# Supplementary material for: Trends in time to invasive examination and treatment from 2001 to 2009 in patients admitted first time with non-ST elevation myocardial infarction or unstable angina in Denmark
Source: PubMed Central journal article supplement — BMJ Open. 2014 Jan 9;4(1):e004052. doi: 10.1136/bmjopen-2013-004052 (PMC3902505; doi:10.1136/bmjopen-2013-004052), 2014-01-09
Supplement: bmjopen-2013-004052.draft_revisions.pdf [file bmjopen-2013-004052.draft_revisions.pdf]

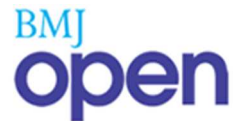

**Trends in invasive examination, treatment rate and time to treatment from 2001 to 2009 in patients admitted first time with non ST-elevation Myocardial Infarction or unstable angina in Denmark.**

|                                 |                                                                                                                                                                                                                                                                                                                                                                                                                                                                                                                     |
|---------------------------------|---------------------------------------------------------------------------------------------------------------------------------------------------------------------------------------------------------------------------------------------------------------------------------------------------------------------------------------------------------------------------------------------------------------------------------------------------------------------------------------------------------------------|
| Journal:                        | <i>BMJ Open</i>                                                                                                                                                                                                                                                                                                                                                                                                                                                                                                     |
| Manuscript ID:                  | bmjopen-2013-004052                                                                                                                                                                                                                                                                                                                                                                                                                                                                                                 |
| Article Type:                   | Research                                                                                                                                                                                                                                                                                                                                                                                                                                                                                                            |
| Date Submitted by the Author:   | 17-Sep-2013                                                                                                                                                                                                                                                                                                                                                                                                                                                                                                         |
| Complete List of Authors:       | Mårtensson, Solvej; Research Center for Prevention and Health, Gyrd-Hansen, Dorte; University of Southern Denmark, COHERE Prescott, Eva; Bispebjerg University Hospital, Department of Cardiology Andersen, Per; Institute of Public Health, 4.Department of Biostatistics Zwisler, Ann-Dorthe; National Institute of Public Health, Danish Heart Registry Osler, Merete; Capital Region of Denmark, 1. Research Centre for Prevention and Health; University of Copenhagen, Copenhagen, Institute of Public Health |
| <b>Primary Subject Heading</b>: | Epidemiology                                                                                                                                                                                                                                                                                                                                                                                                                                                                                                        |
| Secondary Subject Heading:      | Cardiovascular medicine, Epidemiology, Health services research, Health policy                                                                                                                                                                                                                                                                                                                                                                                                                                      |
| Keywords:                       | Cardiac Epidemiology < CARDIOLOGY, Coronary heart disease < CARDIOLOGY, Health policy < HEALTH SERVICES ADMINISTRATION & MANAGEMENT, Cardiac surgery < SURGERY, EPIDEMIOLOGY                                                                                                                                                                                                                                                                                                                                        |
|                                 |                                                                                                                                                                                                                                                                                                                                                                                                                                                                                                                     |

SCHOLARONE™  
Manuscripts

1  
2  
3  
4 **Title**  
5  
6  
7

8 **Trends in invasive examination, treatment rate and time to treatment from 2001 to 2009 in**  
9 **patients admitted first time with non ST-elevation Myocardial Infarction or unstable angina**  
10 **in Denmark.**  
11  
12  
13

14  
15  
16  
17 Solvej Mårtensson MSc Public Health <sup>1\*</sup>, prof. Dorte Gyrd-Hansen <sup>2</sup>, prof. Eva Prescott MD,  
18 DMSc <sup>3</sup>, prof. Per Kragh Andersen<sup>4</sup>, Ann-Dorthe Olsen Zwisler MD PhD<sup>5</sup>, prof. Merete Osler  
19 MD, DMSc <sup>1,6</sup>  
20  
21  
22  
23

- 24  
25  
26 1. Research Centre for Prevention and Health, Capital Region of Denmark, Glostrup, Denmark  
27  
28 2. COHERE, University of Southern Denmark, Odense, Denmark  
29  
30 3. Department of Cardiology, Bispebjerg University Hospital, Copenhagen, Denmark  
31  
32 4. Department of Biostatistics, Institute of Public Health, University of Copenhagen,  
33 Copenhagen, Denmark  
34  
35 5. Danish Heart Registry, National Institute of Public Health, University of Southern Denmark  
36  
37 6. Institute of Public Health, University of Copenhagen, Copenhagen, Denmark  
38  
39  
40  
41  
42

43  
44 **\*Corresponding author: [solvej.maartensson@regionh.dk](mailto:solvej.maartensson@regionh.dk), telephone number: +45 38632198**  
45  
46  
47  
48  
49

50  
51 **Number of words in main text: 3,534**  
52  
53  
54  
55  
56  
57  
58  
59  
60

1  
2  
3  
4 Abstract  
5  
6  
7

8 Objective:  
9

10 To investigate time trends in invasive examination and time to treatment for patient with first time  
11 diagnosis of non-ST-elevation Myocardial infarction (NSTEMI) and unstable angina in the period  
12 from 2001 to 2009 in Denmark  
13  
14  
15  
16  
17

18 Design: From 1 January 2001 to 31 December 2009 all first time hospitalisations with NSTEMI and  
19 unstable angina were identified in the National Patient Registry. Time from admission to initiation  
20 of coronary angiography (CAG), percutaneous coronary intervention (PCI) or coronary artery  
21 bypass graft (CABG) was calculated. We described the development in treatment probability (CAG,  
22 PCI and CABG at 3, 7, 10, 30 and 60 days) for the years 2001 to 2009, taking the competing risk of  
23 death into account using Aalen-Johansen estimators and a Fine Grey model.  
24  
25  
26  
27  
28  
29  
30  
31  
32

33 Setting: Nationwide Danish cohort  
34  
35  
36  
37

38 Results: The proportion of patients with receiving a CAG and PCI increased substantially over time  
39 while the proportion receiving a CABG decreased for both NSTEMI and unstable angina. For both  
40 NSTEMI and unstable angina a significant increase in treatment probability at 3 days for CAG and  
41 PCI was seen especially from 2007 through to 2009. For example for NSTEMI the CAG treatment  
42 probability at 3 days leaped from 21% in 2007 to 34 % in 2008 and 39 % in 2009. For PCI the same  
43 was true with a leap in treatment probability from 19 % to 28 % from 2008 to 2009.  
44  
45  
46  
47  
48  
49  
50  
51  
52  
53  
54  
55  
56  
57  
58  
59  
60

1  
2  
3  
4 Conclusions: In Denmark the use of CAG and PCI in treatment of NSTEMI and unstable angina has  
5  
6 increased from 2001 to 2009 while the use of CABG has decreased. During the same period there  
7  
8 was a marked increase in treatment probability at 3 days i.e. more patients were treated faster which  
9  
10 is in line with the political aim of reducing time to treatment.  
11  
12  
13

14  
15 Main strengths:

- 16
- 17 • Large unselected patient population n=80,033
- 18
- 19 • Detailed register based data
- 20
- 21 • Use of statistical methods that account for competing risks
- 22
- 23 • Information on extension and severity of the disease
- 24
- 25

26 Main limitations:

- 27
- 28 • No information on biomarkers to validate register based data
- 29
- 30 • No information on why patients died before treatment
- 31
- 32
- 33
- 34
- 35
- 36
- 37

38 Keywords: acute coronary heart syndrome, NSTEMI, Unstable angina, time to treatment, time  
39 trends, cohort design  
40  
41  
42  
43  
44  
45  
46  
47  
48  
49  
50  
51  
52  
53  
54  
55  
56  
57  
58  
59  
60

## Introduction

Treatment of acute coronary heart disease has advanced substantially during the latest decades, and improved clinical outcome has been seen (1). A recent register based Danish cohort study by Schmidt et al. found that short term mortality after first time hospitalisation with AMI was nearly halved from 1984 to 2008 (2). It has been suggested that part of this decline can be attributed to improved treatment including introduction of thrombolysis, coronary artery bypass grafting (CABG), percutaneous coronary intervention (PCI) and improved medical prevention after diagnosis (3). Coronary angiography (CAG) is recommended as part of the diagnostic process for all patients with acute myocardial infarction with PCI as the primary intervention (4). Since the mid nineties there has been a strong political focus on time to treatment in order to reduce case fatality (5). For coronary heart disease this focus in Denmark has among other initiatives led to the development of fixed treatment protocols for patients with non ST elevation myocardial infarction (NSTEMI) and unstable angina. These protocols were implemented during 2009. The protocol stipulates that the maximum time from admission with NSTEMI to invasive examination (CAG) should be less than 3 calendar days (72 hours) and time to appropriate invasive treatment less than 3 calendar days for PCI, and 7 calendar days for coronary artery bypass graft surgery (CABG) (6). These protocols are based on the shared European guidelines (4, 7).

The purpose of this study is to explore the potential causes of the significant improvement in prognosis by investigating time trends in invasive examination, treatment and time to treatment for patients with first time diagnosis of NSTEMI or unstable angina in the period from 2001 to 2009 in Denmark using a nationwide cohort design and taking into account vessel disease severity as well as using appropriate methods of analysis that account for the competing risk of death. This study is the first nationwide cohort study to describe time waited for CAG, PCI and CABG over a decade

1  
2  
3  
4  
5  
6  
7  
8  
9  
10  
11  
12  
13  
14  
15  
16  
17  
18  
19  
20  
21  
22  
23  
24  
25  
26  
27  
28  
29  
30  
31  
32  
33  
34  
35  
36  
37  
38  
39  
40  
41  
42  
43  
44  
45  
46  
47  
48  
49  
50  
51  
52  
53  
54  
55  
56  
57  
58  
59  
60

where large changes in treatment of NSTEMI and unstable angina were introduced including the introduction of fixed treatment protocols.

For peer review only

## Method

The Danish health care system provides universal coverage for all citizens. Since 1995, all contacts with the health care system including emergency, ambulatory and inpatient have been registered in the National Patient Registry (NPR) with information about time and date of admission and discharge along with information about diagnosis as well as type and date of potential invasive treatment or examination (8). Furthermore there are several registers and clinical quality databases with patient specific information (9) that can be linked with the data from the NPR through the use of the unique ten-digit person identifier. The registers used for this study are the NPR (8), the National Prescription Registry, which collects information on redeemed prescriptions (10), the Danish Heart Registry, which registers information regarding patients undergoing invasive cardiac procedure (11) and the Medical Cause of Death Registry, which contains information on time and cause of death (12).

### Study population:

From January 1 2001 to December 31 2009 all first time hospitalisations of acute coronary heart syndrome (ACS) were identified in the National Patient Registry (n= 99,473) by the following ICD10 codes (I20.0 Unstable angina pectoris, I21.0-I21.3 ST-elevation myocardial infarction (STEMI), I21.4 non ST-elevation myocardial infarction (NSTEMI) and I21.9 AMI – Unspecified) using discharge diagnoses (see figure 1). Patients with prior heart disease (ICD10: I20-I25) were excluded using information from the NPR going back to 1995 (n= 19,440) leaving 80,033 cases for analysis. Diagnosis can change after the result of CAG therefore we used the diagnosis registered after the CAG in the analysis of time to PCI and CABG. For this reason the number of patients in the different sub-diagnosis groups vary between analyses of CAG, PCI and CABG (see figure 1 for distribution of patients with acute coronary heart syndrome within sub diagnosis group at initial

1  
2  
3  
4 examination and after coronary angiography). Patients with STEMI and unspecified MI are only  
5  
6 included in the initial descriptive analysis of the patient population.  
7  
8  
9

## 10 **Variables**

### 11 **Time to treatment (from admission to CAG, PCI and CABG)**

12  
13  
14  
15  
16  
17 Time (measured in hours) from admission to a hospital to initiation of coronary angiography  
18  
19 (CAG), percutaneous coronary intervention (PCI) or coronary artery bypass graft (CABG) was  
20  
21 calculated using information from the NPR (the specific SKS codes can be seen in appendix 1)  
22  
23  
24 Only treatment and examination within the first 60 days after initial symptom presentation was  
25  
26 included. Further information regarding this variable can be found in appendix 2.  
27  
28  
29

### 30 **Severity and extent of disease**

31  
32  
33 Severity and the extent of disease will influence the perceived urgency of treatment. Information on  
34  
35 number of occluded vessels and LMCA involvement was available from the Danish Heart Register  
36  
37 in 82.2 % and 85.6 % of the cases that received a CAG, respectively.  
38  
39  
40

### 41 **Statistical methods**

42  
43  
44 In the descriptive analysis the number of patients receiving CAG, PCI or CABG was reported along  
45  
46 with the number of patients receiving the respective treatment within 3 days for CAG and PCI and 7  
47  
48 days from CAG for CABG for each diagnosis and for each of the covariates: age, sex, number of  
49  
50 occluded vessels and LMCA involvement. When investigating time to treatment for a specific  
51  
52 disease, it is important to account for the competing risk of death in order to account for the time  
53  
54 waited by patients who die before they are treated (13). Reporting a median time to treatment is not  
55  
56  
57  
58  
59  
60



1  
2  
3  
4 relevant as it will only describe the time waited by patients who manage to be treated. Furthermore,  
5  
6 if we wish to model cumulated probability of treatment (not intensities) and applied standard  
7  
8 methods (e.g. Cox regression method or Kaplan Meier plots), then we would regard death without  
9  
10 treatment as independent censoring and would only be able to make inference for a hypothetical  
11  
12 population where patients do not die without being treated (13). This would not represent a true  
13  
14 picture of reality. The problem of competing risk is especially important for a potentially fatal  
15  
16 disease like ACS where some sub diagnosis have a relative high mortality rate (14, 15).  
17  
18 Furthermore, as first line treatments are mutually exclusive (patients receive either PCI or CABG)  
19  
20 we need to account for the competing risk of receiving the other treatment, respectively. To account  
21  
22 for this competing risk problem we used Aalen-Johansen plots where we described the development  
23  
24 in treatment probability (CAG, PCI and CABG) for the years 2001 to 2009. These plots account for  
25  
26 the competing risk of death and treatment (PCI or CABG, respectively) by showing the estimated  
27  
28 percentage of the original population, which at a given time has received the treatment (CAG, PCI  
29  
30 or CABG). The plot has no distributional assumptions (13). From these plots we derived treatment  
31  
32 probability at 1, 3, 7 (only for CABG), 10, 30 and 60 days after diagnosis. These probabilities are  
33  
34 presented in graphs in order to show the development from 2001 to 2009.  
35  
36  
37  
38  
39  
40  
41

42 To test whether the effects seen in the plots were statistically significant, we used the Fine Gray  
43  
44 model, a regression model that accounts for competing risk and adjusts for covariates (13). In this  
45  
46 model we find the effect of the calendar years when controlling for covariates (age, sex, LMCA  
47  
48 involvement and number of occluded vessels).  
49  
50  
51  
52

53 When analysing the impact of the fixed treatment protocols implemented during 2009, a proper  
54  
55 evaluation with a control group was not feasible due to lack of an appropriate comparison group.  
56  
57  
58  
59  
60

1  
2  
3  
4 Consequently we applied a second-best solution where we looked at whether the change in times to  
5  
6 treatment in the year 2009 differed from the time trend observed in the time period from 2001 to  
7  
8 2008 extrapolated to 2009. The use of this method was inspired by the methods used by Lee et al  
9  
10 when evaluating the effects of Pay for Performance in the UK (16). We tested this in the Fine Gray  
11  
12 model and report the test statistics as z. Year 2001 is the reference when year is included  
13  
14 categorically. In all analyses a 5 % significance level was used. Data were analysed with SAS  
15  
16 version 9.3, STATA version 12.1 and by using the macro COMRISK to draw Aalen-Johansen plot  
17  
18 provided open access by the MAYO Institute.  
19  
20  
21  
22  
23

#### 24 **Results:**

25  
26 Of the 80,033 patients who were registered with first time ACS and no prior heart disease 23.4 %  
27  
28 were admitted with NSTEMI, 19.3 % with unstable angina, 23.3 % with STEMI and 34.0 % with  
29  
30 non-specified MI. A total of 10,080 patients were after the CAG registered with a non ACS  
31  
32 diagnosis and subsequently excluded from the further analysis of PCI and CABG (see appendix 3  
33  
34 where the diagnoses that account for 80% of these patients are listed). After CAG the distribution of  
35  
36 diagnosis were as follows 33.0 % of patients were admitted with NSTEMI, 12.2 % with unstable  
37  
38 angina, 35.7 with STEMI and 19.0 with non-specific MI.  
39  
40  
41  
42  
43

44 Table 1 show that from 2001 to 2009 the proportion of patients with NSTEMI receiving a CAG and  
45  
46 PCI increased substantially, while the proportion receiving a CABG decreased. During the same  
47  
48 period the fraction of patients examined with a CAG who received this within 3 days increased  
49  
50 from 18.2 % to 55.2 %. For PCI a similar development was seen with 52.1 % treated within 3 days  
51  
52 in 2009 compared to 27.2 % in 2001. For CABG within 7 days the percentage slightly declined over  
53  
54 the time period with some fluctuations.  
55  
56  
57  
58  
59  
60

1  
2  
3  
4  
5  
6 *Insert table 1*  
7

8 For unstable angina the activity rate increased for CAG, but not for PCI in the period from 2001 to  
9 2009 (table 3) however for both CAG and PCI the rates of patient who received these procedures  
10 within 3 days doubled in this time period. For CABG the treatment rate was more than halved.  
11  
12  
13  
14

15  
16  
17 *Insert table 2*  
18  
19  
20

21 Figure 2a shows the development in the probability of invasive investigation using CAG from 2001  
22 to 2009 for NSTEMI accounting for the competing risk of death. The figure shows a statistically  
23 significant increase in the use of CAG in the period from 2001 to 2005 with an increase in  
24 probability from 49 % for CAG at 60 days in 2001 to 66.6 % in 2005 (tested using the Fine Gray  
25 model see results in appendix 4). From 2005 and onwards only a slight increase in probability of  
26 CAG at 60 days was seen. The figure also shows a steady increase in the probability of CAG  
27 within 3 days from 2001 to 2007 followed by a leap from 19.3 % in 2007 to 31.5 % in 2008 and a  
28 further increase to 37.5 % in 2009. The fixed treatment protocol seemed to have a significant effect  
29 on the probability of receiving a CAG within 3 days ( $z=3.45$   $p=0.001$ ). For PCI (figure 2b) there  
30 was only a slight increase in the probability of treatment with PCI at 60 days from 2001 to 2009.  
31 Further the probability of PCI treatment within 3 days increased markedly from 2007 to 2008 and  
32 again from 2008 to 2009. The effect of the implementation of the fixed treatment protocols also  
33 revealed a significant effect for PCI ( $z=7.82$   $p<0.001$ ). For CABG the development in treatment  
34 probability was somewhat different with a significant drop in probability of receiving this type of  
35 treatment over the period 2001 to 2006 with subsequent stagnation (figure 1c). The probability of  
36  
37  
38  
39  
40  
41  
42  
43  
44  
45  
46  
47  
48  
49  
50  
51  
52  
53  
54  
55  
56  
57  
58  
59  
60

1  
2  
3  
4 treatment within 7 days of CAG decreased significantly over the period and there seemed to be no  
5  
6 effect of the fixed treatment protocols ( $z=0.32$   $p=0.75$ ).  
7  
8  
9

10  
11 *Insert figure 2*  
12  
13  
14

15 Figure 3 shows the similar graphs for patient with unstable angina. In general the development was  
16  
17 very similar to that of patients with NSTEMI, but with the increase in the invasive  
18  
19 examination/treatment rate later in the observation period (from 2004 to 2008). The probability of  
20  
21 receiving CAG within 3 days increased four-fold from 2001 to 2009 with an almost constant  
22  
23 increase (figure 2a). We saw no effect of the fixed treatment protocols on timing of cag ( $z=-0.76$   
24  
25  $p=0.44$ ). The PCI treatment rate at 60 days was somewhat stable in the time period with a small  
26  
27 drop in 2004, while the probability of treatment within 3 days increased almost constantly from  
28  
29 2001 to 2009. There was no effect of the fixed treatment protocols ( $z=-0.23$   $p=0.82$ ) (figure 2b). For  
30  
31 CABG the treatment probability at 60 days decreased in the time period as well as the treatment  
32  
33 probability at 7 days (figure 2c). There was no significant effect of the fixed treatment protocols.  
34  
35 For both NSTEMI and unstable angina there was no significant development in death before  
36  
37 treatment over time i.e. the competing risk (analysis not shown).  
38  
39  
40  
41  
42  
43

44 *Insert figure 3*  
45  
46  
47  
48

49 When including age, sex, number of occluded vessels and LMCA involvement (last two only for  
50  
51 PCI and CABG) we found that for NSTEMI the development in CAG treatment probability at 3  
52  
53 days and 60 days was the same as seen in the unadjusted analyses, and the effect of the fixed  
54  
55 treatment protocols remained significant. For PCI the same pattern was observed, however when  
56  
57  
58  
59  
60

1  
2  
3  
4 adjusting for number of occluded vessels, the linear effect of year became insignificant, but the  
5  
6 effect of the fixed treatment protocols remained. For CABG the picture did not change after the  
7  
8 adjustment except that the decrease in treatment probability seen at 60 days was not as noticeable as  
9  
10 in the unadjusted analysis. Performing the same adjustments did not change the conclusions for  
11  
12 unstable angina either (See all results from the Fine Gray model in appendix 5).  
13  
14  
15  
16  
17  
18  
19  
20  
21  
22  
23  
24  
25  
26  
27  
28  
29  
30  
31  
32  
33  
34  
35  
36  
37  
38  
39  
40  
41  
42  
43  
44  
45  
46  
47  
48  
49  
50  
51  
52  
53  
54  
55  
56  
57  
58  
59  
60

## Discussion

In this nationwide cohort study, we found a significant increase in the proportions of patients with NSTEMI and unstable angina receiving a CAG and PCI in Denmark between 2001 and 2009, while the proportion receiving CABG decreased. In the analysis accounting for competing risks there was an increase in the probability of treatment within 3 days for CAG and PCI after 2001 and there seemed to be a significant effect of the introduction of a fixed treatment protocol with recommended maximum time from diagnosis to invasive examination and treatment for NSTEMI, but not for unstable angina.

Our results are in agreement with studies from the US, which showed an increase in the use of CAG and PCI over the last two decades, and a decrease in CABG (1, 17, 18). The study also contributes to the interpretation of the findings from a recent Danish study (2), which showed a significant reduction in 30-day and 1-year mortality risk after first time hospitalisation for MI between 1999-2003 and 2004-2008. Part of this reduction could be due to a decrease in time to treatment. When comparing with this study one should keep in mind that we did not include patients with STEMI who are included in Schmidt et al.s study and that these have a succinct treatment path with the need for more urgent treatment. There seems to be no other nationwide studies on trends in time from diagnosis to invasive treatment; however in 2009 Bradley et al reported a decrease in door to balloon time for patients with STEMI after enrolment in a national quality campaign with the aim to reduce the door to balloon time to less than 90 minutes for this group (19).

We did find a significant decline in time for CAG and PCI corresponding to implementation of the fixed treatment protocol for NSTEMI. However, for both NSTEMI and unstable angina, we found a steady increase in treatment rate from 2001 and onwards and for NSTEMI a steep increase in

1  
2  
3  
4 probability already in 2008. This indicates that focus on improvement on time to treatment is not  
5  
6 new. Furthermore the treatment protocols were first implemented during 2009, but they were  
7  
8 already discussed in 2008 and this could have led to early implementation and hence an increase in  
9  
10 speed of treatment before the actual implementation. In this time period there seemed to be a  
11  
12 general agreement on the benefits of an invasive strategy vs. medical management for patients with  
13  
14 NSTEMI (20, 21). However the optimal timing of invasive interventions was not clearly agreed  
15  
16 upon. Mehta et al published in 2009 their results from the large TIMACS trial which included 3031  
17  
18 patients with unstable angina or NSTEMI. They found a significantly lower risk of death,  
19  
20 myocardial infarction or stroke at 6 months for high risk patients when comparing an early (less  
21  
22 than 24 h) with a delayed strategy (more than 36 h). Furthermore they found no safety issues related  
23  
24 to an early strategy (22). This reflects the importance of early treatment however this result reflects  
25  
26 the difference between very early and early invasive intervention which is a slightly other  
27  
28 discussion than ours. In 2010 a meta analysis was published combining four trials which concluded  
29  
30 that early angiography and if relevant treatment for patients with NSTEMI reduces the risk of  
31  
32 recurrent ischemia and shortens hospital stay (23). These results were however not reflected in the  
33  
34 European Society of Cardiology guidelines until 2011 (4). However the previous guideline from  
35  
36 2007 (p. 27) also stated: "...Accordingly, currently available evidence does not mandate a  
37  
38 *systematic approach of immediate angiography in NSTEMI-ACS patients stabilized with a*  
39  
40 *contemporary pharmacological approach. Likewise, routine practice of immediate transfer of*  
41  
42 *stabilized patients admitted in hospitals without onsite catheterization facilities is not mandatory, but*  
43  
44 *should be organized within 72 h" (7).* It should also be noticed that our study is an observational  
45  
46 trend study and we cannot exclude that other organizational or treatment factors than the  
47  
48 introduction of the fixed treatment protocol has contributed to the observed reduction in time to  
49  
50  
51  
52  
53  
54  
55  
56  
57  
58  
59  
60

1  
2  
3  
4 treatment. This study only evaluates the immediate effects of the fixed treatment protocols; however  
5  
6 a longer follow up would also be of interest.  
7  
8  
9

### 10 **Strengths and weaknesses**

11  
12 The primary strength of this study is the large unselected patient population, as it covers all patients  
13 admitted with first time ACS in the period from 2001 to 2009 in Denmark. The patients were  
14 identified in the NPR and data from this register are considered to have a high quality for patients  
15 with a coronary heart disease diagnosis. Thus, a previous study found a positive predictive value for  
16 myocardial infarction in the NPR of 98 % (24). However this means that we do not have  
17 information on biomarkers but solely rely on the correctness on what is registered in the NPR. The  
18 data in the NPR allowed us to follow patients through the course of diagnosis and treatment path,  
19 and we utilised this to change patients' diagnoses after the CAG in case another diagnosis was  
20 registered at this point in time. This was done in order to imitate the clinical situation. At CAG  
21 10,080 patients had a diagnosis other than ACS. The largest group was 3,721 patients with Angina  
22 no specification. This group of patients could potentially be patients with unstable angina however  
23 including this group did not change the conclusions (analysis not shown). We had information on  
24 the specific hour of admission and used this information to calculate time to treatment. Although the  
25 validity of this information can be questioned, we used it in order to calculate the time as precisely  
26 as possible. We only included treatment and examination within 60 days as ACS is an acute disease  
27 for which treatment if relevant should be initiated as soon as possible. We analysed our data by use  
28 of statistical methods that accounted for the competing risk of death, which is very important when  
29 we estimate trends in time to treatment in a population with a high risk of death. However we do not  
30 know whether patients who died were not treated because the risk of treatment was deemed too  
31 high, or because the treatment was not considered relevant. Our analysis showed that the group of  
32  
33  
34  
35  
36  
37  
38  
39  
40  
41  
42  
43  
44  
45  
46  
47  
48  
49  
50  
51  
52  
53  
54  
55  
56  
57  
58  
59  
60



1  
2  
3  
4 patients not receiving CAG was reduced in the period from 2001 to 2009, which was primarily due  
5  
6 to an increase in treatment of elderly patients (analysis not shown). We also included information  
7  
8 on the number of occluded vessels and LMCA involvement as a measure of the extension and  
9  
10 severity of the disease in the analysis. This information was only available for 85.6 % and 82.2 % of  
11  
12 the patients and especially patients from 2001 and 2002 had missing information on this variable.  
13  
14 However, we have no reason to believe that this missing data should be non-random and related to  
15  
16 time to treatment. Further we did not use age standardised data in the trend analyses because the  
17  
18 fixed treatments protocols include all patient groups. However, we tested whether there was an  
19  
20 effect of the treatment protocols in the Fine-Grey model which adjusted for age, gender, LMCA  
21  
22 involvement and number of occluded vessels. The analyses showed that these variables did not  
23  
24 change the effect of the treatment protocols. It should also be noticed that we did not include  
25  
26 patients who died before admission to hospital as these patients are not included in the NPR.  
27  
28  
29  
30  
31  
32

33 **In conclusion, this study** contributes to the interpretation of the recent decline in mortality after  
34  
35 hospitalisation for MI by showing a contemporary increase in the proportion of patients receiving a  
36  
37 CAG and PCI. The study also suggest that the introduction of fixed treatment protocols with a  
38  
39 recommended maximum time from diagnosis to invasive examination and treatment may have  
40  
41 impacted on time to treatment as more patients receive a CAG and PCI within the time limit of 3  
42  
43 days around the time of the introduction of the protocols.  
44  
45  
46  
47

48 **Contributors: SM, DGH, EP, ADOZ, MO contributed to the design of the study. SM carried**  
49  
50 **out statistical analysis with guidance from PKA and MO. SM wrote initial draft and all**  
51  
52 **authors critically revised the manuscript.**  
53  
54  
55  
56  
57  
58  
59  
60

**Funding**

This work was supported by the Danish Heart Association [grant number 10-04-R78-A2806-22609], The Health Insurance Foundation [grant number 2011B037], Fabrikant Ejner Willumsens Mindelegat og Aase og Ejner Danielsens Foundation.

**Competing interest:** None

**Ethics**

This register based study was approved the Danish Data Protection Agency (Approval number 2010-41-5263). Register based studies does not need approval by a medical ethics committee in Denmark.

**Table 1: Coronary angiography (CAG), Percutaneous coronary intervention (PCI) and Coronary artery bypass grafting (CABG) treatment rates and number treated within 3/7 days distributed according to covariates for patients with first time Non ST elevation myocardial infarction (NSTEMI)**

| NSTEMI                     |               | Diagnosis at initial examination |        |              | Diagnosis registered after CAG                                |       |              |                              |       |              |
|----------------------------|---------------|----------------------------------|--------|--------------|---------------------------------------------------------------|-------|--------------|------------------------------|-------|--------------|
|                            |               | CAG within 60 days               |        |              | PCI within 60 days (Grouped according to after CAG diagnosis) |       |              | CABG within 60 days from CAG |       |              |
|                            |               | Treatment rate %                 | n      | % in 3 days* | Treatment rate %                                              | N     | % in 3 days* | Treatment rate %             | n     | % in 7 days* |
| Overall                    | 18,757        | 62.2                             | 11,676 | 31.5         | 52.3                                                          | 6,233 | 30.6         | 16.2                         | 1,933 | 26.5         |
| Year of diagnosis          | 2001          | 49.0                             | 792    | 18.2         | 48.6                                                          | 269   | 27.2         | 22.8                         | 126   | 28.4         |
|                            | 2002          | 54.0                             | 1,112  | 19.0         | 49.3                                                          | 489   | 25.1         | 23.1                         | 229   | 24.8         |
|                            | 2003          | 57.2                             | 1,292  | 25.4         | 51.2                                                          | 643   | 22.4         | 19.0                         | 239   | 38.9         |
|                            | 2004          | 60.2                             | 1,356  | 22.2         | 53.8                                                          | 708   | 23.5         | 17.5                         | 230   | 35.4         |
|                            | 2005          | 66.6                             | 1,437  | 25.8         | 55.9                                                          | 804   | 23.4         | 16.2                         | 233   | 26.2         |
|                            | 2006          | 67.0                             | 1,373  | 28.5         | 54.3                                                          | 814   | 24.2         | 13.4                         | 201   | 22.8         |
|                            | 2007          | 65.6                             | 1,420  | 30.9         | 49.2                                                          | 750   | 26.9         | 16.7                         | 254   | 15.5         |
|                            | 2008          | 69.1                             | 1,545  | 46.5         | 50.1                                                          | 847   | 38.9         | 13.4                         | 226   | 25.0         |
|                            | 2009          | 68.7                             | 1,349  | 55.2         | 55.2                                                          | 909   | 52.1         | 11.8                         | 195   | 23.0         |
| Gender                     | Men           | 69.8                             | 7,850  | 32.0         | 55.9                                                          | 4,423 | 30.5         | 18.6                         | 1,497 | 25.9         |
|                            | Women         | 51.0                             | 3,697  | 29.3         | 46.6                                                          | 1,681 | 27.0         | 11.2                         | 410   | 27.9         |
| Age                        | 30 or younger | 64.9                             | 24     | 36.4         | 13.6                                                          | 3     | 66.7         | -                            | -     | -            |
|                            | 30-39         | 83.8                             | 223    | 45.7         | 51.8                                                          | 113   | 42.5         | 2.2                          | 5     | 60.0         |
|                            | 40-49         | 89.0                             | 1,073  | 41.4         | 58.5                                                          | 627   | 41.6         | 7.2                          | 78    | 35.2         |
|                            | 50-59         | 88.3                             | 2,439  | 33.2         | 60.9                                                          | 1,525 | 30.0         | 12.4                         | 315   | 28.6         |
|                            | 60-69         | 82.9                             | 3,459  | 29.3         | 52.2                                                          | 1,762 | 27.8         | 20.6                         | 702   | 25.0         |
|                            | 70-79         | 65.2                             | 3,253  | 27.2         | 47.4                                                          | 1,530 | 26.0         | 21.6                         | 706   | 24.5         |
|                            | 80 or older   | 21.3                             | 1,076  | 30.5         | 49.2                                                          | 544   | 27.4         | 9.0                          | 101   | 32.6         |
| LMCA** involvement         | Yes           |                                  |        |              | 20.3                                                          | 46    | 27.9         | 64.3                         | 146   | 50.0         |
|                            | No            |                                  |        |              | 54.3                                                          | 5,228 | 31.4         | 14.4                         | 1,384 | 24.5         |
| Number of occluded vessels | 0             |                                  |        |              | 4.5                                                           | 60    | 23.2         | 0.5                          | 6     | 33.3         |
|                            | 1 vessel      |                                  |        |              | 78.0                                                          | 2,743 | 35.4         | 1.6                          | 56    | 32.1         |
|                            | 2 vessels     |                                  |        |              | 71.4                                                          | 1,492 | 31.0         | 12.7                         | 266   | 24.2         |
|                            | 3 vessels     |                                  |        |              | 29.8                                                          | 676   | 29.7         | 49.7                         | 1,126 | 29.2         |

\* National guidelines recommend CAG and PCI within 3 days of diagnosis and CABG within 7 days of CAG.

\*\* Left Main Coronary Artery

**Table 2: Coronary angiography (CAG), Percutaneous coronary intervention (PCI) and Coronary artery bypass grafting (CABG) treatment rates and number treated within 3/7 days distributed according to covariates for patients with first time Unstable Angina**

| Unstable angina                   |                      | Diagnosis at initial examination |       |              | Diagnosis registered after CAG                                |       |              |                              |     |              |
|-----------------------------------|----------------------|----------------------------------|-------|--------------|---------------------------------------------------------------|-------|--------------|------------------------------|-----|--------------|
|                                   |                      | CAG within 60 days               |       |              | PCI within 60 days (Grouped according to after CAG diagnosis) |       |              | CABG within 60 days from CAG |     |              |
|                                   |                      | Treatment rate %                 | n     | % in 3 days* | Treatment rate %                                              | n     | % in 3 days* | Treatment rate %             | n   | % in 7 days* |
| <b>Overall</b>                    | <b>15,469</b>        | 52.5                             | 8,114 | 44.8         | 48.4                                                          | 2,134 | 38.4         | 18.0                         | 795 | 42.6         |
| <b>Year of diagnosis</b>          | <b>2001</b>          | 43.1                             | 778   | 29.4         | 51.4                                                          | 238   | 25.1         | 25.9                         | 120 | 46.8         |
|                                   | <b>2002</b>          | 43.4                             | 900   | 33.5         | 46.3                                                          | 211   | 30.5         | 28.1                         | 128 | 42.7         |
|                                   | <b>2003</b>          | 45.0                             | 897   | 40.0         | 47.7                                                          | 213   | 32.8         | 22.8                         | 102 | 54.3         |
|                                   | <b>2004</b>          | 49.3                             | 915   | 35.6         | 41.4                                                          | 178   | 22.3         | 20.2                         | 87  | 52.5         |
|                                   | <b>2005</b>          | 51.4                             | 951   | 45.2         | 50.7                                                          | 243   | 38.4         | 14.8                         | 71  | 36.4         |
|                                   | <b>2006</b>          | 57.1                             | 946   | 46.7         | 50.5                                                          | 245   | 40.2         | 15.3                         | 74  | 38.2         |
|                                   | <b>2007</b>          | 61.0                             | 895   | 51.0         | 47.5                                                          | 222   | 42.0         | 16.1                         | 75  | 30.8         |
|                                   | <b>2008</b>          | 67.9                             | 942   | 56.0         | 48.8                                                          | 329   | 52.1         | 12.2                         | 82  | 41.0         |
|                                   | <b>2009</b>          | 64.7                             | 890   | 61.8         | 50.1                                                          | 255   | 50.0         | 11.0                         | 56  | 28.0         |
| <b>Gender</b>                     | <b>Men</b>           | 57.0                             | 4,894 | 44.8         | 50.5                                                          | 1,394 | 38.7         | 21.3                         | 598 | 42.7         |
|                                   | <b>Women</b>         | 46.2                             | 2,921 | 40.0         | 46.6                                                          | 684   | 33.6         | 11.9                         | 177 | 41.6         |
| <b>Age</b>                        | <b>30 or younger</b> | 23.3                             | 27    | 61.5         | -                                                             | -     | -            | -                            | -   | -            |
|                                   | <b>30-39</b>         | 35.1                             | 226   | 47.7         | 36.4                                                          | 36    | 51.4         | 14.3                         | 1   | 25.0         |
|                                   | <b>40-49</b>         | 47.2                             | 922   | 45.2         | 48.1                                                          | 219   | 44.8         | 3.9                          | 4   | 51.7         |
|                                   | <b>50-59</b>         | 59.4                             | 1,999 | 40.6         | 52.2                                                          | 560   | 39.2         | 6.9                          | 32  | 35.2         |
|                                   | <b>60-69</b>         | 64.0                             | 2,373 | 43.7         | 49.7                                                          | 648   | 35.3         | 14.1                         | 153 | 45.2         |
|                                   | <b>70-79</b>         | 56.5                             | 1,730 | 41.7         | 45.5                                                          | 443   | 32.4         | 21.6                         | 287 | 41.5         |
|                                   | <b>80 or older</b>   | 26.0                             | 538   | 46.2         | 53.6                                                          | 172   | 35.8         | 26.2                         | 258 | 52.6         |
| <b>LMCA*</b>                      | <b>yes</b>           |                                  |       |              | 16.0                                                          | 24    | 45.8         | 12.3                         | 40  | 58.6         |
|                                   | <b>No</b>            |                                  |       |              | 51.2                                                          | 1,810 | 38.9         | 74.0                         | 111 | 39.1         |
| <b>Number of occluded vessels</b> | <b>0</b>             |                                  |       |              | 3.6                                                           | 24    | 39.1         | 15.6                         | 551 | 33.3         |
|                                   | <b>1 vessel</b>      |                                  |       |              | 78.2                                                          | 1,068 | 42.6         | 0.6                          | 4   | 37.9         |
|                                   | <b>2 vessels</b>     |                                  |       |              | 66.4                                                          | 487   | 36.5         | 2.5                          | 34  | 42.0         |
|                                   | <b>3 vessels</b>     |                                  |       |              |                                                               |       |              |                              |     |              |
|                                   | <b>vessels</b>       |                                  |       |              | 26.2                                                          | 205   | 32.5         | 19.1                         | 140 | 43.1         |

\* National guidelines recommend CAG and PCI within 3 days of diagnosis and CABG within 7 days of CAG.

\*\* Left Main Coronary Artery

## Reference List

1. Fox KA, Steg PG, Eagle KA, Goodman SG, Anderson FA, Jr., Granger CB, Flather MD, Budaj A, Quill A, Gore JM. Decline in rates of death and heart failure in acute coronary syndromes, 1999-2006. *JAMA* 2007;**297**(17):1892-1900.
2. Schmidt M, Jacobsen JB, Lash TL, Botker HE, Sorensen HT. 25 year trends in first time hospitalisation for acute myocardial infarction, subsequent short and long term mortality, and the prognostic impact of sex and comorbidity: a Danish nationwide cohort study. *BMJ* 2012;**344**:e356.
3. Ford ES, Ajani UA, Croft JB, Critchley JA, Labarthe DR, Kottke TE, Giles WH, Capewell S. Explaining the decrease in U.S. deaths from coronary disease, 1980-2000. *N Engl J Med* 2007;**356**(23):2388-2398.
4. Hamm CW, Bassand JP, Agewall S, Bax J, Boersma E, Bueno H, Caso P, Dudek D, Gielen S, Huber K, Ohman M, Petrie MC, Sonntag F, Uva MS, Storey RF, Wijns W, Zahger D, Bax JJ, Auricchio A, Baumgartner H, Ceconi C, Dean V, Deaton C, Fagard R, Funck-Brentano C, Hasdai D, Hoes A, Knuuti J, Kolh P, McDonagh T, Moulin C, Poldermans D, Popescu BA, Reiner Z, Sechtem U, Sirnes PA, Torbicki A, Vahanian A, Windecker S, Windecker S, Achenbach S, Badimon L, Bertrand M, Botker HE, Collet JP, Crea F, Danchin N, Falk E, Goudevenos J, Gulba D, Hambrecht R, Herrmann J, Kastrati A, Kjeldsen K, Kristensen SD, Lancellotti P, Mehilli J, Merkely B, Montalescot G, Neumann FJ, Neyses L, Perk J, Roffi M, Romeo F, Ruda M, Swahn E, Valgimigli M, Vrints CJ, Widimsky P. ESC Guidelines for the management of acute coronary syndromes in patients presenting without persistent ST-segment elevation: The Task Force for the management of acute coronary syndromes (ACS) in patients presenting without persistent ST-segment elevation of the European Society of Cardiology (ESC). *Eur Heart J* 2011;**32**(23):2999-3054.
5. Pedersen KM, Christiansen T, Bech M. The Danish health care system: evolution--not revolution--in a decentralized system. *Health Econ* 2005;**14**(Suppl 1):S41-S57.
6. Danish National Board of Health. Treatment protocols for unstable angina and acute myocardial infarction without ST-segment elevation  
<http://www.sst.dk/Udgivelser/2009/Pakkeforloeb%20for%20ustabil%20angina%20pectoris%20UAP%20og%20akut%20myokardieinfakt%20uden%20st-elevation%20NSTEMI.aspx>. 2009.
7. Bassand JP, Hamm CW, Ardissino D, Boersma E, Budaj A, Fernandez-Aviles F, Fox KA, Hasdai D, Ohman EM, Wallentin L, Wijns W. Guidelines for the diagnosis and treatment of non-ST-segment elevation acute coronary syndromes. *Eur Heart J* 2007;**28**(13):1598-1660.
8. Lynge E, Sandegaard JL, Rebolj M. The Danish National Patient Register. *Scand J Public Health* 2011;**39**(7 Suppl):30-33.
9. Green A. Danish clinical databases: an overview. *Scand J Public Health* 2011;**39**(7 Suppl):68-71.

10. Kildemoes HW, Sorensen HT, Hallas J. The Danish National Prescription Registry. *Scand J Public Health* 2011;**39**(7 Suppl):38-41.
11. Abildstrom SZ, Madsen M. The Danish Heart Register. *Scand J Public Health* 2011;**39**(7 Suppl):46-49.
12. Helweg-Larsen K. The Danish Register of Causes of Death. *Scand J Public Health* 2011;**39**(7 Suppl):26-29.
13. Andersen PK, Geskus RB, de WT, Putter H. Competing risks in epidemiology: possibilities and pitfalls. *Int J Epidemiol* 2012.
14. Jensen LO, Thayssen P. [Treatment and prognosis after acute coronary syndrome in an unselected patient population]. *Ugeskr Laeger* 2007;**169**(6):492-497.
15. Nikus KC, Eskola MJ, Virtanen VK, Harju J, Huhtala H, Mikkelsen J, Karhunen PJ, Niemela KO. Mortality of patients with acute coronary syndromes still remains high: a follow-up study of 1188 consecutive patients admitted to a university hospital. *Ann Med* 2007;**39**(1):63-71.
16. Lee JT, Netuveli G, Majeed A, Millett C. The effects of pay for performance on disparities in stroke, hypertension, and coronary heart disease management: interrupted time series study. *PLoS One* 2011;**6**(12):e27236.
17. McManus DD, Gore J, Yarzebski J, Spencer F, Lessard D, Goldberg RJ. Recent trends in the incidence, treatment, and outcomes of patients with STEMI and NSTEMI. *Am J Med* 2011;**124**(1):40-47.
18. Peterson ED, Shah BR, Parsons L, Pollack CV, Jr., French WJ, Canto JG, Gibson CM, Rogers WJ. Trends in quality of care for patients with acute myocardial infarction in the National Registry of Myocardial Infarction from 1990 to 2006. *Am Heart J* 2008;**156**(6):1045-1055.
19. Bradley EH, Nallamothu BK, Herrin J, Ting HH, Stern AF, Nembhard IM, Yuan CT, Green JC, Kline-Rogers E, Wang Y, Curtis JP, Webster TR, Masoudi FA, Fonarow GC, Brush JE, Jr., Krumholz HM. National efforts to improve door-to-balloon time results from the Door-to-Balloon Alliance. *J Am Coll Cardiol* 2009;**54**(25):2423-2429.
20. Bavry AA, Kumbhani DJ, Rassi AN, Bhatt DL, Askari AT. Benefit of early invasive therapy in acute coronary syndromes: a meta-analysis of contemporary randomized clinical trials. *J Am Coll Cardiol* 2006;**48**(7):1319-1325.
21. Fox KA, Poole-Wilson PA, Henderson RA, Clayton TC, Chamberlain DA, Shaw TR, Wheatley DJ, Pocock SJ. Interventional versus conservative treatment for patients with unstable angina or non-ST-elevation myocardial infarction: the British Heart Foundation RITA 3 randomised trial. Randomized Intervention Trial of unstable Angina. *Lancet* 2002;**360**(9335):743-751.
22. Mehta SR, Granger CB, Boden WE, Steg PG, Bassand JP, Faxon DP, Afzal R, Chrolavicius S, Jolly SS, Widimsky P, Avezum A, Rupprecht HJ, Zhu J, Col J, Natarajan MK, Horsman C, Fox KA, Yusuf S. Early versus delayed invasive intervention in acute coronary syndromes. *N Engl J Med* 2009;**360**(21):2165-2175.

- 1  
2  
3  
4 23. Katritsis DG, Siontis GC, Kastrati A, van't Hof AW, Neumann FJ, Siontis KC, Ioannidis JP.  
5 Optimal timing of coronary angiography and potential intervention in non-ST-elevation acute  
6 coronary syndromes. *Eur Heart J* 2011;**32**(1):32-40.  
7
- 8 24. Thygesen SK, Christiansen CF, Christensen S, Lash TL, Sorensen HT. The predictive value of  
9 ICD-10 diagnostic coding used to assess Charlson comorbidity index conditions in the  
10 population-based Danish National Registry of Patients. *BMC Med Res Methodol* 2011;**11**:83.  
11  
12  
13  
14  
15  
16  
17  
18  
19  
20  
21  
22  
23  
24  
25  
26  
27  
28  
29  
30  
31  
32  
33  
34  
35  
36  
37  
38  
39  
40  
41  
42  
43  
44  
45  
46  
47  
48  
49  
50  
51  
52  
53  
54  
55  
56  
57  
58  
59  
60

Figure 1: Flowchart patient population

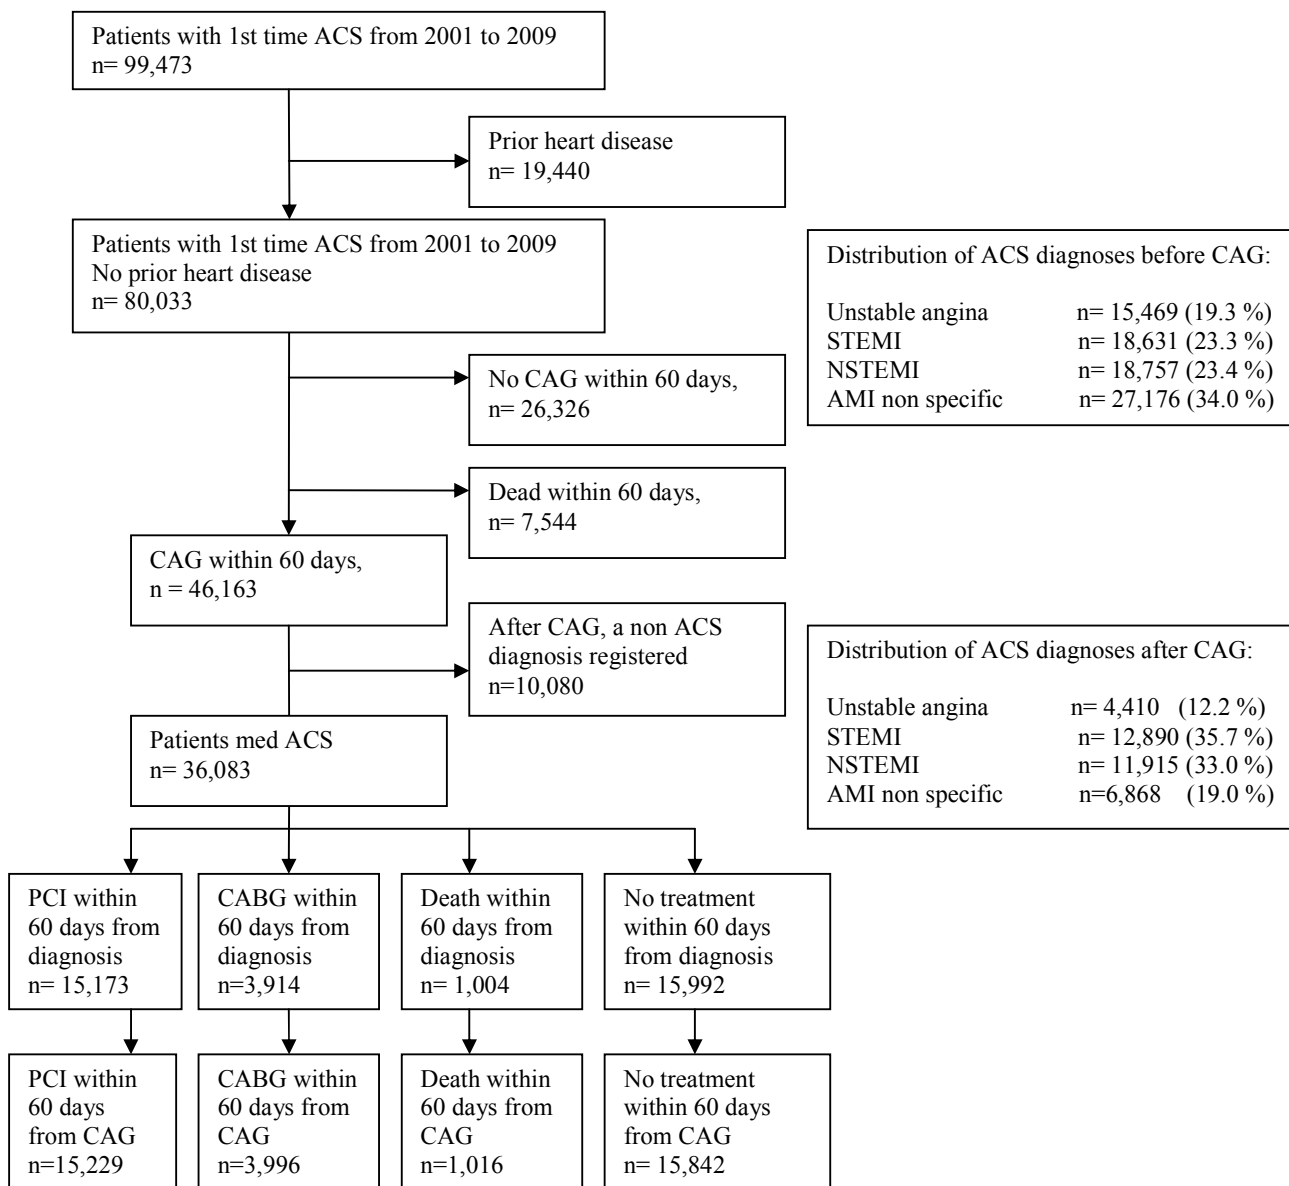

**ACS:** Acute coronary heart syndrome  
**STEMI:** ST elevation myocardial infarction  
**NSTEMI:** Non ST elevation myocardial infarction  
**AMI:** Acute myocardial infarction  
**CAG:** Coronary angiography  
**CABG:** Coronary artery bypass grafting  
**PCI:** Percutaneous coronary intervention



Figure 2a, b and c: Development in Coronary angiography (CAG), Percutaneous coronary intervention (PCI) and Coronary artery bypass grafting (CABG) treatment probability from year 2001 to 2009 for patients with Non ST elevation myocardial infarction at day 1, 3, 7 (CABG only), 10, 30 and 60.

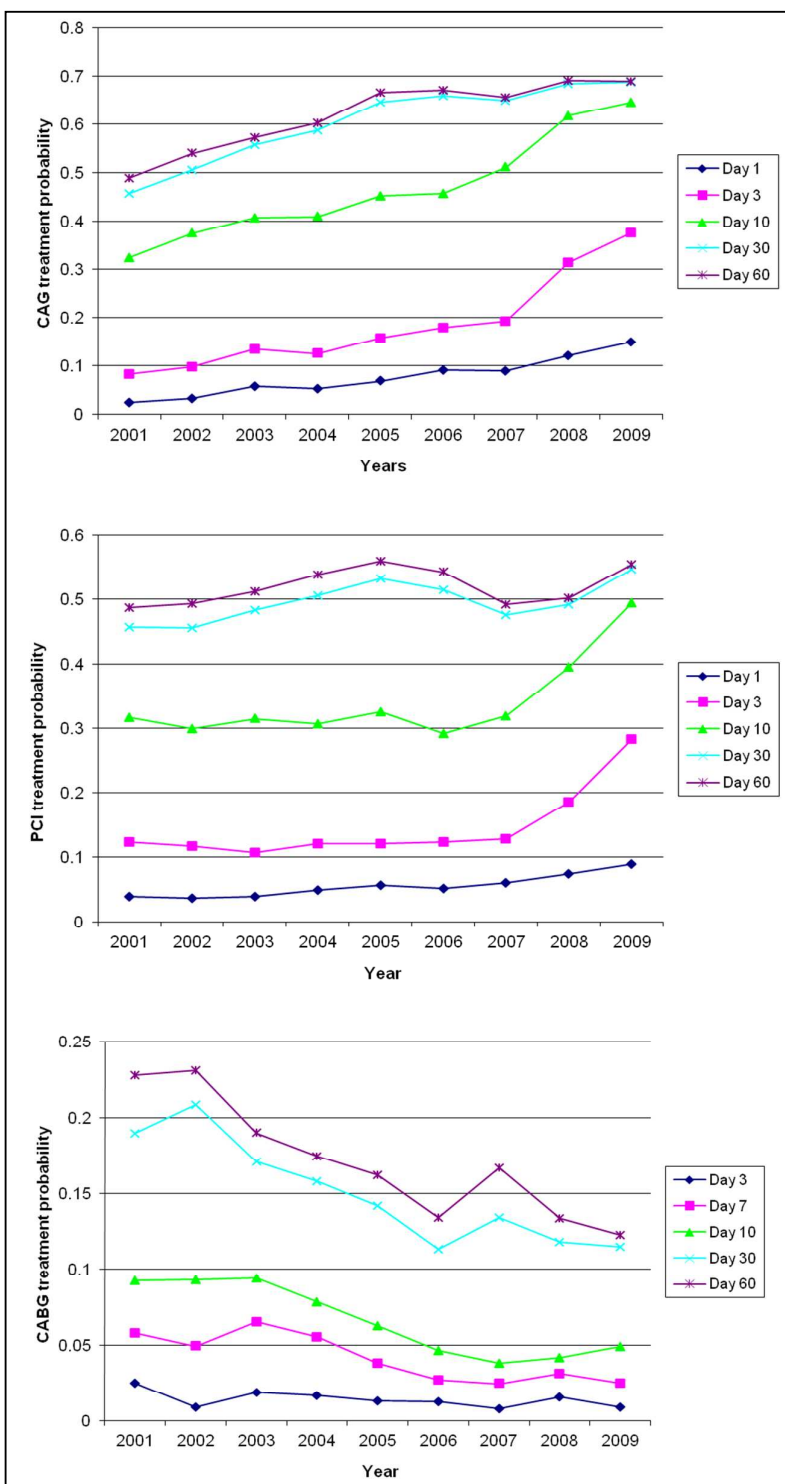

§ For PCI and CABG only among those who receive CAG  
 # For CABG time is measured from time of CAG

Figure 3 a, b, c: Development in Coronary angiography (CAG), Percutaneous coronary intervention (PCI) and Coronary artery bypass grafting (CABG) treatment probability from year 2001 to 2009 for patients with unstable angina at day 1, 3, 7 (CABG only), 10, 30 and 60

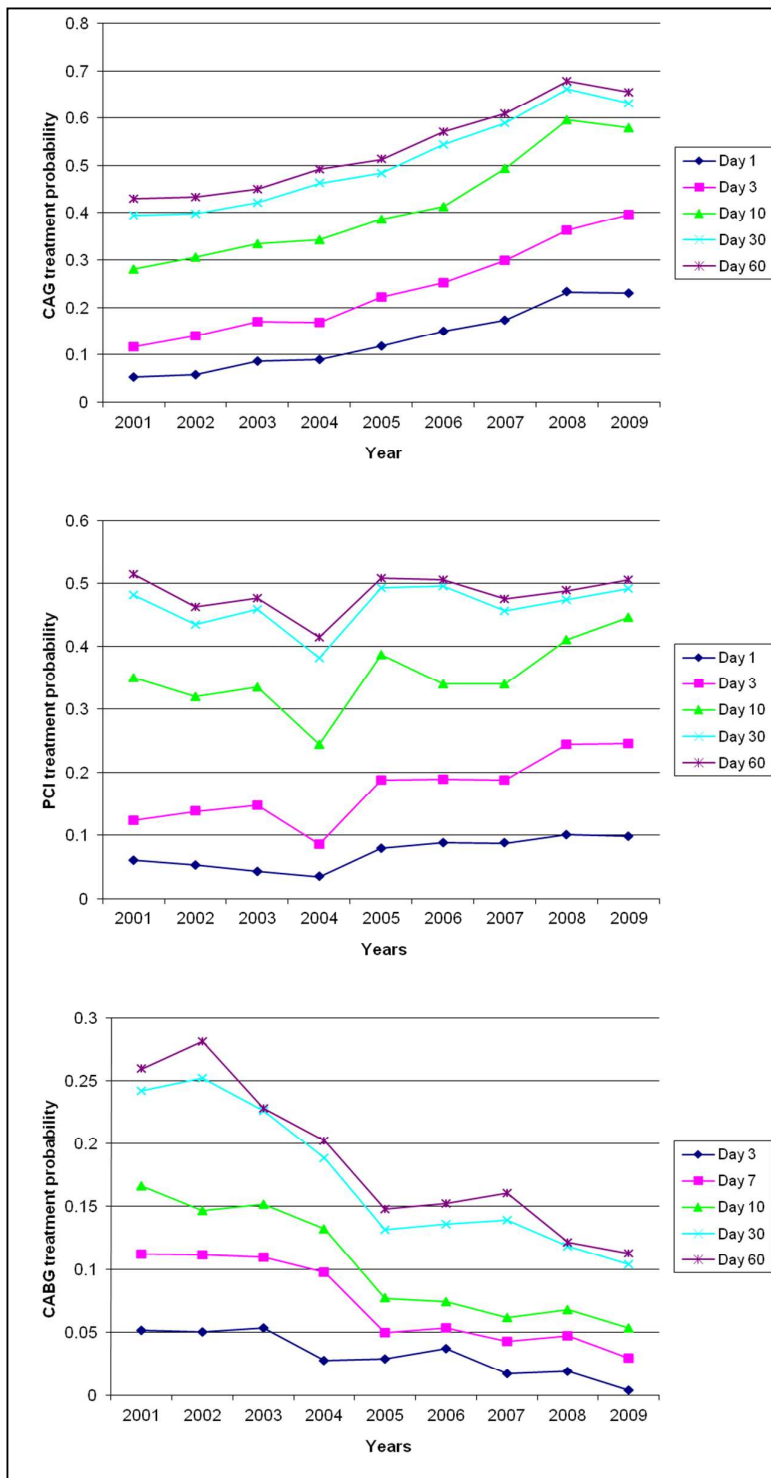

§ For PCI and CABG only among those who receive CAG

# For CABG time is measured from time of CAG

**Appendix 1: Treatment codes (SKS codes)**

CAG: UXAC85, UXAC85A, UXAC85B, UXAC85C or UXAC85D;

PCI: KFNG, KFNG00, KFNG02, KFNG05, KFNG10, KFNG12, KFNG20, KFNG22, KFNG30, KFNG40, KFNG96;

CABG: KFNA, KFNA00, KFNA10, KFNA20, KFNC, KFNC10, KFNC20, KFNC30, KFNC40, KFNC50, KFNC60, KFNC96, KFND, KFND10, KFND20, KFND96, KFNE, KFNE00, KFND10, KFNE20, KFND96.

**ACS:** Acute coronary heart syndrome  
**STEMI:** ST elevation myocardial infarction  
**NSTEMI:** Non ST elevation myocardial infarction  
**AMI:** Acute myocardial infarction  
**CAG:** Coronary angiography  
**CABG:** Coronary artery bypass grafting  
**PCI:** Percutaneous coronary intervention

## Appendix 2: Definition of time to treatment

Both date and clock-time is important in relation to the definition of time to treatment. Date is available for all patients for both admission and procedure while clock-time was missing in some cases. For patients for whom information on clock time of admission was missing, time of admission was defined as one hour before the time registration for the CAG (n=498). For example, if a patient was admitted on the 10<sup>th</sup> of June with missing time information and had a CAG on June 11<sup>th</sup> at 10 AM then the waiting time would be set at 25 hours. Conversely, if time information on CAG (n=109), PCI (n=195) or CABG (n=335) was missing, then the hour of CAG, PCI and CABG was defined as one hour after the time registered at the initial admission. This ensured that the dates of admission were still used, but that the waiting time could not end up being negative. Patients without information on both the time of initial presentation and time of CAG (n=2), PCI (n=1) and CABG (n=5) respectively were excluded from the analysis. If a patient received both PCI and CABG, then only the first treatment received was included in the analysis.

**Appendix 3: Distribution of diagnosis for patients with a non acute coronary heart syndrome diagnosis at coronary angiography**

| Specification                                        | SKS-code | Number        | %           |
|------------------------------------------------------|----------|---------------|-------------|
| Hypertension arterialis essentialis                  | DI109    | 161           | 1.6         |
| Other form of angina pectoris                        | DI100    | 100           | 1.0         |
| Angina pectoris no specification                     | DI209    | 3,721         | 36.9        |
| Angina pectoris (stable)                             | DI251    | 1,610         | 16.0        |
| Former myokardial infarction                         | DI252    | 620           | 6.2         |
| Chronic ischemic heart disease without specification | DI259    | 320           | 3.2         |
| Aorta valve stenose, non reumatoid                   | DI350    | 184           | 1.8         |
| Heart failure no specification                       | DI509    | 159           | 1.6         |
| Chest pain no specification                          | DR079    | 152           | 1.5         |
| Cardiogenic shock                                    | DR570    | 109           | 1.1         |
| Observation myocardial infarction                    | DZ034    | 296           | 2.9         |
| Observation heart disease                            | DZ035    | 764           | 7.6         |
| <b>Sub total</b>                                     |          | <b>8,196</b>  | <b>81.3</b> |
| Other                                                | Other    | 1,884         | 18.7        |
| <b>Total</b>                                         |          | <b>10,080</b> | <b>100</b>  |

## Appendix 4: Additional results for NSTEMI

### 4.1. Results from the Fine Grey model for NSTEMI at 3 days (CAG/PCI) and 7 days (CABG)

#### 4.1.a CAG

| NSTEMI                    | Year categorical<br>n =18,757 |            | Year continuous<br>n =18,757 |           | + fixed treatment<br>protocols<br>n =18,757 |           | + age<br>n=18,482 |              | + sex<br>n=18,482 |              |
|---------------------------|-------------------------------|------------|------------------------------|-----------|---------------------------------------------|-----------|-------------------|--------------|-------------------|--------------|
| Year                      | $\beta$                       | CI 95      | $\beta$                      | CI 95     | $\beta$                                     | CI 95     | $\beta$           | CI 95        | $\beta$           | CI 95        |
| 2001                      | 0                             |            | 0.21                         | 0.20-0.23 | 0.19                                        | 0.18-0.21 | 0.19              | 0.18-0.21    | 0.19              | 0.18-0.21    |
| 2002                      | 0.18                          | -0.04-0.40 |                              |           |                                             |           |                   |              |                   |              |
| 2003                      | 0.53                          | 0.33-0.66  |                              |           |                                             |           |                   |              |                   |              |
| 2004                      | 0.45                          | 0.25-0.66  |                              |           |                                             |           |                   |              |                   |              |
| 2005                      | 0.70                          | 0.50-0.90  |                              |           |                                             |           |                   |              |                   |              |
| 2006                      | 0.86                          | 0.66-1.06  |                              |           |                                             |           |                   |              |                   |              |
| 2007                      | 0.93                          | 0.73-1.13  |                              |           |                                             |           |                   |              |                   |              |
| 2008                      | 1.48                          | 1.30-1.67  |                              |           |                                             |           |                   |              |                   |              |
| 2009                      | 1.70                          | 1.50-1.88  |                              |           |                                             |           |                   |              |                   |              |
| Fixed treatment protocols |                               |            |                              |           | 0.18                                        | 0.08-0.28 | 0.22              | 0.11-0.32    | 0.22              | 0.12-0.32    |
| Age                       |                               |            |                              |           |                                             |           |                   |              |                   |              |
| Ref: < 50                 |                               |            |                              |           |                                             |           | 0                 |              | 0                 |              |
| 50-59                     |                               |            |                              |           |                                             |           | -0.21             | -0.32(-0.10) | -0.22             | -0.33(-0.11) |
| 60-79                     |                               |            |                              |           |                                             |           | -0.62             | -0.72(-0.53) | -0.61             | -0.70(-0.51) |
| >80                       |                               |            |                              |           |                                             |           | -1.90             | -2.04(-1.76) | -1.84             | -1.99(-1.70) |
| Sex                       |                               |            |                              |           |                                             |           |                   |              |                   |              |
| Men                       |                               |            |                              |           |                                             |           |                   |              | 0                 |              |
| Women                     |                               |            |                              |           |                                             |           |                   |              | -0.20             | -0.28(-0.13) |

#### 4.1.b PCI

| NSTEMI                     | Year categorical<br>n=11,915 |            | Year continuous<br>n=11,915 |           | + fixed treatment<br>protocols<br>n=11,915 |           | + age<br>n=11,680 |              | + sex<br>n=11,680 |              | + Number of occluded<br>vessels and main trunk<br>disease<br>n=7,592 |              |
|----------------------------|------------------------------|------------|-----------------------------|-----------|--------------------------------------------|-----------|-------------------|--------------|-------------------|--------------|----------------------------------------------------------------------|--------------|
| Year                       | $\beta$                      | CI 95      | $\beta$                     | CI 95     | $\beta$                                    | CI 95     | $\beta$           | CI 95        | $\beta$           | CI 95        | $\beta$                                                              | CI 95        |
| 2001                       | 0                            |            | 0.14                        | 0.11-0.16 | 0.07                                       | 0.04-0.10 | 0.07              | 0.04-0.09    | 0.07              | 0.04-0.10    | 0.03                                                                 | -0.003-0.06  |
| 2002                       | -0.05                        | -0.35-0.24 |                             |           |                                            |           |                   |              |                   |              |                                                                      |              |
| 2003                       | -0.15                        | -0.44-0.14 |                             |           |                                            |           |                   |              |                   |              |                                                                      |              |
| 2004                       | -0.01                        | -0.30-0.27 |                             |           |                                            |           |                   |              |                   |              |                                                                      |              |
| 2005                       | -0.01                        | -0.29-0.27 |                             |           |                                            |           |                   |              |                   |              |                                                                      |              |
| 2006                       | 0.01                         | -0.27-0.29 |                             |           |                                            |           |                   |              |                   |              |                                                                      |              |
| 2007                       | 0.05                         | -0.22-0.33 |                             |           |                                            |           |                   |              |                   |              |                                                                      |              |
| 2008                       | 0.45                         | 0.19-0.71  |                             |           |                                            |           |                   |              |                   |              |                                                                      |              |
| 2009                       | 0.91                         | 0.66-1.17  |                             |           |                                            |           |                   |              |                   |              |                                                                      |              |
| Fixed treatment protocols  |                              |            |                             |           | 0.57                                       | 0.43-0.71 | 0.62              | 0.47-0.76    | 0.61              | 0.47-0.76    | 0.55                                                                 | 0.40-0.71    |
| Age                        |                              |            |                             |           |                                            |           |                   |              |                   |              |                                                                      |              |
| (ref = < 50)               |                              |            |                             |           |                                            |           | 0                 |              | 0                 |              | 0                                                                    |              |
| 50-59                      |                              |            |                             |           |                                            |           | -0.20             | -0.34(-0.05) | -0.20             | -0.35-0.06   | -0.29                                                                | -0.45(-0.14) |
| 60-79                      |                              |            |                             |           |                                            |           | -0.59             | -0.72(-0.45) | -0.57             | -0.70(-0.44) | -0.54                                                                | -0.68(-0.40) |
| >80                        |                              |            |                             |           |                                            |           | -0.67             | -0.88(-0.47) | -0.62             | -0.83(-0.42) | -0.54                                                                | -0.76(-0.33) |
| Sex                        |                              |            |                             |           |                                            |           |                   |              |                   |              |                                                                      |              |
| (ref=men)                  |                              |            |                             |           |                                            |           |                   |              | 0                 |              | 0                                                                    |              |
| Women                      |                              |            |                             |           |                                            |           |                   |              | -0.27             | -0.38(-0.16) | -0.10                                                                | -0.21-0.02   |
| LMCA involvement           |                              |            |                             |           |                                            |           |                   |              |                   |              |                                                                      |              |
| (ref=no)                   |                              |            |                             |           |                                            |           |                   |              |                   |              | 0                                                                    |              |
| Yes                        |                              |            |                             |           |                                            |           |                   |              |                   |              | 0.68                                                                 | 0.07-1.29    |
| Number of occluded vessels |                              |            |                             |           |                                            |           |                   |              |                   |              |                                                                      |              |
| (ref=1)                    |                              |            |                             |           |                                            |           |                   |              |                   |              | 0                                                                    |              |
| 2                          |                              |            |                             |           |                                            |           |                   |              |                   |              | -0.13                                                                | -0.24(-0.01) |
| 3                          |                              |            |                             |           |                                            |           |                   |              |                   |              | -1.03                                                                | -1.20(-0.87) |

## 4.1.c. CABG

| NSTEMI                                      | Year categorical<br>n=11,915 |               | Year continuous<br>n=11,915 |               | + fixed treatment<br>protocols<br>n=11,915 |               | + age<br>n=11,680 |               | + sex<br>n=11,680 |                    | + Number of occluded<br>vessels and main trunk<br>disease<br>n=7,592 |                    |
|---------------------------------------------|------------------------------|---------------|-----------------------------|---------------|--------------------------------------------|---------------|-------------------|---------------|-------------------|--------------------|----------------------------------------------------------------------|--------------------|
|                                             | $\beta$                      | CI 95         | $\beta$                     | CI 95         | $\beta$                                    | CI 95         | B                 | CI 95         | $\beta$           | CI 95              | $\beta$                                                              | CI 95              |
| 2001                                        | 0                            |               | -0.13                       | -0.17-(-0.09) | -0.14                                      | -0.18-(-0.09) | -0.13             | -0.17-(-0.09) | -0.13             | -0.17-(-0.09)      | -0.18                                                                | -0.23-(-0.12)      |
| 2002                                        | -0.17                        | -0.62-0.28    |                             |               |                                            |               |                   |               |                   |                    |                                                                      |                    |
| 2003                                        | 0.12                         | -0.29-0.53    |                             |               |                                            |               |                   |               |                   |                    |                                                                      |                    |
| 2004                                        | -0.05                        | -0.47-0.37    |                             |               |                                            |               |                   |               |                   |                    |                                                                      |                    |
| 2005                                        | -0.43                        | -0.87-0.01    |                             |               |                                            |               |                   |               |                   |                    |                                                                      |                    |
| 2006                                        | -0.77                        | -1.23-(-0.30) |                             |               |                                            |               |                   |               |                   |                    |                                                                      |                    |
| 2007                                        | -0.86                        | -1.34-(-0.39) |                             |               |                                            |               |                   |               |                   |                    |                                                                      |                    |
| 2008                                        | -0.63                        | -1.07-(-0.19) |                             |               |                                            |               |                   |               |                   |                    |                                                                      |                    |
| 2009                                        | -0.86                        | -1.33-(-0.40) |                             |               |                                            |               |                   |               |                   |                    |                                                                      |                    |
| Fixed<br>treatment<br>protocols             |                              |               |                             |               | 0.06                                       | -0.31-0.44    | 0.02              | -0.36-0.41    | -0.01             | -0.37-0.39         | 0.09                                                                 | -0.42-0.61         |
| Age<br>(ref = < 50)                         |                              |               |                             |               |                                            |               |                   |               |                   |                    |                                                                      |                    |
| 50-59                                       |                              |               |                             |               |                                            |               | 0.46              | 0.03-0.90     | 0.45              | -0.01-0.88         | -0.07                                                                | -0.57-0.42         |
| 60-79                                       |                              |               |                             |               |                                            |               | 0.86              | 0.47-1.25     | 0.89              | 0.50-1.29          | -0.16                                                                | -0.61-0.29         |
| >80                                         |                              |               |                             |               |                                            |               | 0.38              | -0.14-0.90    | 0.48              | -0.05-1.00         | -0.96                                                                | -1.61-(-0.32)      |
| Sex<br>(ref=men)                            |                              |               |                             |               |                                            |               |                   |               |                   |                    |                                                                      |                    |
| Women                                       |                              |               |                             |               |                                            |               |                   |               | 0                 | -0.48-0.71-(-0.26) | -0.23                                                                | -0.52-0.04         |
| LMCA<br>involve-<br>ment<br>(ref=no)        |                              |               |                             |               |                                            |               |                   |               |                   |                    |                                                                      |                    |
| Yes                                         |                              |               |                             |               |                                            |               |                   |               |                   |                    | 0                                                                    | -1.22-1.53-(-0.92) |
| Number of<br>occluded<br>vessels<br>(ref=1) |                              |               |                             |               |                                            |               |                   |               |                   |                    |                                                                      |                    |
| 2                                           |                              |               |                             |               |                                            |               |                   |               |                   |                    | 0                                                                    | 1.67-1.07-2.27     |
| 3                                           |                              |               |                             |               |                                            |               |                   |               |                   |                    | 3.26                                                                 | 2.71-3.82          |

## 4.2. Results from the Fine Grey model for NSTEMI at 60 days

## 4.2.a CAG

| NSTEMI    | Year categorical<br>n=18,757 |           | Year continuous n<br>n=18,757 |           | + age<br>n=18,482 |              | + sex<br>n= 18,482 |              |
|-----------|------------------------------|-----------|-------------------------------|-----------|-------------------|--------------|--------------------|--------------|
|           | $\beta$                      | CI 95     | $\beta$                       | CI 95     | $\beta$           | CI 95        | $\beta$            | CI 95        |
| 2001      | 0                            |           | 0.09                          | 0.09-0.10 | 0                 |              | 0                  |              |
| 2002      | 0.15                         | 0.06-0.23 |                               |           | 0.18              | 0.10-0.27    | 0.18               | 0.09-0.27    |
| 2003      | 0.25                         | 0.16-0.33 |                               |           | 0.30              | 0.21-0.38    | 0.30               | 0.22-0.38    |
| 2004      | 0.31                         | 0.22-0.39 |                               |           | 0.40              | 0.32-0.48    | 0.40               | 0.32-0.48    |
| 2005      | 0.47                         | 0.38-0.55 |                               |           | 0.52              | 0.44-0.60    | 0.52               | 0.44-0.60    |
| 2006      | 0.49                         | 0.41-0.58 |                               |           | 0.54              | 0.46-0.62    | 0.54               | 0.46-0.62    |
| 2007      | 0.52                         | 0.43-0.60 |                               |           | 0.62              | 0.54-0.71    | 0.62               | 0.54-0.71    |
| 2008      | 0.73                         | 0.64-0.82 |                               |           | 0.89              | 0.80-0.98    | 0.89               | 0.80-0.98    |
| 2009      | 0.81                         | 0.72-0.90 |                               |           | 1.01              | 0.91-1.10    | 1.01               | 0.91-1.10    |
| Age       |                              |           |                               |           |                   |              |                    |              |
| Ref: < 50 |                              |           |                               |           | 0                 |              | 0                  |              |
| 50-59     |                              |           |                               |           | -0.06             | -0.13-0.01   | -0.06              | -0.13-0.01   |
| 60-79     |                              |           |                               |           | -0.49             | -0.55(-0.42) | -0.47              | -0.53(-0.40) |
| >80       |                              |           |                               |           | -2.22             | -2.31(-2.13) | -2.16              | -2.25(-2.07) |
| Sex       |                              |           |                               |           |                   |              |                    |              |
| Men       |                              |           |                               |           |                   |              | 0                  |              |
| Women     |                              |           |                               |           |                   |              | -0.22              | -0.26(-0.18) |

## 4.2.b PCI

| NSTEMI       | Year categorical<br>n=11,915 |            | Year continuous<br>n=11,915 |           | + age<br>n=11,680 |              | + sex<br>n=11,680 |              | + Number of occluded<br>vessels and main trunk<br>disease<br>n=7,592 |              |
|--------------|------------------------------|------------|-----------------------------|-----------|-------------------|--------------|-------------------|--------------|----------------------------------------------------------------------|--------------|
|              | $\beta$                      | CI 95      | $\beta$                     | CI 95     | B                 | CI 95        | $\beta$           | CI 95        | B                                                                    | CI 95        |
| 2001         | 0                            |            | 0.03                        | 0.02-0.04 | 0                 |              | 0                 |              | 0                                                                    |              |
| 2002         | 0.004                        | -0.14-0.15 |                             |           | 0.01              | -0.13-0.16   | 0.01              | -0.14-0.16   | -0.12                                                                | -0.32-0.08   |
| 2003         | 0.06                         | -0.08-0.20 |                             |           | 0.05              | -0.09-0.19   | 0.05              | -0.06-0.22   | 0.01                                                                 | -0.20-0.17   |
| 2004         | 0.11                         | -0.02-0.25 |                             |           | 0.12              | -0.02-0.25   | 0.12              | -0.02-0.25   | -0.02                                                                | -0.21-0.17   |
| 2005         | 0.17                         | 0.04-0.31  |                             |           | 0.17              | 0.04-0.31    | 0.17              | 0.04-0.32    | 0.005                                                                | -0.18-0.17   |
| 2006         | 0.12                         | -0.02-0.25 |                             |           | 0.14              | 0.002-0.27   | 0.14              | 0.01-0.28    | -0.07                                                                | -0.25-0.11   |
| 2007         | 0.03                         | -0.11-0.17 |                             |           | 0.03              | -0.11-0.17   | 0.04              | -0.10-0.17   | -0.12                                                                | -0.30-0.06   |
| 2008         | 0.12                         | -0.01-0.26 |                             |           | 0.14              | 0.001-0.28   | 0.14              | 0.01-0.29    | 0.06                                                                 | -0.12-0.24   |
| 2009         | 0.35                         | 0.21-0.49  |                             |           | 0.39              | 0.25-0.53    | 0.39              | 0.25-0.53    | 0.22                                                                 | 0.04-0.41    |
| Age          |                              |            |                             |           |                   |              |                   |              |                                                                      |              |
| (ref = < 50) |                              |            |                             |           | 0                 |              | 0                 |              | 0                                                                    |              |
| 50-59        |                              |            |                             |           | 0.07              | -0.02-0.17   | 0.07              | -0.04-0.14   | -0.04                                                                | -0.14-0.07   |
| 60-79        |                              |            |                             |           | -0.24             | -0.33(-0.16) | -0.23             | -0.33(-0.17) | -0.22                                                                | -0.31(-0.12) |
| >80          |                              |            |                             |           | -0.28             | -0.39(-0.16) | -0.24             | -0.37(-0.14) | -0.20                                                                | -0.33(-0.06) |
| Sex          |                              |            |                             |           |                   |              |                   |              |                                                                      |              |
| (ref=men)    |                              |            |                             |           |                   |              | 0                 |              | 0                                                                    |              |
| Women        |                              |            |                             |           |                   |              | -0.24             | -0.29(-0.18) | -0.06                                                                | -0.13-0.003  |
| LMCA         |                              |            |                             |           |                   |              |                   |              |                                                                      |              |
| involvement  |                              |            |                             |           |                   |              |                   |              |                                                                      |              |
| (ref=no)     |                              |            |                             |           |                   |              |                   |              | 0                                                                    |              |
| Yes          |                              |            |                             |           |                   |              |                   |              | 0.81                                                                 | 0.51-1.11    |
| Number of    |                              |            |                             |           |                   |              |                   |              |                                                                      |              |
| occluded     |                              |            |                             |           |                   |              |                   |              |                                                                      |              |
| vessels      |                              |            |                             |           |                   |              |                   |              | 0                                                                    |              |
| (ref=1)      |                              |            |                             |           |                   |              |                   |              | -0.13                                                                | -0.19(-0.06) |
| 2            |                              |            |                             |           |                   |              |                   |              | -1.33                                                                | -1.42(-1.24) |
| 3            |                              |            |                             |           |                   |              |                   |              |                                                                      |              |



## 4.2.c CABG

| NSTEMI                                      | Year categorical<br>n=11,915 |               | Year continuous<br>n=11,915 |               | + age<br>n=11,680 |               | + sex<br>n=11,680 |               | + Number of occluded<br>vessels and main trunk<br>disease<br>n=7,592 |               |
|---------------------------------------------|------------------------------|---------------|-----------------------------|---------------|-------------------|---------------|-------------------|---------------|----------------------------------------------------------------------|---------------|
| Year                                        | $\beta$                      | CI 95         | $\beta$                     | CI 95         | B                 | CI 95         | $\beta$           | CI 95         | $\beta$                                                              | CI 95         |
| 2001                                        | 0                            |               | -0.09                       | -0.11-(-0.07) | 0                 |               | 0                 |               | 0                                                                    |               |
| 2002                                        | 0.04                         | -0.20-0.24    |                             |               | -0.02             | -0.23-0.20    | -0.03             | -0.24-0.19    | 0.21                                                                 | -0.09-0.51    |
| 2003                                        | -0.19                        | -0.40-0.03    |                             |               | -0.19             | -0.40-0.03    | -0.19             | -0.41-0.03    | 0.13                                                                 | -0.17-0.42    |
| 2004                                        | -0.29                        | -0.50-(-0.07) |                             |               | -0.29             | -0.51-(-0.07) | -0.30             | -0.52-(-0.08) | -0.01                                                                | -0.31-0.29    |
| 2005                                        | -0.38                        | -0.59-(-0.16) |                             |               | -0.36             | -0.57-(-0.14) | -0.37             | -0.58-(-0.15) | -0.06                                                                | -0.35-0.22    |
| 2006                                        | -0.59                        | -0.81-(-0.36) |                             |               | -0.57             | -0.79-(-0.35) | -0.58             | -0.80-(-0.35) | -0.46                                                                | -0.77-(-0.16) |
| 2007                                        | -0.37                        | -0.58-(-0.15) |                             |               | -0.36             | -0.57-(-0.15) | -0.35             | -0.56-(-0.13) | 0.05                                                                 | -0.34-0.23    |
| 2008                                        | -0.59                        | -0.80-(-0.37) |                             |               | -0.58             | -0.79-(-0.36) | -0.57             | -0.80-(-0.37) | -0.31                                                                | -0.61-(-0.02) |
| 2009                                        | -0.69                        | -0.91-(-0.47) |                             |               | -0.69             | -0.91-(-0.46) | -0.70             | -0.93-(-0.48) | -0.25                                                                | -0.55-0.05    |
| Age<br>(ref = < 50)                         |                              |               |                             |               | 0                 |               | 0                 |               | 0                                                                    |               |
| 50-59                                       |                              |               |                             |               | 0.70              | 0.46-0.95     | 0.69              | 0.45-0.93     | 0.25                                                                 | -0.03-0.54    |
| 60-79                                       |                              |               |                             |               | 1.30              | 1.07-1.52     | 1.34              | 1.12-1.56     | 0.31                                                                 | -0.05-0.58    |
| >80                                         |                              |               |                             |               | 0.45              | 0.16-0.74     | 0.57              | 0.27-0.86     | -1.07                                                                | -1.44-(-0.69) |
| Sex<br>(ref=men)                            |                              |               |                             |               |                   |               |                   |               | 0                                                                    |               |
| Women                                       |                              |               |                             |               |                   |               |                   |               | -0.59                                                                | -0.70-(-0.48) |
| LMCA<br>involve-<br>ment<br>(ref=no)        |                              |               |                             |               |                   |               |                   |               | 0                                                                    |               |
| Yes                                         |                              |               |                             |               |                   |               |                   |               | -0.74                                                                | -0.97-(-0.52) |
| Number of<br>occluded<br>vessels<br>(ref=1) |                              |               |                             |               |                   |               |                   |               | 0                                                                    |               |
| 2                                           |                              |               |                             |               |                   |               |                   |               | 2.04                                                                 | 1.73-2.34     |
| 3                                           |                              |               |                             |               |                   |               |                   |               | 3.76                                                                 | 3.47-4.04     |

## Appendix 5: Additional result for unstable angina

### 5.1. Results from the Fine Grey model for unstable angina at 3 days (CAG/PCI) and 7 days (CABG)

#### 5.1.a CAG

| Unstable angina           | Year categorical<br>n =15,469 |           | Year continuous<br>n =15,469 |           | + fixed treatment protocols<br>n =15,469 |            | + age<br>n=14,913 |               | + sex<br>n= 14,913 |               |
|---------------------------|-------------------------------|-----------|------------------------------|-----------|------------------------------------------|------------|-------------------|---------------|--------------------|---------------|
|                           | $\beta$                       | CI 95     | $\beta$                      | CI 95     | $\beta$                                  | CI 95      | $\beta$           | CI 95         | $\beta$            | CI 95         |
| Year                      |                               |           |                              |           |                                          |            |                   |               |                    |               |
| 2001                      | 0                             |           | 0.18                         | 0.17-0.19 | 0.18                                     | 0.17-0.20  | 0.18              | 0.16-0.19     | 0.18               | 0.16-0.20     |
| 2002                      | 0.20                          | 0.03-0.38 |                              |           |                                          |            |                   |               |                    |               |
| 2003                      | 0.42                          | 0.25-0.59 |                              |           |                                          |            |                   |               |                    |               |
| 2004                      | 0.41                          | 0.23-0.58 |                              |           |                                          |            |                   |               |                    |               |
| 2005                      | 0.72                          | 0.56-0.89 |                              |           |                                          |            |                   |               |                    |               |
| 2006                      | 0.87                          | 0.71-1.04 |                              |           |                                          |            |                   |               |                    |               |
| 2007                      | 1.07                          | 0.91-1.23 |                              |           |                                          |            |                   |               |                    |               |
| 2008                      | 1.31                          | 1.16-1.48 |                              |           |                                          |            |                   |               |                    |               |
| 2009                      | 1.41                          | 1.25-1.56 |                              |           |                                          |            |                   |               |                    |               |
| Fixed treatment protocols |                               |           |                              |           | -0.04                                    | -0.16-0.07 | -0.04             | -0.16-0.08    | -0.04              | -0.16-0.08    |
| Age                       |                               |           |                              |           |                                          |            |                   |               |                    |               |
| Ref: < 50                 |                               |           |                              |           |                                          |            | 0                 |               | 0                  |               |
| 50-59                     |                               |           |                              |           |                                          |            | 0.21              | 0.10-0.32     | 0.21               | 0.10-0.32     |
| 60-79                     |                               |           |                              |           |                                          |            | 0.30              | 0.20-0.40     | 0.32               | 0.23-0.42     |
| >80                       |                               |           |                              |           |                                          |            | -0.51             | -0.66-(-0.35) | -0.43              | -0.58-(-0.27) |
| Sex                       |                               |           |                              |           |                                          |            |                   |               |                    |               |
| Men                       |                               |           |                              |           |                                          |            |                   |               | 0                  |               |
| Women                     |                               |           |                              |           |                                          |            |                   |               | -0.34              | -0.42-(-0.27) |

#### 5.1.b PCI

| Unstable angina            | Year categorical<br>n=4,410 |            | Year continuous<br>n=4,410 |           | + fixed treatment protocols<br>n=4,410 |            | + age<br>n=4,299 |               | + sex<br>n=4,299 |               | + Number of occluded vessels and main trunk disease<br>n=2,776 |               |
|----------------------------|-----------------------------|------------|----------------------------|-----------|----------------------------------------|------------|------------------|---------------|------------------|---------------|----------------------------------------------------------------|---------------|
|                            | $\beta$                     | CI 95      | $\beta$                    | CI 95     | $\beta$                                | CI 95      | $\beta$          | CI 95         | $\beta$          | CI 95         | $\beta$                                                        | CI 95         |
| Year                       |                             |            |                            |           |                                        |            |                  |               |                  |               |                                                                |               |
| 2001                       | 0                           |            | 0.11                       | 0.08-0.14 | 0.11                                   | 0.08-0.15  | 0.12             | 0.08-0.15     | 0.12             | 0.08-0.15     | 0.12                                                           | 0.08-0.16     |
| 2002                       | 0.12                        | -0.24-0.47 |                            |           |                                        |            |                  |               |                  |               |                                                                |               |
| 2003                       | 0.19                        | -0.17-0.54 |                            |           |                                        |            |                  |               |                  |               |                                                                |               |
| 2004                       | -0.38                       | -0.79-0.04 |                            |           |                                        |            |                  |               |                  |               |                                                                |               |
| 2005                       | 0.45                        | 0.12-0.79  |                            |           |                                        |            |                  |               |                  |               |                                                                |               |
| 2006                       | 0.46                        | 0.13-0.79  |                            |           |                                        |            |                  |               |                  |               |                                                                |               |
| 2007                       | 0.46                        | 0.13-0.80  |                            |           |                                        |            |                  |               |                  |               |                                                                |               |
| 2008                       | 0.76                        | 0.46-1.06  |                            |           |                                        |            |                  |               |                  |               |                                                                |               |
| 2009                       | 0.76                        | 0.45-1.07  |                            |           |                                        |            |                  |               |                  |               |                                                                |               |
| Fixed treatment protocols  |                             |            |                            |           | -0.03                                  | -0.26-0.20 | -0.02            | -0.25-0.22    | -0.01            | -0.24-0.23    | 0.003                                                          | -0.25-0.24    |
| Age                        |                             |            |                            |           |                                        |            |                  |               |                  |               |                                                                |               |
| (ref = < 50)               |                             |            |                            |           |                                        |            | 0                |               | 0                |               | 0                                                              |               |
| 50-59                      |                             |            |                            |           |                                        |            | 0.01             | -0.22-0.24    | -0.01            | -0.22-0.24    | -0.17                                                          | -0.42-0.07    |
| 60-79                      |                             |            |                            |           |                                        |            | -0.25            | -0.46-(-0.03) | -0.24            | -0.45-(-0.02) | -0.35                                                          | -0.59-(-0.12) |
| >80                        |                             |            |                            |           |                                        |            | -0.17            | -0.50-0.15    | -0.13            | -0.44-(-0.20) | -0.22                                                          | -0.57-0.12    |
| Sex                        |                             |            |                            |           |                                        |            |                  |               |                  |               |                                                                |               |
| (ref=men)                  |                             |            |                            |           |                                        |            |                  |               | 0                |               | 0                                                              |               |
| Women                      |                             |            |                            |           |                                        |            |                  |               | -0.28            | -0.43-(-0.12) | -0.09                                                          | -0.26-0.08    |
| LMCA involvement           |                             |            |                            |           |                                        |            |                  |               |                  |               |                                                                |               |
| (ref=no)                   |                             |            |                            |           |                                        |            |                  |               |                  |               | 0                                                              |               |
| Yes                        |                             |            |                            |           |                                        |            |                  |               |                  |               | 0.59                                                           | -0.08-1.27    |
| Number of occluded vessels |                             |            |                            |           |                                        |            |                  |               |                  |               |                                                                |               |
| (ref=1)                    |                             |            |                            |           |                                        |            |                  |               |                  |               | 0                                                              |               |
| 2                          |                             |            |                            |           |                                        |            |                  |               |                  |               | -0.31                                                          | -0.49-(-0.13) |
| 3                          |                             |            |                            |           |                                        |            |                  |               |                  |               | -1.30                                                          | -1.57-(-1.03) |

5.1.c CABG

| Unstable angina                    | Year categorical n=4,410 |              | Year continuous n=4,410 |              | + fixed treatment protocols n=4,458 |              | + age n=4,299 |              | + sex n=4,299 |              | + Number of occluded vessels and main trunk disease n=2,776 |              |
|------------------------------------|--------------------------|--------------|-------------------------|--------------|-------------------------------------|--------------|---------------|--------------|---------------|--------------|-------------------------------------------------------------|--------------|
| Year                               | $\beta$                  | CI 95        | $\beta$                 | CI 95        | $\beta$                             | CI 95        | B             | CI 95        | $\beta$       | CI 95        | $\beta$                                                     | CI 95        |
| 2001                               | 0                        |              | -0.17                   | -0.21(-0.13) | -0.16                               | -0.21(-0.11) | -0.17         | -0.22(-0.12) | -0.16         | -0.21(-0.11) | -0.12                                                       | -0.18(-0.06) |
| 2002                               | -0.004                   | -0.39-0.38   |                         |              |                                     |              |               |              |               |              |                                                             |              |
| 2003                               | -0.02                    | -0.41-0.37   |                         |              |                                     |              |               |              |               |              |                                                             |              |
| 2004                               | -0.15                    | -0.56-0.25   |                         |              |                                     |              |               |              |               |              |                                                             |              |
| 2005                               | -0.83                    | -1.32(-0.35) |                         |              |                                     |              |               |              |               |              |                                                             |              |
| 2006                               | -0.76                    | -1.24(-0.29) |                         |              |                                     |              |               |              |               |              |                                                             |              |
| 2007                               | -1.00                    | -1.51(-0.48) |                         |              |                                     |              |               |              |               |              |                                                             |              |
| 2008                               | -0.89                    | -1.33(-0.45) |                         |              |                                     |              |               |              |               |              |                                                             |              |
| 2009                               | -1.40                    | -1.95(-0.81) |                         |              |                                     |              |               |              |               |              |                                                             |              |
| Fixed treatment protocols          |                          |              |                         |              | -0.21                               | -0.79-0.36   | -0.22         | -0.79-0.36   | -0.21         | -0.78-0.37   | -0.56                                                       | -1.42-0.30   |
| Age (ref = < 50)                   |                          |              |                         |              |                                     |              |               |              |               |              |                                                             |              |
| 50-59                              |                          |              |                         |              |                                     |              | 0             |              | 0             |              | 0                                                           |              |
| 60-79                              |                          |              |                         |              |                                     |              | 0.50          | -0.07-1.06   | 0.48          | -0.08-1.04   | -0.11                                                       | 0.74-0.52    |
| >80                                |                          |              |                         |              |                                     |              | 1.26          | 0.76-1.77    | 1.29          | 0.79-1.80    | 0.20                                                        | -0.37-0.77   |
|                                    |                          |              |                         |              |                                     |              | 0.92          | 0.26-1.58    | 1.02          | 0.37-1.69    | -0.69                                                       | -1.55-0.16   |
| Sex (ref=men)                      |                          |              |                         |              |                                     |              |               |              |               |              |                                                             |              |
| Women                              |                          |              |                         |              |                                     |              |               |              | 0             |              | 0                                                           |              |
|                                    |                          |              |                         |              |                                     |              |               |              | -0.63         | -0.90(-0.36) | -0.32                                                       | -0.65-0.02   |
| LMCA involvement (ref=no)          |                          |              |                         |              |                                     |              |               |              |               |              |                                                             |              |
| Yes                                |                          |              |                         |              |                                     |              |               |              |               |              | 0                                                           |              |
|                                    |                          |              |                         |              |                                     |              |               |              |               |              | -1.12                                                       | -1.48(-0.76) |
| Number of occluded vessels (ref=1) |                          |              |                         |              |                                     |              |               |              |               |              |                                                             |              |
| 2                                  |                          |              |                         |              |                                     |              |               |              |               |              | 0                                                           |              |
| 3                                  |                          |              |                         |              |                                     |              |               |              |               |              | 2.31                                                        | 1.57-3.06    |
|                                    |                          |              |                         |              |                                     |              |               |              |               |              | 3.40                                                        | 2.68-4.11    |

5.2. Results from the Fine Grey model for unstable angina at 60 days

5.2.a CAG

| Unstable angina | Year categorical n=15,469 |            | Year continuous n=15,469 |           | + age n=14,913 |              | + sex n= 14,913 |              |
|-----------------|---------------------------|------------|--------------------------|-----------|----------------|--------------|-----------------|--------------|
| Year            | $\beta$                   | CI 95      | $\beta$                  | CI 95     | $\beta$        | CI 95        | $\beta$         | CI 95        |
| 2001            | 0                         |            | 0.11                     | 0.10-0.12 | 0              |              | 0               |              |
| 2002            | 0.03                      | -0.06-0.12 |                          |           | 0.08           | -0.01-0.18   | 0.09            | -0.004-0.18  |
| 2003            | 0.09                      | 0.01-0.20  |                          |           | 0.11           | 0.02-0.21    | 0.11            | 0.02-0.21    |
| 2004            | 0.20                      | 0.10-0.28  |                          |           | 0.23           | 0.14-0.32    | 0.24            | 0.15-0.33    |
| 2005            | 0.29                      | 0.16-0.35  |                          |           | 0.33           | 0.23-0.42    | 0.33            | 0.24-0.42    |
| 2006            | 0.44                      | 0.29-0.48  |                          |           | 0.44           | 0.35-0.54    | 0.45            | 0.35-0.54    |
| 2007            | 0.58                      | 0.45-0.64  |                          |           | 0.56           | 0.46-0.65    | 0.57            | 0.47-0.67    |
| 2008            | 0.82                      | 0.66-0.86  |                          |           | 0.81           | 0.71-0.90    | 0.81            | 0.72-0.91    |
| 2009            | 0.78                      | 0.63-0.83  |                          |           | 0.77           | 0.67-0.87    | 0.78            | 0.68-0.88    |
| Age             |                           |            |                          |           |                |              |                 |              |
| Ref: < 50       |                           |            |                          |           | 0              |              | 0               |              |
| 50-59           |                           |            |                          |           | 0.43           | 0.36-0.50    | 0.44            | 0.36-0.51    |
| 60-79           |                           |            |                          |           | 0.48           | 0.41-0.54    | 0.50            | 0.43-0.57    |
| >80             |                           |            |                          |           | -0.61          | -0.72(-0.51) | -0.55           | -0.65(-0.44) |
| Sex             |                           |            |                          |           |                |              |                 |              |
| Men             |                           |            |                          |           |                |              | 0               |              |
| Women           |                           |            |                          |           |                |              | -0.27           | -0.32(-0.23) |

## 5.2.b PCI

| Unstable<br>angina                          | Year categorical<br>n=4,410 |               | Year continuous<br>n=4,410 |           | + age<br>n=4,299 |               | + sex<br>n=4,299 |               | + Number of occluded<br>vessels and main trunk<br>disease<br>n=2,776 |               |
|---------------------------------------------|-----------------------------|---------------|----------------------------|-----------|------------------|---------------|------------------|---------------|----------------------------------------------------------------------|---------------|
|                                             | $\beta$                     | CI 95         | $\beta$                    | CI 95     | $\beta$          | CI 95         | $\beta$          | CI 95         | B                                                                    | CI 95         |
| 2001                                        | 0                           |               | 0.02                       | 0.00-0.04 | 0                |               | 0                |               | 0                                                                    |               |
| 2002                                        | -0.12                       | -0.29-0.06    |                            |           | -0.13            | -0.31-0.05    | -0.13            | -0.31-0.05    | -0.07                                                                | -0.26-0.12    |
| 2003                                        | -0.08                       | -0.26-0.09    |                            |           | -0.10            | -0.28-0.08    | -0.10            | -0.28-0.08    | -0.04                                                                | -0.23-0.16    |
| 2004                                        | -0.30                       | -0.49-(-0.12) |                            |           | -0.30            | -0.48-(-0.11) | -0.29            | -0.48-(-0.10) | -0.15                                                                | -0.35-0.05    |
| 2005                                        | 0.04                        | -0.14-0.21    |                            |           | 0.04             | -0.13-0.22    | 0.04             | -0.13-0.22    | 0.06                                                                 | -0.13-0.25    |
| 2006                                        | 0.01                        | -0.16-0.18    |                            |           | -0.02            | -0.19-0.16    | -0.02            | -0.20-0.15    | 0.03                                                                 | -0.15-0.21    |
| 2007                                        | -0.06                       | -0.24-0.12    |                            |           | -0.10            | -0.28-0.09    | -0.09            | -0.27-0.09    | 0.004                                                                | -0.19-0.20    |
| 2008                                        | 0.04                        | -0.13-0.21    |                            |           | 0.05             | -0.12-0.22    | 0.05             | -0.11-0.22    | 0.19                                                                 | 0.003-0.37    |
| 2009                                        | 0.10                        | -0.08-0.28    |                            |           | 0.08             | -0.10-0.26    | 0.09             | -0.09-0.27    | 0.30                                                                 | 0.11-0.50     |
| Age<br>(ref = < 50)                         |                             |               |                            |           | 0                |               | 0                |               | 0                                                                    |               |
| 50-59                                       |                             |               |                            |           | 0.19             | 0.04-0.34     | 0.19             | 0.03-0.34     | -0.01                                                                | -0.19-0.16    |
| 60-79                                       |                             |               |                            |           | 0.04             | -0.10-0.18    | 0.05             | -0.09-0.18    | -0.12                                                                | -0.31-0.02    |
| >80                                         |                             |               |                            |           | 0.17             | 0.02-0.37     | 0.19             | 0.002-0.39    | -0.01                                                                | -0.26-0.20    |
| Sex<br>(ref=men)                            |                             |               |                            |           |                  |               |                  |               | 0                                                                    |               |
| Women                                       |                             |               |                            |           |                  |               |                  |               | -0.13                                                                | -0.22-(-0.04) |
| LMCA<br>involvement<br>(ref=no)             |                             |               |                            |           |                  |               |                  |               | 0                                                                    |               |
| Yes                                         |                             |               |                            |           |                  |               |                  |               | 1.25                                                                 | 0.85-1.78     |
| Number of<br>occluded<br>vessels<br>(ref=1) |                             |               |                            |           |                  |               |                  |               | 0                                                                    |               |
| 2                                           |                             |               |                            |           |                  |               |                  |               | -0.22                                                                | -0.33-(-0.11) |
| 3                                           |                             |               |                            |           |                  |               |                  |               | -1.45                                                                | -1.62-(-1.31) |

## 5.2.b CABG

| Unstable<br>angina                          | Year categorical<br>n=4,410 |               | Year continuous<br>n=4,410 |               | + age<br>n=4,299 |                | + sex<br>n=4,299 |               | + Number of occluded<br>vessels and main trunk<br>disease<br>n=2,776 |               |
|---------------------------------------------|-----------------------------|---------------|----------------------------|---------------|------------------|----------------|------------------|---------------|----------------------------------------------------------------------|---------------|
|                                             | $\beta$                     | CI 95         | $\beta$                    | CI 95         | B                | CI 95          | $\beta$          | CI 95         | $\beta$                                                              | CI 95         |
| 2001                                        | 0                           |               | -0.13                      | -0.16-(-0.10) | 0                |                | 0                |               | 0                                                                    |               |
| 2002                                        | 0.08                        | -0.17-0.32    |                            |               | -0.06            | -0.20-0.31     | 0.06             | -0.20-0.31    | 0.01                                                                 | -0.30-0.31    |
| 2003                                        | -0.13                       | -0.40-0.13    |                            |               | -0.16            | -0.43-0.11     | -0.14            | -0.42-0.13    | 0.34                                                                 | 0.02-0.66     |
| 2004                                        | -0.28                       | -0.56-0.002   |                            |               | -0.29            | -0.57-(-0.003) | -0.24            | -0.52-0.05    | -0.19                                                                | -0.55-(-0.16) |
| 2005                                        | -0.64                       | -0.93-(-0.34) |                            |               | -0.69            | -0.98-(-0.39)  | -0.68            | -0.98-(-0.39) | -0.55                                                                | -0.90-(-0.20) |
| 2006                                        | -0.61                       | -0.90-(-0.32) |                            |               | -0.60            | -0.90-(-0.31)  | -0.61            | -0.90-(-0.32) | -0.42                                                                | -0.77-(-0.06) |
| 2007                                        | -0.56                       | -0.85-(-0.27) |                            |               | -0.56            | -0.85-(-0.26)  | -0.53            | -0.82-(-0.24) | -0.42                                                                | -0.78-(-0.05) |
| 2008                                        | -0.84                       | -1.13-(-0.56) |                            |               | -0.87            | -1.16-(-0.59)  | -0.86            | -1.15-(-0.58) | -0.41                                                                | -0.77-(-0.05) |
| 2009                                        | -0.95                       | -1.26-(-0.63) |                            |               | -0.98            | -1.30-(-0.66)  | -0.96            | -1.27-(-0.64) | -0.43                                                                | -0.80-(-0.05) |
| Age<br>(ref = < 50)                         |                             |               |                            |               | 0                |                | 0                |               | 0                                                                    |               |
| 50-59                                       |                             |               |                            |               | 0.80             | 0.44-1.16      | 0.79             | 0.43-1.15     | 0.26                                                                 | -0.18-0.70    |
| 60-79                                       |                             |               |                            |               | 1.41             | 1.07-1.74      | 1.45             | 1.11-1.78     | 0.43                                                                 | 0.01-0.84     |
| >80                                         |                             |               |                            |               | 0.75             | 0.30-1.20      | 0.87             | 0.41-1.32     | -0.97                                                                | -1.59-(-0.36) |
| Sex<br>(ref=men)                            |                             |               |                            |               |                  |                |                  |               | 0                                                                    |               |
| Women                                       |                             |               |                            |               |                  |                |                  |               | -0.66                                                                | -0.83-(-0.49) |
| LMCA<br>involve-<br>ment<br>(ref=no)        |                             |               |                            |               |                  |                |                  |               | 0                                                                    |               |
| Yes                                         |                             |               |                            |               |                  |                |                  |               | -1.03                                                                | -1.31-(-0.76) |
| Number of<br>occluded<br>vessels<br>(ref=1) |                             |               |                            |               |                  |                |                  |               | 0                                                                    |               |
| 2                                           |                             |               |                            |               |                  |                |                  |               | 2.11                                                                 | 1.71-2.52     |
| 3                                           |                             |               |                            |               |                  |                |                  |               | 3.51                                                                 | 3.12-3.89     |

## STROBE Statement—checklist of items that should be included in reports of observational studies

|                              | Item No | Recommendation                                                                                                                                                                                                                                                                                                                                                                                                                                                                                                                                                                                                                                                                                   |   |
|------------------------------|---------|--------------------------------------------------------------------------------------------------------------------------------------------------------------------------------------------------------------------------------------------------------------------------------------------------------------------------------------------------------------------------------------------------------------------------------------------------------------------------------------------------------------------------------------------------------------------------------------------------------------------------------------------------------------------------------------------------|---|
| <b>Title and abstract</b>    | 1       | (a) Indicate the study's design with a commonly used term in the title or the abstract<br>(b) Provide in the abstract an informative and balanced summary of what was done and what was found                                                                                                                                                                                                                                                                                                                                                                                                                                                                                                    | ✓ |
| <b>Introduction</b>          |         |                                                                                                                                                                                                                                                                                                                                                                                                                                                                                                                                                                                                                                                                                                  |   |
| Background/rationale         | 2       | Explain the scientific background and rationale for the investigation being reported                                                                                                                                                                                                                                                                                                                                                                                                                                                                                                                                                                                                             | ✓ |
| Objectives                   | 3       | State specific objectives, including any prespecified hypotheses                                                                                                                                                                                                                                                                                                                                                                                                                                                                                                                                                                                                                                 | ✓ |
| <b>Methods</b>               |         |                                                                                                                                                                                                                                                                                                                                                                                                                                                                                                                                                                                                                                                                                                  |   |
| Study design                 | 4       | Present key elements of study design early in the paper                                                                                                                                                                                                                                                                                                                                                                                                                                                                                                                                                                                                                                          | ✓ |
| Setting                      | 5       | Describe the setting, locations, and relevant dates, including periods of recruitment, exposure, follow-up, and data collection                                                                                                                                                                                                                                                                                                                                                                                                                                                                                                                                                                  | ✓ |
| Participants                 | 6       | (a) <i>Cohort study</i> —Give the eligibility criteria, and the sources and methods of selection of participants. Describe methods of follow-up<br><i>Case-control study</i> —Give the eligibility criteria, and the sources and methods of case ascertainment and control selection. Give the rationale for the choice of cases and controls<br><i>Cross-sectional study</i> —Give the eligibility criteria, and the sources and methods of selection of participants<br>(b) <i>Cohort study</i> —For matched studies, give matching criteria and number of exposed and unexposed<br><i>Case-control study</i> —For matched studies, give matching criteria and the number of controls per case | ✓ |
| Variables                    | 7       | Clearly define all outcomes, exposures, predictors, potential confounders, and effect modifiers. Give diagnostic criteria, if applicable                                                                                                                                                                                                                                                                                                                                                                                                                                                                                                                                                         | ✓ |
| Data sources/<br>measurement | 8*      | For each variable of interest, give sources of data and details of methods of assessment (measurement). Describe comparability of assessment methods if there is more than one group                                                                                                                                                                                                                                                                                                                                                                                                                                                                                                             | ✓ |
| Bias                         | 9       | Describe any efforts to address potential sources of bias                                                                                                                                                                                                                                                                                                                                                                                                                                                                                                                                                                                                                                        | ✓ |
| Study size                   | 10      | Explain how the study size was arrived at                                                                                                                                                                                                                                                                                                                                                                                                                                                                                                                                                                                                                                                        | ✓ |
| Quantitative variables       | 11      | Explain how quantitative variables were handled in the analyses. If applicable, describe which groupings were chosen and why                                                                                                                                                                                                                                                                                                                                                                                                                                                                                                                                                                     | ✓ |
| Statistical methods          | 12      | (a) Describe all statistical methods, including those used to control for confounding<br>(b) Describe any methods used to examine subgroups and interactions<br>(c) Explain how missing data were addressed<br>(d) <i>Cohort study</i> —If applicable, explain how loss to follow-up was addressed<br><i>Case-control study</i> —If applicable, explain how matching of cases and controls was addressed<br><i>Cross-sectional study</i> —If applicable, describe analytical methods taking account of sampling strategy<br>(e) Describe any sensitivity analyses                                                                                                                                | ✓ |

Continued on next page

| <b>Results</b>           |     |                                                                                                                                                                                                                                                                                                                                                                                                               |
|--------------------------|-----|---------------------------------------------------------------------------------------------------------------------------------------------------------------------------------------------------------------------------------------------------------------------------------------------------------------------------------------------------------------------------------------------------------------|
| Participants             | 13* | (a) Report numbers of individuals at each stage of study—eg numbers potentially eligible, examined for eligibility, confirmed eligible, included in the study, completing follow-up, and analysed<br>(b) Give reasons for non-participation at each stage<br>(c) Consider use of a flow diagram                                                                                                               |
| Descriptive data         | 14* | (a) Give characteristics of study participants (eg demographic, clinical, social) and information on exposures and potential confounders<br>(b) Indicate number of participants with missing data for each variable of interest<br>(c) <i>Cohort study</i> —Summarise follow-up time (eg, average and total amount)                                                                                           |
| Outcome data             | 15* | <i>Cohort study</i> —Report numbers of outcome events or summary measures over time<br><i>Case-control study</i> —Report numbers in each exposure category, or summary measures of exposure<br><i>Cross-sectional study</i> —Report numbers of outcome events or summary measures                                                                                                                             |
| Main results             | 16  | (a) Give unadjusted estimates and, if applicable, confounder-adjusted estimates and their precision (eg, 95% confidence interval). Make clear which confounders were adjusted for and why they were included<br>(b) Report category boundaries when continuous variables were categorized<br>(c) If relevant, consider translating estimates of relative risk into absolute risk for a meaningful time period |
| Other analyses           | 17  | Report other analyses done—eg analyses of subgroups and interactions, and sensitivity analyses                                                                                                                                                                                                                                                                                                                |
| <b>Discussion</b>        |     |                                                                                                                                                                                                                                                                                                                                                                                                               |
| Key results              | 18  | Summarise key results with reference to study objectives                                                                                                                                                                                                                                                                                                                                                      |
| Limitations              | 19  | Discuss limitations of the study, taking into account sources of potential bias or imprecision. Discuss both direction and magnitude of any potential bias                                                                                                                                                                                                                                                    |
| Interpretation           | 20  | Give a cautious overall interpretation of results considering objectives, limitations, multiplicity of analyses, results from similar studies, and other relevant evidence                                                                                                                                                                                                                                    |
| Generalisability         | 21  | Discuss the generalisability (external validity) of the study results                                                                                                                                                                                                                                                                                                                                         |
| <b>Other information</b> |     |                                                                                                                                                                                                                                                                                                                                                                                                               |
| Funding                  | 22  | Give the source of funding and the role of the funders for the present study and, if applicable, for the original study on which the present article is based                                                                                                                                                                                                                                                 |

\*Give information separately for cases and controls in case-control studies and, if applicable, for exposed and unexposed groups in cohort and cross-sectional studies.

**Note:** An Explanation and Elaboration article discusses each checklist item and gives methodological background and published examples of transparent reporting. The STROBE checklist is best used in conjunction with this article (freely available on the Web sites of PLoS Medicine at <http://www.plosmedicine.org/>, Annals of Internal Medicine at <http://www.annals.org/>, and Epidemiology at <http://www.epidem.com/>). Information on the STROBE Initiative is available at [www.strobe-statement.org](http://www.strobe-statement.org).



**Trends in time to invasive examination and treatment from 2001 to 2009 in patients admitted first time with non ST-elevation Myocardial Infarction or unstable angina in Denmark.**

|                                 |                                                                                                                                                                                                                                                                                                                                                                                                                                                                                                                    |
|---------------------------------|--------------------------------------------------------------------------------------------------------------------------------------------------------------------------------------------------------------------------------------------------------------------------------------------------------------------------------------------------------------------------------------------------------------------------------------------------------------------------------------------------------------------|
| Journal:                        | <i>BMJ Open</i>                                                                                                                                                                                                                                                                                                                                                                                                                                                                                                    |
| Manuscript ID:                  | bmjopen-2013-004052.R1                                                                                                                                                                                                                                                                                                                                                                                                                                                                                             |
| Article Type:                   | Research                                                                                                                                                                                                                                                                                                                                                                                                                                                                                                           |
| Date Submitted by the Author:   | 11-Nov-2013                                                                                                                                                                                                                                                                                                                                                                                                                                                                                                        |
| Complete List of Authors:       | Mårtensson, Solvej; Research Center for Prevention and Health, Gyrd-Hansen, Dorte; University of Southern Denmark, COHERE Prescott, Eva; Bispebjerg University Hospital, Department of Cardiology Andersen, Per; Institute of Public Health, 4.Department of Biostatistics Zwiler, Ann-Dorthe; National Institute of Public Health, Danish Heart Registry Osler, Merete; Capital Region of Denmark, 1. Research Centre for Prevention and Health; University of Copenhagen, Copenhagen, Institute of Public Health |
| <b>Primary Subject Heading</b>: | Epidemiology                                                                                                                                                                                                                                                                                                                                                                                                                                                                                                       |
| Secondary Subject Heading:      | Cardiovascular medicine, Epidemiology, Health services research, Health policy                                                                                                                                                                                                                                                                                                                                                                                                                                     |
| Keywords:                       | Cardiac Epidemiology < CARDIOLOGY, Coronary heart disease < CARDIOLOGY, Health policy < HEALTH SERVICES ADMINISTRATION & MANAGEMENT, Cardiac surgery < SURGERY, EPIDEMIOLOGY                                                                                                                                                                                                                                                                                                                                       |
|                                 |                                                                                                                                                                                                                                                                                                                                                                                                                                                                                                                    |

SCHOLARONE™  
Manuscripts

1  
2  
3  
4 **Title**  
5  
6  
7

8 **Trends in time to invasive examination and treatment from 2001 to 2009 in patients admitted**  
9 **first time with non ST-elevation Myocardial Infarction or unstable angina in Denmark.**  
10  
11

12  
13  
14 **Solvej Mårtensson MSc Public Health <sup>1\*</sup>, prof. Dorte Gyrd-Hansen <sup>2</sup>, prof. Eva Prescott MD,**  
15 **DMSc <sup>3</sup>, prof. Per Kragh Andersen<sup>4</sup>, Ann-Dorthe Olsen Zwisler MD PhD<sup>5</sup>, prof. Merete Osler**  
16 **MD, DMSc <sup>1,6</sup>**  
17  
18  
19  
20  
21

- 22  
23  
24 1. Research Centre for Prevention and Health, Capital Region of Denmark, Glostrup, Denmark  
25  
26 2. COHERE, University of Southern Denmark, Odense, Denmark  
27  
28 3. Department of Cardiology, Bispebjerg University Hospital, Copenhagen, Denmark  
29  
30 4. Department of Biostatistics, Institute of Public Health, University of Copenhagen,  
31  
32 Copenhagen, Denmark  
33  
34 5. Danish Heart Registry, National Institute of Public Health, University of Southern Denmark  
35  
36 6. Institute of Public Health, University of Copenhagen, Copenhagen, Denmark  
37  
38  
39  
40  
41

42 **\*Corresponding author: [solvej.maartensson@regionh.dk](mailto:solvej.maartensson@regionh.dk), telephone number: +45 38632198**  
43  
44  
45

46 **Number of words in main text: 3,873**  
47  
48  
49  
50  
51

52  
53 Keywords: acute coronary heart syndrome, NSTEMI, Unstable angina, time to treatment, time  
54 trends, cohort design  
55  
56  
57  
58  
59  
60



**Abstract**

## Objective:

To investigate trends in time to invasive examination and treatment for patient with first time diagnosis of non-ST-elevation Myocardial infarction (NSTEMI) and unstable angina in the period from 2001 to 2009 in Denmark

Design: From 1 January 2001 to 31 December 2009 all first time hospitalisations with NSTEMI and unstable angina were identified in the National Patient Registry (n=65,909). Time from admission to initiation of coronary angiography (CAG), percutaneous coronary intervention (PCI) or coronary artery bypass graft (CABG) was calculated. We described the development in invasive examination and treatment probability (CAG, PCI and CABG at 3, 7, 10, 30 and 60 days) for the years 2001 to 2009, taking the competing risk of death into account using Aalen-Johansen estimators and a Fine Gray model.

Setting: Nationwide Danish cohort

Results: The proportion of patients receiving a CAG and PCI increased substantially over time while the proportion receiving a CABG decreased for both NSTEMI and unstable angina. For both NSTEMI and unstable angina a significant increase in invasive examination and treatment probability at 3 days for CAG and PCI was seen especially from 2007 through to 2009. For NSTEMI the CAG examination probability at 3 days leaped from 20 % in 2007 to 32 % in 2008 and 39 % in 2009 and PCI the same was true with a leap in treatment probability from 19 % to 28 % from 2008 to 2009.

1  
2  
3  
4  
5  
6  
7  
8  
9  
10  
11  
12  
13  
14  
15  
16  
17  
18  
19  
20  
21  
22  
23  
24  
25  
26  
27  
28  
29  
30  
31  
32  
33  
34  
35  
36  
37  
38  
39  
40  
41  
42  
43  
44  
45  
46  
47  
48  
49  
50  
51  
52  
53  
54  
55  
56  
57  
58  
59  
60

Conclusions: In Denmark the use of CAG and PCI in treatment of NSTEMI and unstable angina has increased from 2001 to 2009 while the use of CABG has decreased. During the same period there was a marked increase in invasive examination and treatment probability at 3 days i.e. more patients were treated faster which is in line with the political aim of reducing time to treatment.

Main strengths:

- Large unselected patient population n=65,909
- Detailed register based data
- Use of statistical methods that account for competing risks
- Information on extension and severity of the disease

Main limitations:

- No information on biomarkers to validate register based data
- No information on why patients died before treatment

## Introduction

Treatment of acute coronary heart disease has advanced substantially during the latest decades, and improved clinical outcome has been seen (1). A recent register based Danish cohort study by Schmidt et al. found that short term mortality after first time hospitalisation with AMI was nearly halved from 1984 to 2008 (2). It has been suggested that part of this decline can be attributed to improved treatment including introduction of thrombolysis, coronary artery bypass grafting (CABG), percutaneous coronary intervention (PCI) and improved medical prevention after diagnosis (3). Coronary angiography (CAG) is recommended as part of the diagnostic process for all patients with acute myocardial infarction with PCI as the primary intervention (4). Since the mid nineties there has been a strong political focus on time to treatment in order to reduce case fatality (5). For coronary heart disease this focus in Denmark has among other initiatives led to the development of fixed treatment protocols for patients with non ST elevation myocardial infarction (NSTEMI) and unstable angina. These protocols were implemented during 2009. The protocol stipulates that the maximum time from admission with NSTEMI to invasive examination (CAG) should be less than 3 calendar days (72 hours) and time to appropriate invasive treatment less than 3 calendar days for PCI, and 7 calendar days for CABG (6). These protocols are based on the shared European guidelines (4, 7).

The purpose of this study is to investigate a potential explanation of the significant improvement in prognosis by describing time to invasive examination and treatment for patients with first time diagnosis of NSTEMI or unstable angina in the period from 2001 to 2009 in Denmark using a nationwide cohort design and taking into account vessel disease severity as well as using appropriate methods of analysis that account for the competing risk of death. This study is the first nationwide cohort study to describe time waited for CAG, PCI and CABG over a decade where

1  
2  
3  
4  
5  
6  
7  
8  
9  
10  
11  
12  
13  
14  
15  
16  
17  
18  
19  
20  
21  
22  
23  
24  
25  
26  
27  
28  
29  
30  
31  
32  
33  
34  
35  
36  
37  
38  
39  
40  
41  
42  
43  
44  
45  
46  
47  
48  
49  
50  
51  
52  
53  
54  
55  
56  
57  
58  
59  
60

large changes in treatment of NSTEMI and unstable angina were introduced including the introduction of fixed treatment protocols.

For peer review only

## Method

The Danish health care system provides universal coverage for all citizens. Since 1995, all contacts with the health care system including emergency, ambulatory and inpatient have been registered in the National Patient Registry (NPR) with information about time and date of admission and discharge along with information about diagnosis as well as type and date of potential invasive treatment or examination(8). Furthermore there are several registers and clinical quality databases with patient specific information (9) that can be linked with the data from the NPR through the use of the unique ten-digit person identifier. The registers used for this study are the NPR , the Danish Heart Registry, which registers information regarding patients undergoing invasive cardiac procedure (10) and the Medical Cause of Death Registry, which contains information on time and cause of death (11).

### Study population:

From January 1 2001 to December 31 2009 all first time hospitalisations of acute coronary heart syndrome (ACS) were identified in the National Patient Registry (n= 99,473) by the following ICD10 codes (I20.0 Unstable angina pectoris, I21.0-I21.3 ST-elevation myocardial infarction (STEMI), I21.4 non ST-elevation myocardial infarction (NSTEMI) and I21.9 AMI – Unspecified) using discharge diagnoses (see figure 1). Patients with prior heart disease (ICD10: I20-I25) were excluded using information from the NPR going back to 1995 (n= 19,440) leaving 80,033 patients. A previous study by Joensen et al. found that the ACS diagnosis registered in the NPR should be used with caution especially the unstable angina diagnosis (12). Joensen et al. recommend restricting the analysis to patients discharged from wards when other validation is not possible. We therefor excluded outpatients (n=2,564) and patients with a NSTEMI or unstable angina diagnosis from an emergency room that was not verified in the subsequent admission (n=11,560) still

1  
2  
3  
4 allowing for a shift from NSTEMI to unstable angina or vice versa. Consequently, the final  
5  
6 population consisted of 65.909 patients. Diagnosis can change after the result of CAG therefore we  
7  
8 used the diagnosis registered after the CAG in the analysis of time to PCI and CABG. For this  
9  
10 reason the number of patients in the different sub-diagnosis groups vary between analyses of CAG,  
11  
12 PCI and CABG (see figure 1 for distribution of patients with acute coronary heart syndrome in sub  
13  
14 diagnosis groups at initial examination and after coronary angiography). Patients with STEMI and  
15  
16 unspecified MI are only included in the initial descriptive analysis of the patient population.  
17  
18  
19  
20  
21

## 22 **Variables**

### 23 24 25 26 **Time to examination or treatment (from admission to CAG, PCI and CABG)**

27  
28 Time (measured in hours) from admission to initiation of coronary angiography (CAG),  
29  
30 percutaneous coronary intervention (PCI) or coronary artery bypass graft (CABG) was calculated  
31  
32 using information from the NPR (the specific SKS codes can be seen in appendix 1) Only treatment  
33  
34 and examination within the first 60 days after initial symptom presentation was included. Further  
35  
36 information regarding this variable can be found in appendix 2.  
37  
38  
39  
40  
41

### 42 **Severity and extent of disease**

43  
44 Severity and the extent of disease will influence the perceived urgency of treatment. Information on  
45  
46 number of occluded vessels and Left Main Coronary Artery (LMCA) involvement was available  
47  
48 from the Danish Heart Register (DHR) in 82.1% and 84.7 % of the cases that received a CAG,  
49  
50 respectively. We allowed for a slip of  $\pm 2$  days between NPR CAG date and DHR CAG date when  
51  
52 identifying CAG information.  
53  
54  
55  
56  
57  
58  
59  
60

1  
2  
3  
4 Other covariates include sex, age and year of diagnosis  
5  
6  
7

### 8 9 **Statistical methods**

10 In the descriptive analysis the number of patients receiving CAG, PCI or CABG was reported along  
11 with the number of patients receiving the respective examination or treatment within 3 days for  
12 CAG and PCI and 7 days from CAG for CABG for each diagnosis and for each of the covariates:  
13 age, sex, number of occluded vessels and LMCA involvement. When investigating time to  
14 treatment for a specific disease, it is important to account for the competing risk of death in order to  
15 account for the time waited by patients who die before they are treated (13). Reporting a median  
16 time to treatment is not relevant as it will only describe the time waited by patients who manage to  
17 be treated. Furthermore, if we wish to model cumulated probability of treatment (not intensities)  
18 and applied standard methods (e.g. Cox regression method or Kaplan Meier plots), then we would  
19 regard death without treatment as independent censoring and would only be able to make inference  
20 for a hypothetical population where patients do not die without being treated (13). The problem of  
21 competing risks is especially important for a potentially fatal disease like ACS where some sub  
22 diagnosis have a relative high mortality rate (14, 15). Furthermore, as first line invasive treatments  
23 are mutually exclusive (patients receive either PCI or CABG) we need to account for the competing  
24 risk of receiving the other treatment, respectively. To account for this competing risks problem we  
25 used Aalen-Johansen plots where we described the development in invasive examination (CAG)  
26 and treatment probability (PCI and CABG) for the years 2001 to 2009. These plots account for the  
27 competing risks of death and treatment (PCI or CABG, respectively) by showing the estimated  
28 percentage of the original population, which at a given time has received the examination (CAG)  
29 and treatment (PCI or CABG). The plot has no distributional assumptions (13). From these plots we  
30  
31  
32  
33  
34  
35  
36  
37  
38  
39  
40  
41  
42  
43  
44  
45  
46  
47  
48  
49  
50  
51  
52  
53  
54  
55  
56  
57  
58  
59  
60

1  
2  
3  
4 derived probability at 1, 3, 7 (only for CABG), 10, 30 and 60 days after diagnosis. These  
5  
6 probabilities are presented in graphs in order to show the development from 2001 to 2009.  
7  
8

9  
10  
11 To test whether the effects seen in the plots were statistically significant, we used the Fine Gray  
12  
13 model, a regression model that accounts for competing risks and adjusts for covariates (13). In this  
14  
15 model we find the effect of the calendar years when controlling for covariates (age, sex, LMCA  
16  
17 involvement and number of occluded vessels).  
18

19  
20  
21 When analysing the impact of the fixed treatment protocols implemented during 2009, a proper  
22  
23 evaluation with a control group was not feasible due to lack of an appropriate comparison group.  
24  
25 Consequently we applied a second-best solution where we looked at whether the change in times to  
26  
27 examination or treatment in the year 2009 differed from the time trend observed in the time period  
28  
29 from 2001 to 2008 extrapolated to 2009. The use of this method was inspired by the methods used  
30  
31 by Lee et al when evaluating the effects of Pay for Performance in the UK (16). We tested this in  
32  
33 the Fine Gray model and report the test statistics as  $z$ . Year 2001 is the reference when year is  
34  
35 included categorically. In all analyses a 5 % significance level was used.  
36  
37  
38

39  
40  
41 Data were analysed with SAS version 9.3, STATA version 12.1 and by using the macro  
42  
43 COMPRISK to draw Aalen-Johansen plot provided open access by the MAYO Institute.  
44  
45  
46

#### 47 48 **Results:**

49  
50 Of the 65,909 patients identified 28.7 % were admitted with NSTEMI, 13,4 % with unstable  
51  
52 angina, 25.5 % with STEMI and 32.4 % with non-specified MI. A total of 8,412 patients were after  
53  
54 the CAG registered with a non ACS diagnosis and subsequently excluded from the further analysis  
55  
56  
57  
58  
59  
60



1  
2  
3  
4 of PCI and CABG (see appendix 3 where the diagnoses that account for 80% of these patients are  
5 listed). After CAG the distribution of diagnosis were as follows 35.0 % of patients were admitted  
6 with NSTEMI, 12.6 % with unstable angina, 33.2 with STEMI and 19.2 with non-specific MI.  
7  
8  
9

10  
11  
12 Table 1 show that from 2001 to 2009 the proportion of patients with NSTEMI receiving a CAG and  
13 PCI increased substantially, while the proportion receiving a CABG decreased. During the same  
14 period the fraction of patients examined with a CAG who received this within 3 days increased  
15 from 18.2 % to 55.7 %. For PCI a similar development was seen with 52.0 % treated within 3 days  
16 in 2009 compared to 27.5 % in 2001. For CABG within 7 days the percentage slightly declined over  
17 the time period with some fluctuations.  
18  
19  
20  
21  
22  
23  
24  
25  
26  
27

28 *Insert table 1*  
29

30 For unstable angina the activity rate increased for CAG, but not for PCI in the period from 2001 to  
31 2009 (table 2) however for both CAG and PCI the rates of patient who received these procedures  
32 within 3 days doubled in this time period. For CABG the treatment rate was more than halved.  
33  
34  
35  
36  
37  
38  
39

40 *Insert table 2*  
41  
42  
43

44 Figure 2a shows the development in the probability of invasive examination using CAG from 2001  
45 to 2009 for NSTEMI accounting for the competing risk of death. The figure shows a significant  
46 increase in the use of CAG in the period from 2001 to 2005 with an increase in probability from  
47 49.8 % for CAG at 60 days in 2001 to 70.4 % in 2005 (tested using the Fine Gray model see results  
48 in appendix 4). From 2005 and onwards only a slight increase in probability of CAG at 60 days was  
49 seem. The figure also shows a steady increase in the probability of CAG within 3 days from 2001 to  
50  
51  
52  
53  
54  
55  
56  
57  
58  
59  
60

1  
2  
3  
4 2007 followed by a leap from 19.5 % in 2007 to 31.9 % in 2008 and a further increase to 38.7 % in  
5  
6 2009. The fixed treatment protocol seemed to have a significant effect on the probability of  
7  
8 receiving a CAG within 3 days ( $z=4.16$   $p<0.001$ ). For PCI (figure 2b) there was only a slight  
9  
10 increase in the probability of treatment with PCI at 60 days from 2001 to 2009. Further the  
11  
12 probability of PCI treatment within 3 days increased markedly from 2007 to 2008 and again from  
13  
14 2008 to 2009. The effect of the implementation of the fixed treatment protocols also revealed a  
15  
16 significant effect for PCI ( $z=7.44$   $p<0.001$ ). For CABG the development in treatment probability  
17  
18 was somewhat different with a significant drop in probability of receiving this type of invasive  
19  
20 treatment over the period 2001 to 2006 with subsequent stagnation (figure 1c). The probability of  
21  
22 CABG within 7 days of CAG decreased significantly over the period and there seemed to be no  
23  
24 effect of the fixed treatment protocols ( $z=0.50$   $p=0.62$ ).  
25  
26  
27  
28  
29

30 *Insert figure 2*  
31  
32  
33  
34

35 Figure 3 shows the similar graphs for patient with unstable angina. In general the development was  
36  
37 very similar to that of patients with NSTEMI, but with the increase in the invasive examination and  
38  
39 treatment rate later in the observation period (from 2004 to 2008). The probability of receiving  
40  
41 CAG within 3 days increased three-fold from 2001 to 2009 with an almost constant increase (figure  
42  
43 2a). We saw no effect of the fixed treatment protocols on timing of CAG ( $z=-0.50$   $p=0.62$ ). The PCI  
44  
45 treatment rate at 60 days was somewhat stable in the time period with a small drop in 2004, while  
46  
47 the probability of treatment within 3 days increased almost constantly from 2001 to 2009. There  
48  
49 was no effect of the fixed treatment protocols ( $z=-0.32$   $p=0.75$ ) (figure 2b). For CABG the  
50  
51 treatment probability at 60 days decreased in the time period as well as the treatment probability at  
52  
53 7 days (figure 2c). There was no significant effect of the fixed treatment protocols. For both  
54  
55  
56  
57  
58  
59  
60

1  
2  
3  
4 NSTEMI and unstable angina there was no significant development in death before treatment over  
5  
6 time i.e. a competing risk (analysis not shown).  
7  
8  
9

10  
11 *Insert figure 3*  
12  
13

14  
15 When including age, sex, number of occluded vessels and LMCA involvement (last two only for  
16  
17 PCI and CABG) we found that for NSTEMI the development in CAG examination probability at 3  
18  
19 days and 60 days was the same as seen in the unadjusted analyses, and the effect of the fixed  
20  
21 treatment protocols remained significant. For PCI the same pattern was observed, however when  
22  
23 adjusting for number of occluded vessels, the linear effect of year became insignificant, but the  
24  
25 effect of the fixed treatment protocols remained. For CABG the picture did not change after the  
26  
27 adjustment except that the decrease in treatment probability seen at 60 days was not as noticeable as  
28  
29 in the unadjusted analysis. Performing the same adjustments did not change the conclusions for  
30  
31 unstable angina either (See all results from the Fine Gray model in appendix 5).  
32  
33  
34  
35  
36  
37  
38  
39  
40  
41  
42  
43  
44  
45  
46  
47  
48  
49  
50  
51  
52  
53  
54  
55  
56  
57  
58  
59  
60

## Discussion

In this nationwide cohort study, we found a significant increase in the proportions of patients with NSTEMI and unstable angina receiving a CAG and PCI in Denmark between 2001 and 2009, while the proportion receiving CABG decreased. In the analysis accounting for competing risks there was an increase in the probability of examination and treatment within 3 days for CAG and PCI after 2001 and there seemed to be a significant effect of the introduction of a fixed treatment protocol with recommended maximum time from diagnosis to invasive examination and treatment for NSTEMI, but not for unstable angina.

Our results are in agreement with studies from the US, which showed an increase in the use of CAG and PCI over the last two decades, and a decrease in CABG (1, 17, 18). The study also contributes to the interpretation of the findings from a recent Danish study (2), which showed a significant reduction in 30-day and 1-year mortality risk after first time hospitalisation for MI between 1999-2003 and 2004-2008. Part of this reduction could be due to a decrease in time to treatment. When comparing with this study one should keep in mind that we did not include patients with STEMI who are included in Schmidt et al.s study and that these patients have a succinct treatment path with the need for more urgent treatment. There seems to be no other nationwide studies on trends in time from diagnosis to invasive treatment; however in 2009 Bradley et al reported a decrease in door to balloon time for patients with STEMI after enrolment in a national quality campaign with the aim to reduce the door to balloon time to less than 90 minutes for this group (19).

We did find a significant decline in time for CAG and PCI corresponding to implementation of the fixed treatment protocol for NSTEMI. However, for both NSTEMI and unstable angina, we found a steady increase in treatment rate from 2001 and onwards and for NSTEMI a steep increase in

1  
2  
3  
4 probability already in 2008. This indicates that focus on improvement on time to invasive  
5  
6 examination and treatment is not new. Furthermore the treatment protocols were first implemented  
7  
8 during 2009, but they were already discussed in 2008 and this could have led to early  
9  
10 implementation and hence an increase in speed of invasive examination and treatment before the  
11  
12 actual implementation. In this time period there seemed to be a general agreement on the benefits of  
13  
14 an invasive strategy vs. medical management for patients with NSTEMI (20, 21). However the  
15  
16 optimal timing of invasive interventions was not clearly agreed upon. Mehta et al published in 2009  
17  
18 their results from the large TIMACS trial which included 3031 patients with unstable angina or  
19  
20 NSTEMI. They found a significantly lower risk of death, myocardial infarction or stroke at 6  
21  
22 months for high risk patients when comparing an early (less than 24 h) with a delayed strategy  
23  
24 (more than 36 h). Furthermore they found no safety issues related to the early strategy (22). This  
25  
26 shows the importance of early invasive treatment however these results only reflect the difference  
27  
28 between very early and early invasive intervention which is a slightly other discussion than ours. In  
29  
30 2010 a metaanalysis was published combining four trials which concluded that early angiography  
31  
32 and if relevant treatment for patients with NSTEMI reduces the risk of recurrent ischemia and  
33  
34 shortens hospital stay (23). These results were however not reflected in the European Society of  
35  
36 Cardiology guidelines until 2011 (4). However the previous guideline from 2007 (p. 27) also  
37  
38 stated: "...Accordingly, currently available evidence does not mandate a systematic approach of  
39  
40 immediate angiography in NSTEMI-ACS patients stabilized with a contemporary pharmacological  
41  
42 approach. Likewise, routine practice of immediate transfer of stabilized patients admitted in  
43  
44 hospitals without onsite catheterization facilities is not mandatory, but should be organized within 72  
45  
46 h" (7). We found that the number of patients receiving the recommended invasive examination and  
47  
48 treatment within the recommend time frame increased from 2001 to 2009, however a large group of  
49  
50 patient still received no invasive investigation or were treated later than the guideline recommends  
51  
52  
53  
54  
55  
56  
57  
58  
59  
60

1  
2  
3  
4 in 2009. This patient group consists of three possible groups: patients that don't have the disease in  
5  
6 question due to lack of validity of data (see later discussion of strengths and weaknesses), patients  
7  
8 who are too ill to be treated and patients who receive a less than optimal treatment. The basic idea  
9  
10 behind the fixed treatment protocol i.e. same treatment for patients presenting with the same clinical  
11  
12 symptoms irrespective of when or where patients come in contact with the health care system  
13  
14 should ensure that the latter group is proportionally smaller in 2009 than in 2001. However, there  
15  
16 could still be patients who don't receive optimal treatment and unexplained variation between  
17  
18 hospitals. Therefor monitoring by health authorities is of great importance.  
19  
20  
21  
22  
23

### 24 **Strengths and weaknesses**

25  
26 The primary strength of this study is the large unselected patient population, as it covers all patients  
27  
28 admitted with first time ACS in the period from 2001 to 2009 in Denmark. The patients were  
29  
30 identified in the NPR, however this means that we do not have information on biomarkers but  
31  
32 solely rely on the correctness on what is registered in the NPR. We excluded outpatients and  
33  
34 patients with a diagnosis from an emergency room which was not verified in a ward subsequently,  
35  
36 however especially the unstable angina diagnosis is still problematic. Thus, it has been found that  
37  
38 the positive predictive value of unstable angina for patients discharged from a ward only seems to  
39  
40 around 40 % (12). Therefor one reason for the lack of effect of the fixed treatment protocols for this  
41  
42 group of patients could be that a substantial part of this group does not have unstable angina. The  
43  
44 data in the NPR allowed us to follow patients through the course of diagnosis and treatment path,  
45  
46 and we utilised this to change patients' diagnoses after the CAG in case another diagnosis was  
47  
48 registered at this point in time. This was done in order to imitate the clinical situation. At CAG  
49  
50 8,412 patients had a diagnosis other than ACS. The largest group was 3,230 patients with angina no  
51  
52 specification. This group of patients could potentially be patients with unstable angina however  
53  
54  
55  
56  
57  
58  
59  
60

1  
2  
3  
4 including this group did not change the conclusions (analysis not shown). We had information on  
5  
6 the specific hour of admission and used this information to calculate time to treatment. Although the  
7  
8 validity of this information can be questioned, we used it in order to calculate the time as precisely  
9  
10 as possible. We only included treatment and examination within 60 days as ACS is an acute disease  
11  
12 for which treatment if relevant should be initiated as soon as possible. We analysed our data by use  
13  
14 of statistical methods that accounted for the competing risk of death, which is very important when  
15  
16 we estimate trends in time to treatment in a population with a high risk of death. However we do not  
17  
18 know whether patients who died were not treated because the risk of invasive examination and  
19  
20 treatment was deemed too high, or because the treatment was not considered relevant. Our analysis  
21  
22 showed that the group of patients not receiving CAG was reduced in the period from 2001 to 2009,  
23  
24 which was primarily due to an increase in examination of elderly patients (analysis not shown). We  
25  
26 also included information on the number of occluded vessels and LMCA involvement as a measure  
27  
28 of the extension and severity of the disease in the analysis. This information was only available for  
29  
30 84.7% and 82.1 % of the patients and especially patients from 2001 and 2002 had missing  
31  
32 information on this variable. However, we have no reason to believe that this missing data should  
33  
34 be non-random and related to time to treatment. Further we did not use age standardised data in the  
35  
36 trend analyses because the fixed treatments protocols include all patient groups. However, we tested  
37  
38 whether there was an effect of the treatment protocols in the Fine Gray model which adjusted for  
39  
40 age, gender, LMCA involvement and number of occluded vessels. The analyses showed that these  
41  
42 variables did not change the effect of the treatment protocols. It should also be noticed that we did  
43  
44 not include patients who died before arrival to a hospital as these patients are not included in the  
45  
46 NPR. It should also be noticed that our study is an observational trend study and we cannot exclude  
47  
48 that other organizational or treatment factors than the introduction of the fixed treatment protocol  
49  
50 has contributed to the observed reduction in time to examination and treatment. This study only  
51  
52  
53  
54  
55  
56  
57  
58  
59  
60

1  
2  
3  
4 evaluates the immediate effects of the fixed treatment protocols; however a longer follow up would  
5  
6 also be of interest.  
7  
8  
9

10  
11 **In conclusion, this study** contributes to the interpretation of the recent decline in mortality after  
12 hospitalisation for MI by showing a contemporary increase in the proportion of patients receiving a  
13 CAG and PCI as well as an increase in the probability of patients receiving CAG and PCI within the  
14 recommended time. The study also suggest that the introduction of fixed treatment protocols with a  
15 recommended maximum time from diagnosis to invasive examination and treatment may have  
16 impacted on time to treatment as more patients receive a CAG and PCI within the time limit of 3  
17 days around the time of the introduction of the protocols.  
18  
19  
20  
21  
22  
23  
24  
25  
26  
27  
28  
29  
30  
31  
32  
33  
34  
35  
36  
37  
38  
39  
40  
41  
42  
43  
44  
45  
46  
47  
48  
49  
50  
51  
52  
53  
54  
55  
56  
57  
58  
59  
60



**Table 1: Coronary angiography (CAG), Percutaneous coronary intervention (PCI) and Coronary artery bypass grafting (CABG) treatment rates and number treated within 3/7 days distributed according to covariates for patients with first time Non ST elevation myocardial infarction (NSTEMI)**

| NSTEMI                     |               | Diagnosis at initial examination |        |              | Diagnosis registered after CAG                                |      |              |                              |      |              |
|----------------------------|---------------|----------------------------------|--------|--------------|---------------------------------------------------------------|------|--------------|------------------------------|------|--------------|
|                            |               | CAG within 60 days               |        |              | PCI within 60 days (Grouped according to after CAG diagnosis) |      |              | CABG within 60 days from CAG |      |              |
|                            |               | Examination rate %               | n      | % in 3 days* | Treatment rate %                                              | N    | % in 3 days* | Treatment rate %             | n    | % in 7 days* |
| Overall                    | 18,947        | 63.3                             | 11,997 | 31.8         | 52.7                                                          | 5984 | 30.7         | 16.2                         | 1836 | 26.3         |
| Year of diagnosis          | 2001          | 49.8                             | 823    | 18.2         | 48.4                                                          | 255  | 27.5         | 23.0                         | 121  | 29.5         |
|                            | 2002          | 54.9                             | 1,177  | 19.9         | 49.6                                                          | 465  | 24.8         | 22.8                         | 214  | 23.7         |
|                            | 2003          | 58.7                             | 1,355  | 26.2         | 51.4                                                          | 597  | 21.2         | 19.5                         | 226  | 38.5         |
|                            | 2004          | 61.3                             | 1,422  | 23.2         | 54.3                                                          | 673  | 24.2         | 17.8                         | 221  | 35.5         |
|                            | 2005          | 67.7                             | 1,480  | 26.6         | 56.7                                                          | 771  | 23.7         | 16.2                         | 220  | 25.7         |
|                            | 2006          | 68.0                             | 1,401  | 28.9         | 55.1                                                          | 792  | 24.6         | 13.1                         | 188  | 23.3         |
|                            | 2007          | 66.9                             | 1,438  | 30.7         | 49.5                                                          | 728  | 27.4         | 16.5                         | 243  | 15.3         |
|                            | 2008          | 70.5                             | 1,533  | 46.2         | 50.3                                                          | 817  | 38.9         | 13.2                         | 214  | 24.7         |
|                            | 2009          | 70.0                             | 1,368  | 55.7         | 55.3                                                          | 886  | 52.0         | 11.8                         | 189  | 23.0         |
| Gender                     | Men           | 70.8                             | 8,072  | 32.3         | 56.3                                                          | 4247 | 30.8         | 18.8                         | 1424 | 25.7         |
|                            | Women         | 52.1                             | 3,791  | 29.4         | 47.0                                                          | 1615 | 26.9         | 11.2                         | 386  | 28.0         |
| Age                        | 30 or younger | 86.7                             | 26     | 37.5         | 15.0                                                          | 3    | 66.7         | -                            | -    | -            |
|                            | 30-39         | 91.5                             | 225    | 44.3         | 53.1                                                          | 111  | 42.9         | 2.3                          | 5    | 60.0         |
|                            | 40-49         | 91.4                             | 1,093  | 40.6         | 59.2                                                          | 599  | 42.2         | 7.0                          | 72   | 33.8         |
|                            | 50-59         | 89.4                             | 2,521  | 33.2         | 61.0                                                          | 1459 | 29.8         | 12.5                         | 302  | 28.3         |
|                            | 60-69         | 84.0                             | 3,543  | 29.8         | 52.5                                                          | 1703 | 28.3         | 20.8                         | 675  | 25.6         |
|                            | 70-79         | 66.1                             | 3,337  | 27.6         | 47.9                                                          | 1472 | 25.9         | 21.7                         | 665  | 23.7         |
|                            | 80 or older   | 21.8                             | 1,118  | 31.2         | 49.7                                                          | 515  | 27.5         | 8.7                          | 91   | 33.3         |
| LMCA** involvement         | Yes           |                                  |        |              | 18.7                                                          | 39   | 33.3         | 65.6                         | 137  | 50.4         |
|                            | No            |                                  |        |              | 54.6                                                          | 4885 | 32.1         | 14.3                         | 1276 | 24.9         |
| Number of occluded vessels | 0             |                                  |        |              | 1.9                                                           | 22   | 31.8         | 0.3                          | 4    | 50.0         |
|                            | 1 vessel      |                                  |        |              | 78.5                                                          | 2592 | 36.2         | 1.5                          | 49   | 36.7         |
|                            | 2 vessels     |                                  |        |              | 71.7                                                          | 1393 | 32.0         | 12.7                         | 246  | 23.4         |
|                            | 3 vessels     |                                  |        |              | 30.0                                                          | 630  | 30.1         | 49.3                         | 1034 | 29.6         |

\* National guidelines recommend CAG and PCI within 3 days of diagnosis and CABG within 7 days of CAG.

\*\* Left Main Coronary Artery

**Table 2: Coronary angiography (CAG), Percutaneous coronary intervention (PCI) and Coronary artery bypass grafting (CABG) treatment rates and number treated within 3/7 days distributed according to covariates for patients with first time Unstable Angina**

| Unstable angina                   |                      | Diagnosis at initial examination |       |              | Diagnosis registered after CAG                                |      |              |                              |      |              |
|-----------------------------------|----------------------|----------------------------------|-------|--------------|---------------------------------------------------------------|------|--------------|------------------------------|------|--------------|
|                                   |                      | CAG within 60 days               |       |              | PCI within 60 days (Grouped according to after CAG diagnosis) |      |              | CABG within 60 days from CAG |      |              |
|                                   |                      | Examination rate %               | n     | % in 3 days* | Treatment rate %                                              | n    | % in 3 days* | Treatment rate %             | n    | % in 7 days* |
| <b>Overall</b>                    | <b>8,820</b>         | 71.4                             | 6,300 | 44.2         | 49.7                                                          | 2031 | 38.9         | 18.0                         | 735  | 43.7         |
| <b>Year of diagnosis</b>          | <b>2001</b>          | 59.9                             | 631   | 30.2         | 51.3                                                          | 224  | 24.9         | 26.8                         | 117  | 47.2         |
|                                   | <b>2002</b>          | 61.0                             | 649   | 32.0         | 47.6                                                          | 200  | 31.2         | 28.8                         | 121  | 44.5         |
|                                   | <b>2003</b>          | 64.5                             | 633   | 37.1         | 49.5                                                          | 206  | 33.5         | 22.8                         | 95   | 55.3         |
|                                   | <b>2004</b>          | 72.3                             | 663   | 33.1         | 43.4                                                          | 170  | 23.3         | 20.4                         | 80   | 53.4         |
|                                   | <b>2005</b>          | 74.1                             | 705   | 43.1         | 51.2                                                          | 229  | 38.1         | 14.5                         | 65   | 36.7         |
|                                   | <b>2006</b>          | 74.3                             | 753   | 44.6         | 52.3                                                          | 228  | 39.9         | 14.0                         | 61   | 42.1         |
|                                   | <b>2007</b>          | 78.3                             | 720   | 51.9         | 49.2                                                          | 214  | 43.0         | 15.9                         | 69   | 30.0         |
|                                   | <b>2008</b>          | 82.1                             | 823   | 55.5         | 50.4                                                          | 317  | 52.6         | 11.6                         | 73   | 42.0         |
| <b>2009</b>                       | 79.0                 | 723                              | 62.0  | 50.9         | 243                                                           | 51.1 | 11.3         | 54                           | 29.2 |              |
| <b>Gender</b>                     | <b>Men</b>           | 74.9                             | 3,719 | 44.6         | 51.6                                                          | 1318 | 39.5         | 21.4                         | 549  | 44.1         |
|                                   | <b>Women</b>         | 66.7                             | 2,305 | 37.7         | 48.2                                                          | 658  | 33.4         | 12.0                         | 166  | 41.7         |
| <b>Age</b>                        | <b>30 or younger</b> | 64.3                             | 18    | 61.1         | -                                                             | -    | -            | 14.3                         | 1    | 0            |
|                                   | <b>30-39</b>         | 71.4                             | 177   | 43.0         | 39.1                                                          | 34   | 52.9         | 4.5                          | 4    | 25.0         |
|                                   | <b>40-49</b>         | 75.6                             | 684   | 43.7         | 49.5                                                          | 207  | 45.8         | 7.3                          | 31   | 50.0         |
|                                   | <b>50-59</b>         | 80.4                             | 1,562 | 40.0         | 54.0                                                          | 534  | 39.9         | 13.8                         | 137  | 37.0         |
|                                   | <b>60-69</b>         | 78.3                             | 1,841 | 42.7         | 50.3                                                          | 609  | 36.1         | 21.8                         | 265  | 46.7         |
|                                   | <b>70-79</b>         | 70.7                             | 1,350 | 40.8         | 46.9                                                          | 429  | 32.3         | 26.7                         | 244  | 42.7         |
| <b>80 or older</b>                | 37.8                 | 392                              | 45.8  | 55.3         | 163                                                           | 34.7 | 11.0         | 33                           | 50.0 |              |
| <b>LMCA* involvement</b>          | <b>yes</b>           |                                  |       |              | 14.8                                                          | 21   | 47.6         | 75.4                         | 107  | 60.0         |
|                                   | <b>No</b>            |                                  |       |              | 52.6                                                          | 1684 | 39.7         | 15.5                         | 496  | 39.8         |
| <b>Number of occluded vessels</b> | <b>0</b>             |                                  |       |              | 1.9                                                           | 11   | 50.0         | 0.5                          | 3    | 0            |
|                                   | <b>1 vessel</b>      |                                  |       |              | 79.1                                                          | 1010 | 44.1         | 2.3                          | 30   | 40.0         |
|                                   | <b>2 vessels</b>     |                                  |       |              | 67.1                                                          | 451  | 36.7         | 19.6                         | 132  | 42.3         |
|                                   | <b>3 vessels</b>     |                                  |       |              | 26.5                                                          | 186  | 31.8         | 58.3                         | 409  | 43.8         |

\* National guidelines recommend CAG and PCI within 3 days of diagnosis and CABG within 7 days of CAG.

\*\* Left Main Coronary Artery

1  
2  
3  
4  
5  
6 **Contributors:** SM, DGH, EP, ADOZ, MO contributed to the design of the study. SM carried out  
7  
8 statistical analysis with guidance from PKA and MO. SM wrote initial draft and all authors  
9  
10 critically revised the manuscript.  
11  
12

### 13 14 15 **Funding**

16  
17 This work was supported by the Danish Heart Association [grant number 10-04-R78-A2806-  
18  
19 22609], The Health Insurance Foundation [grant number 2011B037], Fabrikant Ejner Willumsens  
20  
21 Mindelegat og Aase og Ejner Danielsens Foundation.  
22  
23

24  
25  
26 **Competing interest:** None  
27  
28

### 29 30 31 **Ethics**

32  
33 This register based study was approved the Danish Data Protection Agency (Approval number  
34  
35 2010-41-5263). Register based studies does not need approval by a medical ethics committee in  
36  
37 Denmark.  
38  
39

40  
41 **Data sharing:** There are no available data  
42  
43  
44  
45  
46  
47  
48  
49  
50  
51  
52  
53  
54  
55  
56  
57  
58  
59  
60

## Reference List

1. Fox KA, Steg PG, Eagle KA, et al. Decline in rates of death and heart failure in acute coronary syndromes, 1999-2006. *JAMA* 2007;**297**(17):1892-1900.
2. Schmidt M, Jacobsen JB, Lash TL, et al. 25 year trends in first time hospitalisation for acute myocardial infarction, subsequent short and long term mortality, and the prognostic impact of sex and comorbidity: a Danish nationwide cohort study. *BMJ* 2012;**344**:e356.
3. Ford ES, Ajani UA, Croft JB, et al. Explaining the decrease in U.S. deaths from coronary disease, 1980-2000. *N Engl J Med* 2007;**356**(23):2388-2398.
4. Hamm CW, Bassand JP, Agewall S, et al. ESC Guidelines for the management of acute coronary syndromes in patients presenting without persistent ST-segment elevation: The Task Force for the management of acute coronary syndromes (ACS) in patients presenting without persistent ST-segment elevation of the European Society of Cardiology (ESC). *Eur Heart J* 2011;**32**(23):2999-3054.
5. Pedersen KM, Christiansen T, Bech M. The Danish health care system: evolution--not revolution--in a decentralized system. *Health Econ* 2005;**14**(Suppl 1):S41-S57.
6. Danish National Board of Health. Treatment protocols for unstable angina and acute myocardial infarction without ST-segment elevation  
<http://www.sst.dk/Udgivelser/2009/Pakkeforloeb%20for%20ustabil%20angina%20pectoris%20UAP%20og%20akut%20myokardieinfakt%20uden%20st-elevation%20NSTEMI.aspx>. 2009.
7. Bassand JP, Hamm CW, Ardissino D, et al. Guidelines for the diagnosis and treatment of non-ST-segment elevation acute coronary syndromes. *Eur Heart J* 2007;**28**(13):1598-1660.
8. Lynge E, Sandegaard JL, Rebolj M. The Danish National Patient Register. *Scand J Public Health* 2011;**39**(7 Suppl):30-33.
9. Green A. Danish clinical databases: an overview. *Scand J Public Health* 2011;**39**(7 Suppl):68-71.
10. Abildstrom SZ, Madsen M. The Danish Heart Register. *Scand J Public Health* 2011;**39**(7 Suppl):46-49.
11. Helweg-Larsen K. The Danish Register of Causes of Death. *Scand J Public Health* 2011;**39**(7 Suppl):26-29.
12. Joensen AM, Jensen MK, Overvad K, et al. Predictive values of acute coronary syndrome discharge diagnoses differed in the Danish National Patient Registry. *J Clin Epidemiol* 2009;**62**(2):188-194.
13. Andersen PK, Geskus RB, de WT, et al. Competing risks in epidemiology: possibilities and pitfalls. *Int J Epidemiol* 2012.

14. Jensen LO, Thayssen P. [Treatment and prognosis after acute coronary syndrome in an unselected patient population]. *Ugeskr Laeger* 2007;**169**(6):492-497.
15. Nikus KC, Eskola MJ, Virtanen VK, et al. Mortality of patients with acute coronary syndromes still remains high: a follow-up study of 1188 consecutive patients admitted to a university hospital. *Ann Med* 2007;**39**(1):63-71.
16. Lee JT, Netuveli G, Majeed A, et al. The effects of pay for performance on disparities in stroke, hypertension, and coronary heart disease management: interrupted time series study. *PLoS One* 2011;**6**(12):e27236.
17. McManus DD, Gore J, Yarzebski J, et al. Recent trends in the incidence, treatment, and outcomes of patients with STEMI and NSTEMI. *Am J Med* 2011;**124**(1):40-47.
18. Peterson ED, Shah BR, Parsons L, et al. Trends in quality of care for patients with acute myocardial infarction in the National Registry of Myocardial Infarction from 1990 to 2006. *Am Heart J* 2008;**156**(6):1045-1055.
19. Bradley EH, Nallamothu BK, Herrin J, et al. National efforts to improve door-to-balloon time results from the Door-to-Balloon Alliance. *J Am Coll Cardiol* 2009;**54**(25):2423-2429.
20. Bavry AA, Kumbhani DJ, Rassi AN, et al. Benefit of early invasive therapy in acute coronary syndromes: a meta-analysis of contemporary randomized clinical trials. *J Am Coll Cardiol* 2006;**48**(7):1319-1325.
21. Fox KA, Poole-Wilson PA, Henderson RA, et al. Interventional versus conservative treatment for patients with unstable angina or non-ST-elevation myocardial infarction: the British Heart Foundation RITA 3 randomised trial. Randomized Intervention Trial of unstable Angina. *Lancet* 2002;**360**(9335):743-751.
22. Mehta SR, Granger CB, Boden WE, et al. Early versus delayed invasive intervention in acute coronary syndromes. *N Engl J Med* 2009;**360**(21):2165-2175.
23. Katritsis DG, Siontis GC, Kastrati A, et al. Optimal timing of coronary angiography and potential intervention in non-ST-elevation acute coronary syndromes. *Eur Heart J* 2011;**32**(1):32-40.

**Title**

**Trends in ~~invasive examination, treatment rate and time to~~ invasive examination and treatment from 2001 to 2009 in patients admitted first time with non ST-elevation Myocardial Infarction or unstable angina in Denmark.**

**Solvej Mårtensson MSc Public Health <sup>1\*</sup>, prof. Dorte Gyrd-Hansen <sup>2</sup>, prof. Eva Prescott MD, DMSc <sup>3</sup>, prof. Per Kragh Andersen<sup>4</sup>, Ann-Dorthe Olsen Zwisler MD PhD<sup>5</sup>, prof. Merete Osler MD, DMSc <sup>1,6</sup>**

1. Research Centre for Prevention and Health, Capital Region of Denmark, Glostrup, Denmark
2. COHERE, University of Southern Denmark, Odense, Denmark
3. Department of Cardiology, Bispebjerg University Hospital, Copenhagen, Denmark
4. Department of Biostatistics, Institute of Public Health, University of Copenhagen, Copenhagen, Denmark
5. Danish Heart Registry, National Institute of Public Health, University of Southern Denmark
6. Institute of Public Health, University of Copenhagen, Copenhagen, Denmark

**\*Corresponding author: [solvej.maartensson@regionh.dk](mailto:solvej.maartensson@regionh.dk), telephone number: +45 38632198**

**Number of words in main text: 3,873**

1  
2  
3  
4 Abstract

5  
6  
7  
8 Objective:

9  
10 To investigate ~~time~~ trends in ~~invasive examination and~~ time to invasive examination and treatment  
11 for patient with first time diagnosis of non-ST-elevation Myocardial infarction (NSTEMI) and  
12 unstable angina in the period from 2001 to 2009 in Denmark  
13  
14

15  
16  
17  
18  
19 Design: From 1 January 2001 to 31 December 2009 all first time hospitalisations with NSTEMI and  
20 unstable angina were identified in the National Patient Registry (n=65,909). Time from admission  
21 to initiation of coronary angiography (CAG), percutaneous coronary intervention (PCI) or coronary  
22 artery bypass graft (CABG) was calculated. We described the development in invasive examination  
23 and treatment probability (CAG, PCI and CABG at 3, 7, 10, 30 and 60 days) for the years 2001 to  
24 2009, taking the competing risk of death into account using Aalen-Johansen estimators and a Fine  
25  
26  
27  
28  
29  
30  
31  
32  
33  
34  
35  
36  
37  
38  
39  
40  
41  
42  
43  
44  
45  
46  
47  
48  
49  
50  
51  
52  
53  
54  
55  
56  
57  
58  
59  
60  
61  
62  
63  
64  
65  
66  
67  
68  
69  
70  
71  
72  
73  
74  
75  
76  
77  
78  
79  
80  
81  
82  
83  
84  
85  
86  
87  
88  
89  
90  
91  
92  
93  
94  
95  
96  
97  
98  
99  
100  
101  
102  
103  
104  
105  
106  
107  
108  
109  
110  
111  
112  
113  
114  
115  
116  
117  
118  
119  
120  
121  
122  
123  
124  
125  
126  
127  
128  
129  
130  
131  
132  
133  
134  
135  
136  
137  
138  
139  
140  
141  
142  
143  
144  
145  
146  
147  
148  
149  
150  
151  
152  
153  
154  
155  
156  
157  
158  
159  
160  
161  
162  
163  
164  
165  
166  
167  
168  
169  
170  
171  
172  
173  
174  
175  
176  
177  
178  
179  
180  
181  
182  
183  
184  
185  
186  
187  
188  
189  
190  
191  
192  
193  
194  
195  
196  
197  
198  
199  
200  
201  
202  
203  
204  
205  
206  
207  
208  
209  
210  
211  
212  
213  
214  
215  
216  
217  
218  
219  
220  
221  
222  
223  
224  
225  
226  
227  
228  
229  
230  
231  
232  
233  
234  
235  
236  
237  
238  
239  
240  
241  
242  
243  
244  
245  
246  
247  
248  
249  
250  
251  
252  
253  
254  
255  
256  
257  
258  
259  
260  
261  
262  
263  
264  
265  
266  
267  
268  
269  
270  
271  
272  
273  
274  
275  
276  
277  
278  
279  
280  
281  
282  
283  
284  
285  
286  
287  
288  
289  
290  
291  
292  
293  
294  
295  
296  
297  
298  
299  
300  
301  
302  
303  
304  
305  
306  
307  
308  
309  
310  
311  
312  
313  
314  
315  
316  
317  
318  
319  
320  
321  
322  
323  
324  
325  
326  
327  
328  
329  
330  
331  
332  
333  
334  
335  
336  
337  
338  
339  
340  
341  
342  
343  
344  
345  
346  
347  
348  
349  
350  
351  
352  
353  
354  
355  
356  
357  
358  
359  
360  
361  
362  
363  
364  
365  
366  
367  
368  
369  
370  
371  
372  
373  
374  
375  
376  
377  
378  
379  
380  
381  
382  
383  
384  
385  
386  
387  
388  
389  
390  
391  
392  
393  
394  
395  
396  
397  
398  
399  
400  
401  
402  
403  
404  
405  
406  
407  
408  
409  
410  
411  
412  
413  
414  
415  
416  
417  
418  
419  
420  
421  
422  
423  
424  
425  
426  
427  
428  
429  
430  
431  
432  
433  
434  
435  
436  
437  
438  
439  
440  
441  
442  
443  
444  
445  
446  
447  
448  
449  
450  
451  
452  
453  
454  
455  
456  
457  
458  
459  
460  
461  
462  
463  
464  
465  
466  
467  
468  
469  
470  
471  
472  
473  
474  
475  
476  
477  
478  
479  
480  
481  
482  
483  
484  
485  
486  
487  
488  
489  
490  
491  
492  
493  
494  
495  
496  
497  
498  
499  
500  
501  
502  
503  
504  
505  
506  
507  
508  
509  
510  
511  
512  
513  
514  
515  
516  
517  
518  
519  
520  
521  
522  
523  
524  
525  
526  
527  
528  
529  
530  
531  
532  
533  
534  
535  
536  
537  
538  
539  
540  
541  
542  
543  
544  
545  
546  
547  
548  
549  
550  
551  
552  
553  
554  
555  
556  
557  
558  
559  
560  
561  
562  
563  
564  
565  
566  
567  
568  
569  
570  
571  
572  
573  
574  
575  
576  
577  
578  
579  
580  
581  
582  
583  
584  
585  
586  
587  
588  
589  
590  
591  
592  
593  
594  
595  
596  
597  
598  
599  
600  
601  
602  
603  
604  
605  
606  
607  
608  
609  
610  
611  
612  
613  
614  
615  
616  
617  
618  
619  
620  
621  
622  
623  
624  
625  
626  
627  
628  
629  
630  
631  
632  
633  
634  
635  
636  
637  
638  
639  
640  
641  
642  
643  
644  
645  
646  
647  
648  
649  
650  
651  
652  
653  
654  
655  
656  
657  
658  
659  
660  
661  
662  
663  
664  
665  
666  
667  
668  
669  
670  
671  
672  
673  
674  
675  
676  
677  
678  
679  
680  
681  
682  
683  
684  
685  
686  
687  
688  
689  
690  
691  
692  
693  
694  
695  
696  
697  
698  
699  
700  
701  
702  
703  
704  
705  
706  
707  
708  
709  
710  
711  
712  
713  
714  
715  
716  
717  
718  
719  
720  
721  
722  
723  
724  
725  
726  
727  
728  
729  
730  
731  
732  
733  
734  
735  
736  
737  
738  
739  
740  
741  
742  
743  
744  
745  
746  
747  
748  
749  
750  
751  
752  
753  
754  
755  
756  
757  
758  
759  
760  
761  
762  
763  
764  
765  
766  
767  
768  
769  
770  
771  
772  
773  
774  
775  
776  
777  
778  
779  
780  
781  
782  
783  
784  
785  
786  
787  
788  
789  
790  
791  
792  
793  
794  
795  
796  
797  
798  
799  
800  
801  
802  
803  
804  
805  
806  
807  
808  
809  
810  
811  
812  
813  
814  
815  
816  
817  
818  
819  
820  
821  
822  
823  
824  
825  
826  
827  
828  
829  
830  
831  
832  
833  
834  
835  
836  
837  
838  
839  
840  
841  
842  
843  
844  
845  
846  
847  
848  
849  
850  
851  
852  
853  
854  
855  
856  
857  
858  
859  
860  
861  
862  
863  
864  
865  
866  
867  
868  
869  
870  
871  
872  
873  
874  
875  
876  
877  
878  
879  
880  
881  
882  
883  
884  
885  
886  
887  
888  
889  
890  
891  
892  
893  
894  
895  
896  
897  
898  
899  
900  
901  
902  
903  
904  
905  
906  
907  
908  
909  
910  
911  
912  
913  
914  
915  
916  
917  
918  
919  
920  
921  
922  
923  
924  
925  
926  
927  
928  
929  
930  
931  
932  
933  
934  
935  
936  
937  
938  
939  
940  
941  
942  
943  
944  
945  
946  
947  
948  
949  
950  
951  
952  
953  
954  
955  
956  
957  
958  
959  
960  
961  
962  
963  
964  
965  
966  
967  
968  
969  
970  
971  
972  
973  
974  
975  
976  
977  
978  
979  
980  
981  
982  
983  
984  
985  
986  
987  
988  
989  
990  
991  
992  
993  
994  
995  
996  
997  
998  
999  
1000

Setting: Nationwide Danish cohort

Results: The proportion of patients ~~with~~ receiving a CAG and PCI increased substantially over time while the proportion receiving a CABG decreased for both NSTEMI and unstable angina. For both NSTEMI and unstable angina a significant increase in invasive examination and treatment probability at 3 days for CAG and PCI was seen especially from 2007 through to 2009. For NSTEMI the CAG ~~treatment-examination~~ probability at 3 days leaped from 20.4% in 2007 to 32.4% in 2008 and 39 % in 2009 and PCI the same was true with a leap in treatment probability from 19 % to 28 % from 2008 to 2009.

1  
2  
3  
4  
5  
6  
7  
8  
9 Conclusions: In Denmark the use of CAG and PCI in treatment of NSTEMI and unstable angina  
10 has increased from 2001 to 2009 while the use of CABG has decreased. During the same period  
11 there was a marked increase in invasive examination and treatment probability at 3 days i.e. more  
12 patients were treated faster which is in line with the political aim of reducing time to treatment.  
13  
14  
15  
16  
17  
18  
19

20 Main strengths:

- 21 • Large unselected patient population n=65,909
- 22 • Detailed register based data
- 23 • Use of statistical methods that account for competing risks
- 24 • Information on extension and severity of the disease

25  
26  
27  
28  
29  
30  
31 Main limitations:

- 32 • No information on biomarkers to validate register based data
- 33 • No information on why patients died before treatment

34  
35  
36  
37  
38  
39  
40  
41  
42 Keywords: acute coronary heart syndrome, NSTEMI, Unstable angina, time to treatment, time  
43 trends, cohort design  
44  
45  
46  
47  
48  
49  
50  
51  
52  
53  
54  
55  
56  
57  
58  
59  
60



## Introduction

Treatment of acute coronary heart disease has advanced substantially during the latest decades, and improved clinical outcome has been seen (1). A recent register based Danish cohort study by Schmidt et al. found that short term mortality after first time hospitalisation with AMI was nearly halved from 1984 to 2008 (2). It has been suggested that part of this decline can be attributed to improved treatment including introduction of thrombolysis, coronary artery bypass grafting (CABG), percutaneous coronary intervention (PCI) and improved medical prevention after diagnosis (3). Coronary angiography (CAG) is recommended as part of the diagnostic process for all patients with acute myocardial infarction with PCI as the primary intervention (4). Since the mid nineties there has been a strong political focus on time to treatment in order to reduce case fatality (5). For coronary heart disease this focus in Denmark has among other initiatives led to the development of fixed treatment protocols for patients with non ST elevation myocardial infarction (NSTEMI) and unstable angina. These protocols were implemented during 2009. The protocol stipulates that the maximum time from admission with NSTEMI to invasive examination (CAG) should be less than 3 calendar days (72 hours) and time to appropriate invasive treatment less than 3 calendar days for PCI, and 7 calendar days for CABG (6). These protocols are based on the shared European guidelines (4, 7).

The purpose of this study is to ~~explore the~~ investigate a potential explanation ~~causes~~ of the significant improvement in prognosis by ~~investigating describing time trends in invasive examination, treatment and~~ time to invasive examination and treatment for patients with first time diagnosis of NSTEMI or unstable angina in the period from 2001 to 2009 in Denmark using a nationwide cohort design and taking into account vessel disease severity as well as using appropriate methods of analysis that account for the competing risk of death. This study is the first

1  
2  
3  
4  
5  
6  
7  
8  
9  
10  
11  
12  
13  
14  
15  
16  
17  
18  
19  
20  
21  
22  
23  
24  
25  
26  
27  
28  
29  
30  
31  
32  
33  
34  
35  
36  
37  
38  
39  
40  
41  
42  
43  
44  
45  
46  
47  
48  
49  
50  
51  
52  
53  
54  
55  
56  
57  
58  
59  
60

nationwide cohort study to describe time waited for CAG, PCI and CABG over a decade where large changes in treatment of NSTEMI and unstable angina were introduced including the introduction of fixed treatment protocols.

For peer review only

## Method

The Danish health care system provides universal coverage for all citizens. Since 1995, all contacts with the health care system including emergency, ambulatory and inpatient have been registered in the National Patient Registry (NPR) with information about time and date of admission and discharge along with information about diagnosis as well as type and date of potential invasive treatment or examination(8). Furthermore there are several registers and clinical quality databases with patient specific information (9) that can be linked with the data from the NPR through the use of the unique ten-digit person identifier. The registers used for this study are the NPR, ~~the National Prescription Registry, which collects information on redeemed prescriptions (10)~~, the Danish Heart Registry, which registers information regarding patients undergoing invasive cardiac procedure (10) and the Medical Cause of Death Registry, which contains information on time and cause of death (11).

### Study population:

From January 1 2001 to December 31 2009 all first time hospitalisations of acute coronary heart syndrome (ACS) were identified in the National Patient Registry (n= 99,473) by the following ICD10 codes (I20.0 Unstable angina pectoris, I21.0-I21.3 ST-elevation myocardial infarction (STEMI), I21.4 non ST-elevation myocardial infarction (NSTEMI) and I21.9 AMI – Unspecified) using discharge diagnoses (see figure 1). Patients with prior heart disease (ICD10: I20-I25) were excluded using information from the NPR going back to 1995 (n= 19,440) leaving 80,033 patients. A previous study by Joensen et al. found that the ACS diagnosis registered in the NPR should be used with caution especially the unstable angina diagnosis (12). Joensen et al. recommend restricting the analysis to patients discharged from wards when other validation is not possible. We therefor excluded outpatients (n=2,564) and patients with a NSTEMI or unstable angina diagnosis

1  
2  
3  
4 from an emergency room that was not verified in the subsequent admission (n=11,560) still  
5  
6 allowing for a shift from NSTEMI to unstable angina or vice versa. Consequently, the final  
7  
8 population consisted of 65,909 patients. for analysis. ~~Diagnosis~~ diagnosis can change after the result of  
9  
10 CAG therefore we used the diagnosis registered after the CAG in the analysis of time to PCI and  
11  
12 CABG. For this reason the number of patients in the different sub-diagnosis groups vary between  
13  
14 analyses of CAG, PCI and CABG (see figure 1 for distribution of patients with acute coronary heart  
15  
16 syndrome within sub diagnosis groups at initial examination and after coronary angiography).  
17  
18 Patients with STEMI and unspecified MI are only included in the initial descriptive analysis of the  
19  
20 patient population.  
21  
22  
23  
24  
25

## 26 Variables

### 31 Time to examination or treatment (from admission to CAG, PCI and CABG)

32 Time (measured in hours) from admission ~~to a hospital~~ to initiation of coronary angiography  
33  
34 (CAG), percutaneous coronary intervention (PCI) or coronary artery bypass graft (CABG) was  
35  
36 calculated using information from the NPR (the specific SKS codes can be seen in appendix 1)  
37  
38 Only treatment and examination within the first 60 days after initial symptom presentation was  
39  
40 included. Further information regarding this variable can be found in appendix 2.  
41  
42  
43  
44  
45

### 46 Severity and extent of disease

47  
48 Severity and the extent of disease will influence the perceived urgency of treatment. Information on  
49  
50 number of occluded vessels and Left Main Coronary Artery (LMCA) involvement was available  
51  
52 from the Danish Heart Register (DHR) in 82.12% and 845.76 % of the cases that received a CAG,  
53  
54  
55  
56  
57  
58  
59  
60

1  
2  
3  
4 respectively. We allowed for a slip of  $\pm 2$  days between NPR CAG date and DHR CAG date when  
5 identifying CAG information.  
6  
7  
8

9  
10 Other covariates include sex, age and year of diagnosis  
11  
12  
13

### 14 **Statistical methods**

15  
16  
17 In the descriptive analysis the number of patients receiving CAG, PCI or CABG was reported along  
18 with the number of patients receiving the respective examination or treatment within 3 days for  
19 CAG and PCI and 7 days from CAG for CABG for each diagnosis and for each of the covariates:  
20 age, sex, number of occluded vessels and LMCA involvement. When investigating time to  
21 treatment for a specific disease, it is important to account for the competing risk of death in order to  
22 account for the time waited by patients who die before they are treated (13)(12). Reporting a  
23 median time to treatment is not relevant as it will only describe the -time waited by patients who  
24 manage to be treated. Furthermore, if we wish to model cumulated probability of treatment (not  
25 intensities) and applied standard methods (e.g. Cox regression method or Kaplan Meier plots), then  
26 we would regard death without treatment as independent censoring and would only be able to make  
27 inference for a hypothetical population where patients do not die without being treated (13)(12).  
28 ~~This would not represent a true picture of reality.~~ The problem of competing risks is especially  
29 important for a potentially fatal disease like ACS where some sub diagnosis have a relative high  
30 mortality rate (14, 15)(13, 14). Furthermore, as first line invasive treatments are mutually exclusive  
31 (patients receive either PCI or CABG) we need to account for the competing risk of receiving the  
32 other treatment, respectively. To account for this competing risks problem we used Aalen-Johansen  
33 plots where we described the development in invasive examination (CAG) and treatment  
34 probability (CAG, PCI and CABG) for the years 2001 to 2009. These plots account for the  
35  
36  
37  
38  
39  
40  
41  
42  
43  
44  
45  
46  
47  
48  
49  
50  
51  
52  
53  
54  
55  
56  
57  
58  
59  
60

1  
2  
3  
4 competing risks of death and treatment (PCI or CABG, respectively) by showing the estimated  
5  
6 percentage of the original population, which at a given time has received the examination (CAG)  
7  
8 and treatment (~~CAG~~, PCI or CABG). The plot has no distributional assumptions (13)(12). From  
9  
10 these plots we derived ~~treatment~~ probability at 1, 3, 7 (only for CABG), 10, 30 and 60 days after  
11  
12 diagnosis. These probabilities are presented in graphs in order to show the development from 2001  
13  
14 to 2009.  
15  
16  
17  
18  
19

20 To test whether the effects seen in the plots were statistically significant, we used the Fine Gray  
21  
22 model, a regression model that accounts for competing risks and adjusts for covariates (13)(12). In  
23  
24 this model we find the effect of the calendar years when controlling for covariates (age, sex, LMCA  
25  
26 involvement and number of occluded vessels).  
27  
28  
29

30 When analysing the impact of the fixed treatment protocols implemented during 2009, a proper  
31  
32 evaluation with a control group was not feasible due to lack of an appropriate comparison group.  
33  
34

35 Consequently we applied a second-best solution where we looked at whether the change in times to  
36  
37 examination or treatment in the year 2009 differed from the time trend observed in the time period  
38  
39 from 2001 to 2008 extrapolated to 2009. The use of this method was inspired by the methods used  
40  
41 by Lee et al when evaluating the effects of Pay for Performance in the UK (16)(15). We tested this  
42  
43 in the Fine Gray model and report the test statistics as z. Year 2001 is the reference when year is  
44  
45 included categorically. In all analyses a 5 % significance level was used.  
46  
47  
48  
49

50 Data were analysed with SAS version 9.3, STATA version 12.1 and by using the macro  
51  
52 COMPRISK to draw Aalen-Johansen plot provided open access by the MAYO Institute.  
53  
54  
55  
56  
57  
58  
59  
60

**Results:**

Of the ~~65,90980,033~~ patients ~~who were registered with first time ACS and no prior heart disease identified~~ 28.73.4 % were admitted with NSTEMI, 13.49.3 % with unstable angina, ~~25.53.3~~ % with STEMI and ~~32.44.0~~ % with non-specified MI. A total of ~~8,41210,080~~ patients were after the CAG registered with a non ACS diagnosis and subsequently excluded from the further analysis of PCI and CABG (see appendix 3 where the diagnoses that account for 80% of these patients are listed). After CAG the distribution of diagnosis were as follows ~~353.0~~ % of patients were admitted with NSTEMI, 12.62 % with unstable angina, ~~33.25.7~~ with STEMI and 19.20 with non-specific MI.

Table 1 show that from 2001 to 2009 the proportion of patients with NSTEMI receiving a CAG and PCI increased substantially, while the proportion receiving a CABG decreased. During the same period the fraction of patients examined with a CAG who received this within 3 days increased from 18.2 % to 55.72 %. For PCI a similar development was seen with 52.01 % treated within 3 days in 2009 compared to 27.52 % in 2001. For CABG within 7 days the percentage slightly declined over the time period with some fluctuations.

*Insert table 1*

For unstable angina the activity rate increased for CAG, but not for PCI in the period from 2001 to 2009 (table 3) however for both CAG and PCI the rates of patient who received these procedures within 3 days doubled in this time period. For CABG the treatment rate was more than halved.

*Insert table 2*

1  
2  
3  
4 Figure 2a shows the development in the probability of invasive ~~investigation-examination~~ using  
5 CAG from 2001 to 2009 for NSTEMI accounting for the competing risk of death. The figure shows  
6 a significant increase in the use of CAG in the period from 2001 to 2005 with an increase in  
7 probability from 49.8 % for CAG at 60 days in 2001 to 70.466.6 % in 2005 (tested using the Fine  
8 Gray model see results in appendix 4). From 2005 and onwards only a slight increase in probability  
9 of CAG at 60 days was seen. The figure also shows a steady increase in the probability of CAG  
10 within 3 days from 2001 to 2007 followed by a leap from 19.53 % in 2007 to 31.59 % in 2008 and a  
11 further increase to 38.77.5 % in 2009. The fixed treatment protocol seemed to have a significant  
12 effect on the probability of receiving a CAG within 3 days ( $z=4.163.45$   $p\leq 0.001$ ). For PCI (figure  
13 2b) there was only a slight increase in the probability of treatment with PCI at 60 days from 2001 to  
14 2009. Further the probability of PCI treatment within 3 days increased markedly from 2007 to 2008  
15 and again from 2008 to 2009. The effect of the implementation of the fixed treatment protocols also  
16 revealed a significant effect for PCI ( $z=7.4482$   $p<0.001$ ). For CABG the development in treatment  
17 probability was somewhat different with a significant drop in probability of receiving this type of  
18 ~~invasive~~ treatment over the period 2001 to 2006 with subsequent stagnation (figure 1c). The  
19 probability of ~~treatment-CABG~~ within 7 days of CAG decreased significantly over the period and  
20 there seemed to be no effect of the fixed treatment protocols ( $z=0.5032$   $p=0.6275$ ).

21  
22  
23  
24  
25  
26  
27  
28  
29  
30  
31  
32  
33  
34  
35  
36  
37  
38  
39  
40  
41  
42  
43  
44 *Insert figure 2*

45  
46  
47  
48 Figure 3 shows the similar graphs for patient with unstable angina. In general the development was  
49 very similar to that of patients with NSTEMI, but with the increase in the invasive examination and  
50 ~~treatment~~ rate later in the observation period (from 2004 to 2008). The probability of receiving  
51 CAG within 3 days increased ~~fourthree~~-fold from 2001 to 2009 with an almost constant increase  
52  
53  
54  
55  
56  
57  
58  
59  
60



1  
2  
3  
4 (figure 2a). We saw no effect of the fixed treatment protocols on timing of CAGeag ( $z=-0.5076$   
5  
6  $p=0.6244$ ). The PCI treatment rate at 60 days was somewhat stable in the time period with a small  
7  
8 drop in 2004, while the probability of treatment within 3 days increased almost constantly from  
9  
10 2001 to 2009. There was no effect of the fixed treatment protocols ( $z=-0.3223$   $p=0.7582$ ) (figure  
11  
12 2b). For CABG the treatment probability at 60 days decreased in the time period as well as the  
13  
14 treatment probability at 7 days (figure 2c). There was no significant effect of the fixed treatment  
15  
16 protocols. For both NSTEMI and unstable angina there was no significant development in death  
17  
18 before treatment over time i.e. a competing risk (analysis not shown).  
19  
20  
21

22  
23  
24 *Insert figure 3*  
25  
26  
27

28  
29 When including age, sex, number of occluded vessels and LMCA involvement (last two only for  
30  
31 PCI and CABG) we found that for NSTEMI the development in CAG treatment examination  
32  
33 probability at 3 days and 60 days was the same as seen in the unadjusted analyses, and the effect of  
34  
35 the fixed treatment protocols remained significant. For PCI the same pattern was observed, however  
36  
37 when adjusting for number of occluded vessels, the linear effect of year became insignificant, but  
38  
39 the effect of the fixed treatment protocols remained. For CABG the picture did not change after the  
40  
41 adjustment except that the decrease in treatment probability seen at 60 days was not as noticeable as  
42  
43 in the unadjusted analysis. Performing the same adjustments did not change the conclusions for  
44  
45 unstable angina either (See all results from the Fine Gray model in appendix 5).  
46  
47  
48  
49  
50  
51  
52  
53  
54  
55  
56  
57  
58  
59  
60

## Discussion

In this nationwide cohort study, we found a significant increase in the proportions of patients with NSTEMI and unstable angina receiving a CAG and PCI in Denmark between 2001 and 2009, while the proportion receiving CABG decreased. In the analysis accounting for competing risks there was an increase in the probability of [examination and](#) treatment within 3 days for CAG and PCI after 2001 and there seemed to be a significant effect of the introduction of a fixed treatment protocol with recommended maximum time from diagnosis to invasive examination and treatment for NSTEMI, but not for unstable angina.

Our results are in agreement with studies from the US, which showed an increase in the use of CAG and PCI over the last two decades, and a decrease in CABG [\(1, 17, 18\)](#)~~(1, 16, 17)~~. The study also contributes to the interpretation of the findings from a recent Danish study (2), which showed a significant reduction in 30-day and 1-year mortality risk after first time hospitalisation for MI between 1999-2003 and 2004-2008. Part of this reduction could be due to a decrease in time to treatment. When comparing with this study one should keep in mind that we did not include patients with STEMI who are included in Schmidt et al.s study and that these [patients](#) have a succinct treatment path with the need for more urgent treatment. There seems to be no other nationwide studies on trends in time from diagnosis to invasive treatment; however in 2009 Bradley et al reported a decrease in door to balloon time for patients with STEMI after enrolment in a national quality campaign with the aim to reduce the door to balloon time to less than 90 minutes for this group [\(19\)](#)~~(18)~~.

We did find a significant decline in time for CAG and PCI corresponding to implementation of the fixed treatment protocol for NSTEMI. However, for both NSTEMI and unstable angina, we found a

1  
2  
3  
4 steady increase in treatment rate from 2001 and onwards and for NSTEMI a steep increase in  
5  
6 probability already in 2008. This indicates that focus on improvement on time to invasive  
7  
8 examination and treatment is not new. Furthermore the treatment protocols were first implemented  
9  
10 during 2009, but they were already discussed in 2008 and this could have led to early  
11  
12 implementation and hence an increase in speed of invasive examination and treatment before the  
13  
14 actual implementation. In this time period there seemed to be a general agreement on the benefits of  
15  
16 an invasive strategy vs. medical management for patients with NSTEMI (20, 21)(19, 20). However  
17  
18 the optimal timing of invasive interventions was not clearly agreed upon. Mehta et al published in  
19  
20 2009 their results from the large TIMACS trial which included 3031 patients with unstable angina  
21  
22 or NSTEMI. They found a significantly lower risk of death, myocardial infarction or stroke at 6  
23  
24 months for high risk patients when comparing an early (less than 24 h) with a delayed strategy  
25  
26 (more than 36 h). Furthermore they found no safety issues related to thean\_early\_strategy (22). This  
27  
28 reflects-shows the importance of early invasive treatment however theise results only reflect the  
29  
30 difference between very early and early invasive intervention which is a slightly other discussion  
31  
32 than ours. In 2010 a meta-analysis was published combining four trials which concluded that early  
33  
34 angiography and if relevant treatment for patients with NSTEMI reduces the risk of recurrent  
35  
36 ischemia and shortens hospital stay (23). These results were however not reflected in the European  
37  
38 Society of Cardiology guidelines until 2011 (4). However the previous guideline from 2007 (p. 27)  
39  
40 also stated: "...Accordingly, currently available evidence does not mandate a systematic approach  
41  
42 of immediate angiography in NSTEMI-ACS patients stabilized with a contemporary pharmacological  
43  
44 approach. Likewise, routine practice of immediate transfer of stabilized patients admitted in  
45  
46 hospitals without onsite catheterization facilities is not mandatory, but should be organized within 72  
47  
48 h" (7). We found that the number of patients receiving the recommended invasive examination and  
49  
50 treatment within the recommend time frame increased from 2001 to 2009, however a large group of  
51  
52  
53  
54  
55  
56  
57  
58  
59  
60

1  
2  
3  
4 patient still received no invasive investigation or were treated later than the guideline recommends  
5  
6 in 2009. This patient group consists of three possible groups: patients that don't have the disease in  
7  
8 question due to lack of validity of data (see later discussion of strengths and weaknesses), patients  
9  
10 who are too ill to be treated and patients who receive a less than optimal treatment. The basic idea  
11  
12 behind the fixed treatment protocol i.e. same treatment for patients presenting with the same clinical  
13  
14 symptoms irrespective of when or where patients come in contact with the health care system  
15  
16 should ensure that the latter group is proportionally smaller in 2009 than in 2001. However, there  
17  
18 could still be patients who don't receive optimal treatment and unexplained variation between  
19  
20 hospitals. Therefor monitoring by health authorities is of great importance.  
21  
22  
23  
24

### 25 26 27 **Strengths and weaknesses**

28  
29 The primary strength of this study is the large unselected patient population, as it covers all patients  
30  
31 admitted with first time ACS in the period from 2001 to 2009 in Denmark. The patients were  
32  
33 identified in the NPR, however this means that we do not have information on biomarkers but  
34  
35 solely rely on the correctness on what is registered in the NPR. We excluded outpatients and  
36  
37 patients with a diagnosis from an emergency room which was not verified in a ward subsequently,  
38  
39 however especially the unstable angina diagnosis is still problematic. Thus, it has been found that  
40  
41 the positive predictive value of unstable angina for patients discharged from a ward only seems to  
42  
43 around 40 % (12). Therefor one reason for the lack of effect of the fixed treatment protocols for this  
44  
45 group of patients could be that a substantial part of this group does not have unstable angina and  
46  
47 data from this register are considered to have a high quality for patients with a coronary heart  
48  
49 disease diagnosis. Thus, a previous study found a positive predictive value for myocardial infarction  
50  
51 in the NPR of 98 % (23). However this means that we do not have information on biomarkers but  
52  
53 solely rely on the correctness on what is registered in the NPR. The data in the NPR allowed us to  
54  
55  
56  
57  
58  
59  
60

1  
2  
3  
4 follow patients through the course of diagnosis and treatment path, and we utilised this to change  
5  
6 patients' diagnoses after the CAG in case another diagnosis was registered at this point in time. This  
7  
8 was done in order to imitate the clinical situation. At CAG ~~8,412,080~~ patients had a diagnosis  
9  
10 other than ACS. The largest group was 3,230,721 patients with aAngina no specification. This group  
11  
12 of patients could potentially be patients with unstable angina however including this group did not  
13  
14 change the conclusions (analysis not shown). We had information on the specific hour of admission  
15  
16 and used this information to calculate time to treatment. Although the validity of this information  
17  
18 can be questioned, we used it in order to calculate the time as precisely as possible. We only  
19  
20 included treatment and examination within 60 days as ACS is an acute disease for which treatment  
21  
22 if relevant should be initiated as soon as possible. We analysed our data by use of statistical  
23  
24 methods that accounted for the competing risk of death, which is very important when we estimate  
25  
26 trends in time to treatment in a population with a high risk of death. However we do not know  
27  
28 whether patients who died were not treated because the risk of invasive examination and treatment  
29  
30 was deemed too high, or because the treatment was not considered relevant. Our analysis showed  
31  
32 that the group of patients not receiving CAG was reduced in the period from 2001 to 2009, which  
33  
34 was primarily due to an increase in treatment-examination of elderly patients (analysis not shown).  
35  
36 We also included information on the number of occluded vessels and LMCA involvement as a  
37  
38 measure of the extension and severity of the disease in the analysis. This information was only  
39  
40 available for ~~84.75-6~~% and 82.12% of the patients and especially patients from 2001 and 2002 had  
41  
42 missing information on this variable. However, we have no reason to believe that this missing data  
43  
44 should be non-random and related to time to treatment. Further we did not use age standardised data  
45  
46 in the trend analyses because the fixed treatments protocols include all patient groups. However, we  
47  
48 tested whether there was an effect of the treatment protocols in the Fine-Gray model which  
49  
50 adjusted for age, gender, LMCA involvement and number of occluded vessels. The analyses  
51  
52  
53  
54  
55  
56  
57  
58  
59  
60

1  
2  
3  
4 showed that these variables did not change the effect of the treatment protocols. It should also be  
5  
6 noticed that we did not include patients who died before ~~admission to arrival to a~~ hospital as these  
7  
8 patients are not included in the NPR. It should also be noticed that our study is an observational  
9  
10 trend study and we cannot exclude that other organizational or treatment factors than the  
11  
12 introduction of the fixed treatment protocol has contributed to the observed reduction in time to  
13  
14 examination and treatment. This study only evaluates the immediate effects of the fixed treatment  
15  
16 protocols; however a longer follow up would also be of interest.  
17  
18  
19  
20  
21  
22  
23

24 **In conclusion, this study** contributes to the interpretation of the recent decline in mortality after  
25  
26 hospitalisation for MI by showing a contemporary increase in the proportion of patients receiving a  
27  
28 CAG and PCI as well as an increase in the probability of patients receiving CAG and PCI within the  
29  
30 recommended time. The study also suggest that the introduction of fixed treatment protocols with a  
31  
32 recommended maximum time from diagnosis to invasive examination and treatment may have  
33  
34 impacted on time to treatment- as more patients receive a CAG and PCI within the time limit of 3  
35  
36 days around the time of the introduction of the protocols.  
37  
38  
39  
40  
41

42 **Contributors: SM, DGH, EP, ADOZ, MO contributed to the design of the study. SM carried**  
43  
44 **out statistical analysis with guidance from PKA and MO. SM wrote initial draft and all**  
45  
46 **authors critically revised the manuscript.**  
47  
48  
49

## 50 **Funding**

51  
52  
53  
54  
55  
56  
57  
58  
59  
60

1  
2  
3  
4 This work was supported by the Danish Heart Association [grant number 10-04-R78-A2806-  
5  
6 22609], The Health Insurance Foundation [grant number 2011B037], Fabrikant Ejner Willumsens  
7  
8 Mindelegat og Aase og Ejner Danielsens Foundation.  
9

10  
11  
12  
13 **Competing interest:** None  
14

### 15 16 17 **Ethics** 18

19 This register based study was approved the Danish Data Protection Agency (Approval number  
20  
21 2010-41-5263). Register based studies does not need approval by a medical ethics committee in  
22  
23 Denmark.  
24  
25  
26  
27  
28  
29  
30  
31  
32  
33  
34  
35  
36  
37  
38  
39  
40  
41  
42  
43  
44  
45  
46  
47  
48  
49  
50  
51  
52  
53  
54  
55  
56  
57  
58  
59  
60

**Table 1: Coronary angiography (CAG), Percutaneous coronary intervention (PCI) and Coronary artery bypass grafting (CABG) treatment rates and number treated within 3/7 days distributed according to covariates for patients with first time Non ST elevation myocardial infarction (NSTEMI)**

| NSTEMI                     |               | Diagnosis at initial examination |        |              | Diagnosis registered after CAG                                |       |              |                              |       |              |
|----------------------------|---------------|----------------------------------|--------|--------------|---------------------------------------------------------------|-------|--------------|------------------------------|-------|--------------|
|                            |               | CAG within 60 days               |        |              | PCI within 60 days (Grouped according to after CAG diagnosis) |       |              | CABG within 60 days from CAG |       |              |
|                            |               | Treatment rate %                 | n      | % in 3 days* | Treatment rate %                                              | N     | % in 3 days* | Treatment rate %             | n     | % in 7 days* |
| Overall                    | 18,947        | 63.3                             | 11,997 | 31.8         | 52.7                                                          | 5,984 | 30.7         | 16.2                         | 1,836 | 26.3         |
| Year of diagnosis          |               |                                  |        |              |                                                               |       |              |                              |       |              |
|                            | 2001          | 49.8                             | 8,237  | 18.2         | 48.4                                                          | 2,552 | 27.5         | 23.0                         | 1,211 | 29.5         |
|                            | 2002          | 54.9                             | 1,177  | 19.9         | 49.6                                                          | 465   | 24.8         | 22.8                         | 214   | 23.7         |
|                            | 2003          | 58.7                             | 1,355  | 26.2         | 51.4                                                          | 597   | 21.2         | 19.5                         | 226   | 38.5         |
|                            | 2004          | 61.3                             | 1,422  | 23.2         | 54.3                                                          | 673   | 24.2         | 17.8                         | 221   | 35.5         |
|                            | 2005          | 67.7                             | 1,480  | 26.6         | 56.7                                                          | 771   | 23.7         | 16.2                         | 220   | 25.7         |
|                            | 2006          | 68.0                             | 1,401  | 28.9         | 55.1                                                          | 792   | 24.6         | 13.1                         | 188   | 23.3         |
|                            | 2007          | 66.9                             | 1,438  | 30.7         | 49.5                                                          | 728   | 27.4         | 16.5                         | 243   | 15.3         |
|                            | 2008          | 70.5                             | 1,533  | 46.2         | 50.3                                                          | 817   | 38.9         | 13.2                         | 214   | 24.7         |
|                            | 2009          | 70.0                             | 1,368  | 55.7         | 55.3                                                          | 886   | 52.0         | 11.8                         | 189   | 23.0         |
| Gender                     | Men           | 70.8                             | 8,072  | 32.3         | 56.3                                                          | 4,247 | 30.8         | 18.8                         | 1,424 | 25.7         |
|                            | Women         | 52.1                             | 3,791  | 29.4         | 47.0                                                          | 1,615 | 26.9         | 11.2                         | 386   | 28.0         |
| Age                        | 30 or younger | 86.7                             | 262    | 37.5         | 15.0                                                          | 33    | 66.7         | --                           | --    | --           |
|                            | 30-39         | 91.5                             | 2,252  | 44.3         | 53.1                                                          | 1,111 | 42.9         | 2.3                          | 55    | 60.0         |
|                            | 40-49         | 91.4                             | 1,093  | 40.6         | 59.2                                                          | 599   | 42.4         | 7.0                          | 727   | 33.8         |
|                            | 50-59         | 89.4                             | 2,521  | 33.2         | 61.0                                                          | 1,459 | 29.8         | 12.5                         | 302   | 28.3         |
|                            | 60-69         | 84.0                             | 3,543  | 29.8         | 52.5                                                          | 1,703 | 28.3         | 20.8                         | 675   | 25.6         |
|                            | 70-79         | 66.1                             | 3,337  | 27.6         | 47.9                                                          | 1,472 | 25.9         | 21.7                         | 665   | 23.7         |
|                            | 80 or older   | 21.8                             | 1,118  | 31.2         | 49.7                                                          | 515   | 27.5         | 8.7                          | 91    | 33.3         |
| LMCA** involvement         | Yes           |                                  |        |              | 18.7                                                          | 394   | 33.3         | 65.6                         | 137   | 50.4         |
|                            | No            |                                  |        |              | 54.6                                                          | 4,885 | 32.1         | 14.3                         | 1,276 | 24.9         |
| Number of occluded vessels | 0             |                                  |        |              | 1.9                                                           | 226   | 31.8         | 0.3                          | 46    | 50.0         |
|                            | 1 vessel      |                                  |        |              | 78.5                                                          | 2,592 | 36.2         | 1.5                          | 49    | 36.7         |
|                            | 2 vessels     |                                  |        |              | 71.7                                                          | 1,393 | 32.0         | 12.7                         | 246   | 23.4         |
|                            | 3 vessels     |                                  |        |              | 30.0                                                          | 630   | 30.1         | 49.3                         | 103   | 29.6         |

\* National guidelines recommend CAG and PCI within 3 days of diagnosis and CABG within 7 days of CAG.

\*\* Left Main Coronary Artery



**Table 2: Coronary angiography (CAG), Percutaneous coronary intervention (PCI) and Coronary artery bypass grafting (CABG) treatment rates and number treated within 3/7 days distributed according to covariates for patients with first time Unstable Angina**

| Unstable angina            |               | Diagnosis at initial examination |       |              | Diagnosis registered after CAG                                |        |              |                              |       |              |
|----------------------------|---------------|----------------------------------|-------|--------------|---------------------------------------------------------------|--------|--------------|------------------------------|-------|--------------|
|                            |               | CAG within 60 days               |       |              | PCI within 60 days (Grouped according to after CAG diagnosis) |        |              | CABG within 60 days from CAG |       |              |
|                            |               | Treatment Examination rate %     | n     | % in 3 days* | Treatment rate %                                              | n      | % in 3 days* | Treatment rate %             | n     | % in 7 days* |
| Overall                    | 8,820         | 71.4                             | 6,300 | 44.2         | 49.7                                                          | 2,031  | 38.9         | 18.0                         | 7,357 | 43.7         |
| Year of diagnosis          | 2001          | 59.9                             | 631   | 30.2         | 51.3                                                          | 224    | 24.9         | 26.8                         | 117   | 47.2         |
|                            | 2002          | 61.0                             | 649   | 32.0         | 47.6                                                          | 200    | 31.2         | 28.8                         | 121   | 44.5         |
|                            | 2003          | 64.5                             | 633   | 37.1         | 49.5                                                          | 206    | 33.5         | 22.8                         | 95    | 55.3         |
|                            | 2004          | 72.3                             | 663   | 33.1         | 43.4                                                          | 170    | 23.3         | 20.4                         | 80    | 53.4         |
|                            | 2005          | 74.1                             | 705   | 43.1         | 51.2                                                          | 229    | 38.1         | 14.5                         | 65    | 36.7         |
|                            | 2006          | 74.3                             | 753   | 44.6         | 52.3                                                          | 228    | 39.9         | 14.0                         | 61    | 42.1         |
|                            | 2007          | 78.3                             | 720   | 51.9         | 49.2                                                          | 214    | 43.0         | 15.9                         | 69    | 30.0         |
|                            | 2008          | 82.1                             | 823   | 55.5         | 50.4                                                          | 317    | 52.6         | 11.6                         | 73    | 42.0         |
|                            | 2009          | 79.0                             | 723   | 62.0         | 50.9                                                          | 243    | 51.1         | 11.3                         | 54    | 29.2         |
| Gender                     | Men           | 74.9                             | 3,719 | 44.6         | 51.6                                                          | 1,318  | 39.5         | 21.4                         | 549   | 44.1         |
|                            | Women         | 66.7                             | 2,305 | 37.7         | 48.2                                                          | 658    | 33.4         | 12.0                         | 166   | 41.7         |
| Age                        | 30 or younger | 64.3                             | 182   | 61.1         | -                                                             | -      | -            | 14.3                         | 1     | -0           |
|                            | 30-39         | 71.4                             | 177   | 43.0         | 39.1                                                          | 34     | 52.9         | 4.5                          | 4     | 25.0         |
|                            | 40-49         | 75.6                             | 684   | 43.7         | 49.5                                                          | 207    | 45.8         | 7.3                          | 31    | 50.0         |
|                            | 50-59         | 80.4                             | 1,562 | 40.0         | 54.0                                                          | 534    | 39.9         | 13.8                         | 137   | 37.0         |
|                            | 60-69         | 78.3                             | 1,841 | 42.7         | 50.3                                                          | 609    | 36.1         | 21.8                         | 265   | 46.7         |
|                            | 70-79         | 70.7                             | 1,350 | 40.8         | 46.9                                                          | 429    | 32.3         | 26.7                         | 244   | 42.7         |
|                            | 80 or older   | 37.8                             | 392   | 45.8         | 55.3                                                          | 163    | 34.7         | 11.0                         | 33    | 50.0         |
| LMCA* involvement          | yes           |                                  |       |              | 14.8                                                          | 21     | 47.6         | 75.4                         | 10    | 60.0         |
|                            | No            |                                  |       |              | 52.6                                                          | 1,684  | 39.7         | 15.5                         | 496   | 39.8         |
| Number of occluded vessels | 0             |                                  |       |              | 1.9                                                           | 11     | 50.0         | 0.5                          | 3     | 0.3          |
|                            | 1 vessel      |                                  |       |              | 79.1                                                          | 10,101 | 44.1         | 2.3                          | 30    | 40.0         |
|                            | 2 vessels     |                                  |       |              | 67.1                                                          | 451    | 36.7         | 19.6                         | 13    | 42.3         |
|                            | 3 vessels     |                                  |       |              | 26.5                                                          | 186    | 31.8         | 58.3                         | 40    | 43.8         |

\* National guidelines recommend CAG and PCI within 3 days of diagnosis and CABG within 7 days of CAG.

\*\* Left Main Coronary Artery

## Reference List

1. Fox KA, Steg PG, Eagle KA, Goodman SG, Anderson FA, Jr., Granger CB, Flather MD, Budaj A, Quill A, Gore JM. Decline in rates of death and heart failure in acute coronary syndromes, 1999-2006. *JAMA* 2007;**297**(17):1892-1900.
2. Schmidt M, Jacobsen JB, Lash TL, Botker HE, Sorensen HT. 25 year trends in first time hospitalisation for acute myocardial infarction, subsequent short and long term mortality, and the prognostic impact of sex and comorbidity: a Danish nationwide cohort study. *BMJ* 2012;**344**:e356.
3. Ford ES, Ajani UA, Croft JB, Critchley JA, Labarthe DR, Kottke TE, Giles WH, Capewell S. Explaining the decrease in U.S. deaths from coronary disease, 1980-2000. *N Engl J Med* 2007;**356**(23):2388-2398.
4. Hamm CW, Bassand JP, Agewall S, Bax J, Boersma E, Bueno H, Caso P, Dudek D, Gielen S, Huber K, Ohman M, Petrie MC, Sonntag F, Uva MS, Storey RF, Wijns W, Zahger D, Bax JJ, Auricchio A, Baumgartner H, Ceconi C, Dean V, Deaton C, Fagard R, Funck-Brentano C, Hasdai D, Hoes A, Knuuti J, Kolh P, McDonagh T, Moulin C, Poldermans D, Popescu BA, Reiner Z, Sechtem U, Sirnes PA, Torbicki A, Vahanian A, Windecker S, Windecker S, Achenbach S, Badimon L, Bertrand M, Botker HE, Collet JP, Crea F, Danchin N, Falk E, Goudevenos J, Gulba D, Hambrecht R, Herrmann J, Kastrati A, Kjeldsen K, Kristensen SD, Lancellotti P, Mehilli J, Merkely B, Montalescot G, Neumann FJ, Neyses L, Perk J, Roffi M, Romeo F, Ruda M, Swahn E, Valgimigli M, Vrints CJ, Widimsky P. ESC Guidelines for the management of acute coronary syndromes in patients presenting without persistent ST-segment elevation: The Task Force for the management of acute coronary syndromes (ACS) in patients presenting without persistent ST-segment elevation of the European Society of Cardiology (ESC). *Eur Heart J* 2011;**32**(23):2999-3054.
5. Pedersen KM, Christiansen T, Bech M. The Danish health care system: evolution--not revolution--in a decentralized system. *Health Econ* 2005;**14**(Suppl 1):S41-S57.
6. Danish National Board of Health. Treatment protocols for unstable angina and acute myocardial infarction without ST-segment elevation  
<http://www.sst.dk/Udgivelser/2009/Pakkeforloeb%20for%20ustabil%20angina%20pectoris%20UAP%20og%20akut%20myokardieinfakt%20uden%20st-elevation%20NSTEMI.aspx>. 2009.
7. Bassand JP, Hamm CW, Ardissino D, Boersma E, Budaj A, Fernandez-Aviles F, Fox KA, Hasdai D, Ohman EM, Wallentin L, Wijns W. Guidelines for the diagnosis and treatment of non-ST-segment elevation acute coronary syndromes. *Eur Heart J* 2007;**28**(13):1598-1660.
8. Lynge E, Sandegaard JL, Rebolj M. The Danish National Patient Register. *Scand J Public Health* 2011;**39**(7 Suppl):30-33.
9. Green A. Danish clinical databases: an overview. *Scand J Public Health* 2011;**39**(7 Suppl):68-71.

10. Abildstrom SZ, Madsen M. The Danish Heart Register. *Scand J Public Health* 2011;**39**(7 Suppl):46-49.
11. Helweg-Larsen K. The Danish Register of Causes of Death. *Scand J Public Health* 2011;**39**(7 Suppl):26-29.
12. Joensen AM, Jensen MK, Overvad K, Dethlefsen C, Schmidt E, Rasmussen L, Tjonneland A, Johnsen S. Predictive values of acute coronary syndrome discharge diagnoses differed in the Danish National Patient Registry. *J Clin Epidemiol* 2009;**62**(2):188-194.
13. Andersen PK, Geskus RB, de WT, Putter H. Competing risks in epidemiology: possibilities and pitfalls. *Int J Epidemiol* 2012.
14. Jensen LO, Thayssen P. [Treatment and prognosis after acute coronary syndrome in an unselected patient population]. *Ugeskr Laeger* 2007;**169**(6):492-497.
15. Nikus KC, Eskola MJ, Virtanen VK, Harju J, Huhtala H, Mikkelsen J, Karhunen PJ, Niemela KO. Mortality of patients with acute coronary syndromes still remains high: a follow-up study of 1188 consecutive patients admitted to a university hospital. *Ann Med* 2007;**39**(1):63-71.
16. Lee JT, Netuveli G, Majeed A, Millett C. The effects of pay for performance on disparities in stroke, hypertension, and coronary heart disease management: interrupted time series study. *PLoS One* 2011;**6**(12):e27236.
17. McManus DD, Gore J, Yarzebski J, Spencer F, Lessard D, Goldberg RJ. Recent trends in the incidence, treatment, and outcomes of patients with STEMI and NSTEMI. *Am J Med* 2011;**124**(1):40-47.
18. Peterson ED, Shah BR, Parsons L, Pollack CV, Jr., French WJ, Canto JG, Gibson CM, Rogers WJ. Trends in quality of care for patients with acute myocardial infarction in the National Registry of Myocardial Infarction from 1990 to 2006. *Am Heart J* 2008;**156**(6):1045-1055.
19. Bradley EH, Nallamothu BK, Herrin J, Ting HH, Stern AF, Nembhard IM, Yuan CT, Green JC, Kline-Rogers E, Wang Y, Curtis JP, Webster TR, Masoudi FA, Fonarow GC, Brush JE, Jr., Krumholz HM. National efforts to improve door-to-balloon time results from the Door-to-Balloon Alliance. *J Am Coll Cardiol* 2009;**54**(25):2423-2429.
20. Bavry AA, Kumbhani DJ, Rassi AN, Bhatt DL, Askari AT. Benefit of early invasive therapy in acute coronary syndromes: a meta-analysis of contemporary randomized clinical trials. *J Am Coll Cardiol* 2006;**48**(7):1319-1325.
21. Fox KA, Poole-Wilson PA, Henderson RA, Clayton TC, Chamberlain DA, Shaw TR, Wheatley DJ, Pocock SJ. Interventional versus conservative treatment for patients with unstable angina or non-ST-elevation myocardial infarction: the British Heart Foundation RITA 3 randomised trial. Randomized Intervention Trial of unstable Angina. *Lancet* 2002;**360**(9335):743-751.
22. Mehta SR, Granger CB, Boden WE, Steg PG, Bassand JP, Faxon DP, Afzal R, Chrolavicius S, Jolly SS, Widimsky P, Avezum A, Rupprecht HJ, Zhu J, Col J, Natarajan MK, Horsman C,

1  
2  
3  
4 Fox KA, Yusuf S. Early versus delayed invasive intervention in acute coronary syndromes. *N Engl J Med* 2009;**360**(21):2165-2175.  
5  
6

- 7 23. Katritsis DG, Siontis GC, Kastrati A, van't Hof AW, Neumann FJ, Siontis KC, Ioannidis JP.  
8 Optimal timing of coronary angiography and potential intervention in non-ST-elevation acute  
9 coronary syndromes. *Eur Heart J* 2011;**32**(1):32-40.  
10  
11  
12  
13  
14  
15  
16  
17  
18  
19  
20  
21  
22  
23  
24  
25  
26  
27  
28  
29  
30  
31  
32  
33  
34  
35  
36  
37  
38  
39  
40  
41  
42  
43  
44  
45  
46  
47  
48  
49  
50  
51  
52  
53  
54  
55  
56  
57  
58  
59  
60

For peer review only

1  
2  
3  
4 **Appendix 1: Treatment codes (SKS codes)**  
5

6 CAG: UXAC85, UXAC85A, UXAC85B, UXAC85C or UXAC85D;  
7  
8

9  
10  
11 PCI: KFNG, KFNG00, KFNG02, KFNG05, KFNG10, KFNG12, KFNG20, KFNG22, KFNG30,  
12  
13 KFNG40, KFNG96;  
14

15  
16  
17 CABG: KFNA, KFNA00, KFNA10, KFNA20, KFNC, KFNC10, KFNC20, KFNC30, KFNC40,  
18  
19  
20 KFNC50, KFNC60, KFNC96, KFND, KFND10, KFND20, KFND96, KFNE, KFNE00, KFND10,  
21  
22  
23 KFNE20, KFND96.  
24  
25  
26  
27  
28  
29  
30  
31  
32  
33  
34  
35  
36

37 **ACS:** Acute coronary heart syndrome  
38 **STEMI:** ST elevation myocardial infarction  
39 **NSTEMI:** Non ST elevation myocardial infarction  
40 **AMI:** Acute myocardial infarction  
41 **CAG:** Coronary angiography  
42 **CABG:** Coronary artery bypass grafting  
43 **PCI:** Percutaneous coronary intervention  
44  
45  
46  
47  
48  
49  
50  
51  
52  
53  
54  
55  
56  
57  
58  
59  
60

1  
2  
3  
4  
5  
6  
7  
8  
9  
10  
11  
12  
13  
14  
15  
16  
17  
18  
19  
20  
21  
22  
23  
24  
25  
26  
27  
28  
29  
30  
31  
32  
33  
34  
35  
36  
37  
38  
39  
40  
41  
42  
43  
44  
45  
46  
47  
48  
49  
50  
51  
52  
53  
54  
55  
56  
57  
58  
59  
60

## Appendix 2: Definition of time to treatment

Both date and clock-time is important in relation to the definition of time to treatment. Date is available for all patients for both admission and procedure while clock-time was missing in some cases. For patients for whom information on clock time of admission was missing, time of admission was defined as one hour before the time registration for the CAG (n=498). For example, if a patient was admitted on the 10<sup>th</sup> of June with missing time information and had a CAG on June 11<sup>th</sup> at 10 AM then the waiting time would be set at 25 hours. Conversely, if time information on CAG (n=109), PCI (n=195) or CABG (n=335) was missing, then the hour of CAG, PCI and CABG was defined as one hour after the time registered at the initial admission. This ensured that the dates of admission were still used, but that the waiting time could not end up being negative. Patients without information on both the time of initial presentation and time of CAG (n=2), PCI (n=1) and CABG (n=5) respectively were excluded from the analysis. If a patient received both PCI and CABG, then only the first treatment received was included in the analysis.

**Appendix 3: Distribution of diagnosis for patients with a non acute coronary heart syndrome diagnosis at coronary angiography**

| Specification                                        | SKS-code | Number       | %           |
|------------------------------------------------------|----------|--------------|-------------|
| Hypertension arterialis essentialis                  | DI109    | 124          | 1.5         |
| Angina pectoris no specification                     | DI209    | 3,231        | 38.4        |
| Angina pectoris (stable)                             | DI251    | 1,414        | 16.8        |
| Former myokardial infarction                         | DI252    | 572          | 6.8         |
| Chronic ischemic heart disease without specification | DI259    | 297          | 3.5         |
| Aorta valve stenose, non reumatoid                   | DI350    | 145          | 1.7         |
| Heart failure no specification                       | DI509    | 122          | 1.5         |
| Chest pain no specification                          | DR079    | 114          | 1.4         |
| Observation myocardial infarction                    | DZ034    | 203          | 2.4         |
| Observation heart disease                            | DZ035    | 574          | 6.8         |
| <b>Sub total</b>                                     |          | <b>6,795</b> | <b>81.3</b> |
| Other                                                | Other    | 1,617        | 19.2        |
| <b>Total</b>                                         |          | <b>8,413</b> | <b>100</b>  |

## Appendix 4: Additional results for NSTEMI

### 4.1. Results from the Fine Grey model for NSTEMI at 3 days (CAG/PCI) and 7 days (CABG)

#### 4.1.a CAG

| NSTEMI                    | Year categorical<br>n=18,947 |           | Year continuous<br>n=18,947 |           | + fixed treatment<br>protocols<br>n=18,947 |           | + age<br>n=18,676 |              | + sex<br>n=18,676 |              |
|---------------------------|------------------------------|-----------|-----------------------------|-----------|--------------------------------------------|-----------|-------------------|--------------|-------------------|--------------|
|                           | β                            | CI 95     | β                           | CI 95     | β                                          | CI 95     | β                 | CI 95        | β                 | CI 95        |
| Year                      |                              |           |                             |           |                                            |           |                   |              |                   |              |
| 2001                      | 0                            |           | 0.21                        | 0.19-0.22 | 0.19                                       | 0.17-0.20 | 0.19              | 0.17-0.20    | 0.19              | 0.17-0.20    |
| 2002                      | 0.22                         | 0.01-0.43 |                             |           |                                            |           |                   |              |                   |              |
| 2003                      | 0.57                         | 0.37-0.77 |                             |           |                                            |           |                   |              |                   |              |
| 2004                      | 0.49                         | 0.29-0.69 |                             |           |                                            |           |                   |              |                   |              |
| 2005                      | 0.74                         | 0.54-0.93 |                             |           |                                            |           |                   |              |                   |              |
| 2006                      | 0.86                         | 0.67-1.06 |                             |           |                                            |           |                   |              |                   |              |
| 2007                      | 0.92                         | 0.73-1.11 |                             |           |                                            |           |                   |              |                   |              |
| 2008                      | 1.48                         | 1.29-1.66 |                             |           |                                            |           |                   |              |                   |              |
| 2009                      | 1.71                         | 1.53-1.89 |                             |           |                                            |           |                   |              |                   |              |
| Fixed treatment protocols |                              |           |                             |           | 0.22                                       | 0.11-0.32 | 0.25              | 0.15-0.35    | 0.25              | 0.15-0.35    |
| Age                       |                              |           |                             |           |                                            |           |                   |              |                   |              |
| Ref: < 50                 |                              |           |                             |           |                                            |           | 0                 |              | 0                 |              |
| 50-59                     |                              |           |                             |           |                                            |           | -0.23             | -0.34(-0.12) | -0.23             | -0.34(-0.12) |
| 60-79                     |                              |           |                             |           |                                            |           | -0.63             | -0.72(-0.53) | -0.61             | -0.71(-0.51) |
| >80                       |                              |           |                             |           |                                            |           | -1.89             | -2.03(-1.75) | -1.83             | -1.97(-1.69) |
| Sex                       |                              |           |                             |           |                                            |           |                   |              |                   |              |
| Men                       |                              |           |                             |           |                                            |           |                   |              | 0                 |              |
| Women                     |                              |           |                             |           |                                            |           |                   |              | -0.19             | -0.26(-0.12) |

#### 4.1.b PCI

| NSTEMI                             | Year categorical<br>n=11,357 |            | Year continuous<br>n=11,357 |           | + fixed treatment<br>protocols<br>n=11,357 |           | + age<br>n=11,131 |              | + sex<br>n=11,131 |              | + Number of occluded<br>vessels and LMCA<br>involvement, n=7,076 |              |
|------------------------------------|------------------------------|------------|-----------------------------|-----------|--------------------------------------------|-----------|-------------------|--------------|-------------------|--------------|------------------------------------------------------------------|--------------|
|                                    | β                            | CI 95      | β                           | CI 95     | β                                          | CI 95     | β                 | CI 95        | β                 | CI 95        | β                                                                | CI 95        |
| Year                               |                              |            |                             |           |                                            |           |                   |              |                   |              |                                                                  |              |
| 2001                               | 0                            |            | 0.14                        | 0.11-0.16 | 0.07                                       | 0.05-0.10 | 0.07              | 0.04-0.10    | 0.07              | 0.04-0.10    | 0.01                                                             | -0.02-0.05   |
| 2002                               | -0.07                        | -0.38-0.23 |                             |           |                                            |           |                   |              |                   |              |                                                                  |              |
| 2003                               | -0.20                        | -0.51-0.10 |                             |           |                                            |           |                   |              |                   |              |                                                                  |              |
| 2004                               | 0.02                         | -0.27-0.31 |                             |           |                                            |           |                   |              |                   |              |                                                                  |              |
| 2005                               | 0.02                         | -0.27-0.31 |                             |           |                                            |           |                   |              |                   |              |                                                                  |              |
| 2006                               | 0.03                         | -0.25-0.32 |                             |           |                                            |           |                   |              |                   |              |                                                                  |              |
| 2007                               | 0.07                         | -0.21-0.35 |                             |           |                                            |           |                   |              |                   |              |                                                                  |              |
| 2008                               | 0.45                         | 0.18-0.71  |                             |           |                                            |           |                   |              |                   |              |                                                                  |              |
| 2009                               | 0.91                         | 0.65-1.17  |                             |           |                                            |           |                   |              |                   |              |                                                                  |              |
| Fixed treatment protocols          |                              |            |                             |           | 0.55                                       | 0.40-0.69 | 0.59              | 0.45-0.74    | 0.59              | 0.44-0.74    | 0.57                                                             | 0.41-0.73    |
| Age (ref = < 50)                   |                              |            |                             |           |                                            |           |                   |              |                   |              |                                                                  |              |
| 50-59                              |                              |            |                             |           |                                            |           | 0                 |              | 0                 |              | 0                                                                |              |
| 60-79                              |                              |            |                             |           |                                            |           | -0.24             | -0.38(-0.09) | -0.24             | -0.39(-0.09) | -0.31                                                            | -0.47(-0.15) |
| >80                                |                              |            |                             |           |                                            |           | -0.60             | -0.74(-0.47) | -0.59             | -0.72(-0.45) | -0.55                                                            | -0.70(-0.41) |
| Sex (ref=men)                      |                              |            |                             |           |                                            |           |                   |              |                   |              |                                                                  |              |
| Women                              |                              |            |                             |           |                                            |           |                   |              | 0                 |              | 0                                                                |              |
|                                    |                              |            |                             |           |                                            |           |                   |              | -0.28             | -0.40(-0.17) | -0.13                                                            | -0.24(-0.01) |
| LMCA involvement (ref=no)          |                              |            |                             |           |                                            |           |                   |              |                   |              |                                                                  |              |
| Yes                                |                              |            |                             |           |                                            |           |                   |              |                   |              | 0                                                                |              |
|                                    |                              |            |                             |           |                                            |           |                   |              |                   |              | 0.65                                                             | 0.05-1.26    |
| Number of occluded vessels (ref=1) |                              |            |                             |           |                                            |           |                   |              |                   |              |                                                                  |              |
| 2                                  |                              |            |                             |           |                                            |           |                   |              |                   |              | 0                                                                |              |
| 3                                  |                              |            |                             |           |                                            |           |                   |              |                   |              | -0.13                                                            | -0.24(-0.01) |
|                                    |                              |            |                             |           |                                            |           |                   |              |                   |              | -1.06                                                            | -1.22(-0.89) |



4.1.c. CABG

| NSTEMI                             | Year categorical<br>n=11,357 | Year continuous<br>n=11,357 | + fixed treatment<br>protocols<br>n=11,357 | + age<br>n=11,131  | + sex<br>n=11,131    | + Number of occluded<br>vessels and LMCA<br>involvement, n=7,076 |
|------------------------------------|------------------------------|-----------------------------|--------------------------------------------|--------------------|----------------------|------------------------------------------------------------------|
| Year                               | $\beta$ CI 95                | $\beta$ CI 95               | $\beta$ CI 95                              | B CI 95            | $\beta$ CI 95        | $\beta$ CI 95                                                    |
| 2001                               | 0                            | -0.13 -0.17(-0.10)          | -0.14 -0.19(-0.10)                         | -0.13 -0.18(-0.09) | -0.13 -0.18(-0.09)   | -0.20 -0.25(-0.14)                                               |
| 2002                               | -0.25 -0.70-0.20             |                             |                                            |                    |                      |                                                                  |
| 2003                               | 0.08 -0.33-0.50              |                             |                                            |                    |                      |                                                                  |
| 2004                               | -0.08 -0.50-0.34             |                             |                                            |                    |                      |                                                                  |
| 2005                               | -0.50 -0.94(-0.05)           |                             |                                            |                    |                      |                                                                  |
| 2006                               | -0.83 -1.30(-0.36)           |                             |                                            |                    |                      |                                                                  |
| 2007                               | -0.93 -1.41(-0.45)           |                             |                                            |                    |                      |                                                                  |
| 2008                               | -0.70 -1.14(-0.25)           |                             |                                            |                    |                      |                                                                  |
| 2009                               | -0.91 -1.37(-0.44)           |                             |                                            |                    |                      |                                                                  |
| Fixed treatment protocols          |                              |                             | 0.09 -0.29-0.48                            | 0.05 -0.34-0.44    | 0.04 -0.35-0.43      | 0.19 -0.34-0.71                                                  |
| Age (ref = < 50)                   |                              |                             |                                            |                    |                      |                                                                  |
| 50-59                              |                              |                             |                                            | 0 0.47 0.02-0.92   | 0 0.45 -0.00-0.90    | 0 0.01 -0.53-0.51                                                |
| 60-79                              |                              |                             |                                            | 0.88 0.47-1.29     | 0.91 0.49-1.32       | -0.12 -0.59-0.35                                                 |
| >80                                |                              |                             |                                            | 0.40 -0.14-0.94    | 0.50 -0.05-1.04      | -1.00 -1.69(-0.32)                                               |
| Sex (ref=men)                      |                              |                             |                                            |                    |                      |                                                                  |
| Women                              |                              |                             |                                            |                    | 0 -0.48 -0.71(-0.25) | 0 -0.28 -0.57-0.01                                               |
| LMCA involvement (ref=no)          |                              |                             |                                            |                    |                      |                                                                  |
| Yes                                |                              |                             |                                            |                    |                      | 0 -1.27 -1.58(-0.95)                                             |
| Number of occluded vessels (ref=1) |                              |                             |                                            |                    |                      |                                                                  |
| 2                                  |                              |                             |                                            |                    |                      | 0 1.61 1.00-2.22                                                 |
| 3                                  |                              |                             |                                            |                    |                      | 3.20 2.65-3.76                                                   |

## 4.2. Results from the Fine Grey model for NSTEMI at 60 days

### 4.2.a CAG

| NSTEMI    | Year categorical<br>n=18,947 |           | Year continuous<br>n=18,947 |           | + age<br>n=18,676 |               | + sex<br>n= 18,676 |               |
|-----------|------------------------------|-----------|-----------------------------|-----------|-------------------|---------------|--------------------|---------------|
|           | $\beta$                      | CI 95     | $\beta$                     | CI 95     | $\beta$           | CI 95         | $\beta$            | CI 95         |
| Year      |                              |           |                             |           |                   |               |                    |               |
| 2001      | 0                            |           | 0.10                        | 0.09-0.10 | 0                 |               | 0                  |               |
| 2002      | 0.16                         | 0.07-0.24 |                             |           | 0.21              | 0.12-0.29     | 0.21               | 0.12-0.29     |
| 2003      | 0.27                         | 0.19-0.36 |                             |           | 0.35              | 0.26-0.43     | 0.35               | 0.27-0.43     |
| 2004      | 0.32                         | 0.24-0.40 |                             |           | 0.44              | 0.36-0.52     | 0.43               | 0.36-0.51     |
| 2005      | 0.48                         | 0.40-0.56 |                             |           | 0.52              | 0.48-0.64     | 0.57               | 0.49-0.64     |
| 2006      | 0.50                         | 0.42-0.58 |                             |           | 0.54              | 0.48-0.65     | 0.57               | 0.48-0.65     |
| 2007      | 0.53                         | 0.44-0.61 |                             |           | 0.62              | 0.58-0.74     | 0.66               | 0.57-0.74     |
| 2008      | 0.75                         | 0.67-0.84 |                             |           | 0.89              | 0.87-1.04     | 0.96               | 0.87-1.04     |
| 2009      | 0.84                         | 0.75-0.93 |                             |           | 1.01              | 0.98-1.17     | 1.08               | 0.98-1.17     |
| Age       |                              |           |                             |           |                   |               |                    |               |
| Ref: < 50 |                              |           |                             |           | 0                 |               | 0                  |               |
| 50-59     |                              |           |                             |           | -0.06             | -0.22-0.08    | -0.15              | -0.22-0.08    |
| 60-79     |                              |           |                             |           | -0.49             | -0.65-(-0.53) | -0.56              | -0.63-(-0.50) |
| >80       |                              |           |                             |           | -2.22             | -2.41-(-2.25) | -2.27              | -2.36-(-2.19) |
| Sex       |                              |           |                             |           |                   |               |                    |               |
| Men       |                              |           |                             |           |                   |               | 0                  |               |
| Women     |                              |           |                             |           |                   |               | -0.20              | -0.24-(-0.16) |

### 4.2.b PCI

| NSTEMI                     | Year categorical<br>n=11,357 |            | Year continuous<br>n=11,357 |           | + age<br>n=11,131 |               | + sex<br>n=11,131 |               | + Number of occluded<br>vessels and LMCA<br>involvement, n=7,076 |               |
|----------------------------|------------------------------|------------|-----------------------------|-----------|-------------------|---------------|-------------------|---------------|------------------------------------------------------------------|---------------|
|                            | $\beta$                      | CI 95      | $\beta$                     | CI 95     | B                 | CI 95         | $\beta$           | CI 95         | B                                                                | CI 95         |
| Year                       |                              |            |                             |           |                   |               |                   |               |                                                                  |               |
| 2001                       | 0                            |            | 0.03                        | 0.02-0.04 | 0                 |               | 0                 |               | 0                                                                |               |
| 2002                       | 0.004                        | -0.14-0.15 |                             |           | 0.02              | -0.13-0.17    | 0.02              | -0.13-0.17    | -0.12                                                            | -0.34-0.11    |
| 2003                       | 0.06                         | -0.08-0.20 |                             |           | 0.06              | -0.09-0.20    | 0.06              | -0.09-0.20    | -0.08                                                            | -0.29-0.13    |
| 2004                       | 0.11                         | -0.02-0.25 |                             |           | 0.14              | -0.00-0.28    | 0.13              | -0.01-0.28    | -0.05                                                            | -0.26-0.16    |
| 2005                       | 0.17                         | 0.04-0.31  |                             |           | 0.20              | 0.06-0.34     | 0.20              | 0.06-0.34     | 0.03                                                             | -0.23-0.17    |
| 2006                       | 0.12                         | -0.02-0.25 |                             |           | 0.16              | 0.03-0.30     | 0.17              | 0.03-0.31     | -0.13                                                            | -0.33-0.07    |
| 2007                       | 0.03                         | -0.11-0.17 |                             |           | 0.04              | -0.10-0.18    | 0.05              | -0.09-0.19    | -0.18                                                            | -0.38-0.02    |
| 2008                       | 0.12                         | -0.01-0.26 |                             |           | 0.15              | 0.01-0.29     | 0.15              | 0.01-0.29     | -0.00                                                            | -0.20-0.20    |
| 2009                       | 0.35                         | 0.21-0.49  |                             |           | 0.40              | 0.25-0.54     | 0.40              | 0.26-0.54     | 0.17                                                             | 0.04-0.37     |
| Age                        |                              |            |                             |           |                   |               |                   |               |                                                                  |               |
| (ref = < 50)               |                              |            |                             |           | 0                 |               | 0                 |               | 0                                                                |               |
| 50-59                      |                              |            |                             |           | 0.05              | -0.04-0.15    | 0.05              | -0.05-0.14    | -0.05                                                            | -0.16-0.06    |
| 60-79                      |                              |            |                             |           | -0.25             | -0.34-(-0.16) | -0.24             | -0.32-(-0.15) | -0.22                                                            | -0.32-(-0.12) |
| >80                        |                              |            |                             |           | -0.29             | -0.41-(-0.17) | -0.25             | -0.36-(-0.13) | -0.20                                                            | -0.34-(-0.06) |
| Sex                        |                              |            |                             |           |                   |               |                   |               |                                                                  |               |
| (ref=men)                  |                              |            |                             |           |                   |               | 0                 |               | 0                                                                |               |
| Women                      |                              |            |                             |           |                   |               | -0.24             | -0.30-(-0.18) | -0.07                                                            | -0.14-0.01    |
| LMCA involvement           |                              |            |                             |           |                   |               |                   |               |                                                                  |               |
| (ref=no)                   |                              |            |                             |           |                   |               |                   |               | 0                                                                |               |
| Yes                        |                              |            |                             |           |                   |               |                   |               | 0.95                                                             | 0.62-1.28     |
| Number of occluded vessels |                              |            |                             |           |                   |               |                   |               |                                                                  |               |
| (ref=1)                    |                              |            |                             |           |                   |               |                   |               | 0                                                                |               |
| 2                          |                              |            |                             |           |                   |               |                   |               | -0.14                                                            | -0.20-(-0.07) |
| 3                          |                              |            |                             |           |                   |               |                   |               | -1.35                                                            | -1.44-(-1.25) |

4.2.c CABG

| NSTEMI                                      | Year categorical<br>n=11,357 | Year continuous<br>n=11,357 | + age<br>n=11,131  | + sex<br>n=11,131  | + Number of occluded<br>vessels and LMCA<br>involvement,n=7,076 |
|---------------------------------------------|------------------------------|-----------------------------|--------------------|--------------------|-----------------------------------------------------------------|
| Year                                        | $\beta$ CI 95                | $\beta$ CI 95               | B CI 95            | $\beta$ CI 95      | $\beta$ CI 95                                                   |
| 2001                                        | 0                            | -0.09 -0.11(-0.07)          | 0                  | 0                  | 0                                                               |
| 2002                                        | -0.00 -0.23-0.22             |                             | -0.04 -0.27-0.18   | -0.05 -0.28-0.17   | 0.11 -0.21-0.43                                                 |
| 2003                                        | -0.17 -0.39-0.05             |                             | -0.17 -0.39-0.05   | -0.18 -0.40-0.05   | 0.09 -0.23-0.40                                                 |
| 2004                                        | -0.28 -0.50(-0.05)           |                             | -0.28 -0.50(-0.05) | -0.29 -0.51(-0.07) | -0.02 -0.33-0.29                                                |
| 2005                                        | -0.39 -0.61(-0.17)           |                             | -0.36 -0.59(-0.14) | -0.37 -0.60(-0.15) | -0.14 -0.35-0.22                                                |
| 2006                                        | -0.62 -0.85(-0.39)           |                             | -0.60 -0.83(-0.37) | -0.61 -0.83(-0.38) | -0.53 -0.85(-0.22)                                              |
| 2007                                        | -0.39 -0.60(-0.17)           |                             | -0.37 -0.59(-0.16) | -0.36 -0.58(-0.15) | -0.10 -0.40-0.19                                                |
| 2008                                        | -0.61 -0.84(-0.39)           |                             | -0.60 -0.82(-0.37) | -0.61 -0.83(-0.39) | -0.41 -0.71(-0.10)                                              |
| 2009                                        | -0.70 -0.93(-0.47)           |                             | -0.69 -0.92(-0.46) | -0.71 -0.94(-0.48) | -0.30 -0.62-0.01                                                |
| Age<br>(ref = < 50)                         |                              |                             | 0                  | 0                  | 0                                                               |
| 50-59                                       |                              |                             | 0.73 0.48-0.98     | 0.71 0.46-0.97     | 0.28 -0.01-0.58                                                 |
| 60-79                                       |                              |                             | 1.31 1.08-1.54     | 1.35 1.12-1.59     | 0.33 -0.06-0.61                                                 |
| >80                                         |                              |                             | 0.43 0.13-0.74     | 0.55 0.24-0.86     | -1.16 -1.58(-0.77)                                              |
| Sex<br>(ref=men)                            |                              |                             |                    | 0                  | 0                                                               |
| Women                                       |                              |                             |                    | -0.59 -0.71(-0.48) | -0.31 -0.46(-0.16)                                              |
| LMCA<br>involve-<br>ment<br>(ref=no)        |                              |                             |                    |                    | 0                                                               |
| Yes                                         |                              |                             |                    |                    | -0.85 -1.08(-0.61)                                              |
| Number of<br>occluded<br>vessels<br>(ref=1) |                              |                             |                    |                    | 0                                                               |
| 2                                           |                              |                             |                    |                    | 2.11 1.79-2.44                                                  |
| 3                                           |                              |                             |                    |                    | 3.84 3.53-4.14                                                  |

## Appendix 5: Additional result for unstable angina

### 5.1. Results from the Fine Grey model for unstable angina at 3 days (CAG/PCI) and 7 days (CABG)

#### 5.1.a CAG

| Unstable angina           | Year categorical<br>n=8,820 |         | Year continuous<br>n=8,820 |         | + fixed treatment protocols<br>n=8,820 |         | + age<br>n=8,419 |         | + sex<br>n=8,419 |         |            |           |               |
|---------------------------|-----------------------------|---------|----------------------------|---------|----------------------------------------|---------|------------------|---------|------------------|---------|------------|-----------|---------------|
|                           | Year                        | $\beta$ | CI 95                      | $\beta$ | CI 95                                  | $\beta$ | CI 95            | $\beta$ | CI 95            | $\beta$ | CI 95      |           |               |
| 2001                      |                             | 0       |                            | 0.17    | 0.15-0.18                              |         | 0.17             |         | 0.17             |         | 0.17       | 0.15-0.19 |               |
| 2002                      |                             | 0.15    | -0.05-0.36                 |         |                                        |         |                  |         |                  |         |            |           |               |
| 2003                      |                             | 0.36    | 0.16-0.56                  |         |                                        |         |                  |         |                  |         |            |           |               |
| 2004                      |                             | 0.38    | 0.18-0.58                  |         |                                        |         |                  |         |                  |         |            |           |               |
| 2005                      |                             | 0.72    | 0.53-0.90                  |         |                                        |         |                  |         |                  |         |            |           |               |
| 2006                      |                             | 0.75    | 0.57-0.94                  |         |                                        |         |                  |         |                  |         |            |           |               |
| 2007                      |                             | 1.02    | 0.84-1.20                  |         |                                        |         |                  |         |                  |         |            |           |               |
| 2008                      |                             | 1.18    | 1.01-1.36                  |         |                                        |         |                  |         |                  |         |            |           |               |
| 2009                      |                             | 1.31    | 1.13-1.48                  |         |                                        |         |                  |         |                  |         |            |           |               |
| Fixed treatment protocols |                             |         |                            |         |                                        | -0.03   | -0.15-0.09       |         | -0.02            |         | -0.15-0.11 | -0.03     | -0.15-0.11    |
| Age                       |                             |         |                            |         |                                        |         |                  |         |                  |         |            |           |               |
| Ref: < 50                 |                             | 0       |                            |         |                                        |         |                  |         | 0                |         | 0          |           | 0             |
| 50-59                     |                             | 0.00    | -0.13-0.10                 |         |                                        |         |                  |         | 0.00             |         | 0.00       |           | -0.13-0.13    |
| 60-79                     |                             | 0.02    | 0.13-0.10                  |         |                                        |         |                  |         | 0.02             |         | 0.00       |           | -0.12-0.12    |
| >80                       |                             | -0.68   | -0.86-(-0.49)              |         |                                        |         |                  |         | -0.68            |         | -0.61      |           | -0.80-(-0.43) |
| Sex                       |                             |         |                            |         |                                        |         |                  |         |                  |         |            |           |               |
| Men                       |                             |         |                            |         |                                        |         |                  |         |                  |         | 0          |           | 0             |
| Women                     |                             |         |                            |         |                                        |         |                  |         |                  |         | -0.29      |           | -0.37-(-0.21) |

#### 5.1.b PCI

| Unstable angina            | Year categorical<br>n=4,089 |         | Year continuous<br>n=4,089 |         | + fixed treatment protocols<br>n=4,089 |         | + age<br>n=3,981 |         | + sex<br>n=3,981 |         | + Number of occluded vessels and LMCA involvement, n=2,556 |   |       |               |
|----------------------------|-----------------------------|---------|----------------------------|---------|----------------------------------------|---------|------------------|---------|------------------|---------|------------------------------------------------------------|---|-------|---------------|
|                            | Year                        | $\beta$ | CI 95                      | $\beta$ | CI 95                                  | $\beta$ | CI 95            | $\beta$ | CI 95            | $\beta$ | CI 95                                                      | B | CI 95 |               |
| 2001                       |                             | 0       |                            | 0.11    | 0.08-0.14                              |         | 0.11             |         | 0.12             |         | 0.12                                                       |   | 0.11  | 0.07-0.15     |
| 2002                       |                             | 0.20    | -0.16-0.57                 |         |                                        |         |                  |         |                  |         |                                                            |   |       |               |
| 2003                       |                             | 0.26    | -0.10-0.62                 |         |                                        |         |                  |         |                  |         |                                                            |   |       |               |
| 2004                       |                             | -0.27   | -0.69-0.15                 |         |                                        |         |                  |         |                  |         |                                                            |   |       |               |
| 2005                       |                             | 0.47    | 0.12-0.81                  |         |                                        |         |                  |         |                  |         |                                                            |   |       |               |
| 2006                       |                             | 0.51    | 0.16-0.85                  |         |                                        |         |                  |         |                  |         |                                                            |   |       |               |
| 2007                       |                             | 0.55    | 0.20-0.89                  |         |                                        |         |                  |         |                  |         |                                                            |   |       |               |
| 2008                       |                             | 0.82    | 0.51-1.14                  |         |                                        |         |                  |         |                  |         |                                                            |   |       |               |
| 2009                       |                             | 0.82    | 0.50-1.15                  |         |                                        |         |                  |         |                  |         |                                                            |   |       |               |
| Fixed treatment protocols  |                             |         |                            |         |                                        | -0.04   | -0.27-0.19       |         | -0.02            |         | -0.26-0.22                                                 |   | -0.01 | -0.25-0.23    |
| Age                        |                             |         |                            |         |                                        |         |                  |         |                  |         |                                                            |   |       |               |
| (ref = < 50)               |                             | 0       |                            |         |                                        |         |                  |         | 0                |         | 0                                                          |   | 0     |               |
| 50-59                      |                             | 0.01    | -0.24-0.23                 |         |                                        |         |                  |         | 0.01             |         | -0.01                                                      |   | -0.18 | -0.43-0.07    |
| 60-79                      |                             | -0.28   | -0.50-(-0.06)              |         |                                        |         |                  |         | -0.28            |         | -0.27                                                      |   | -0.37 | -0.61-(-0.13) |
| >80                        |                             | -0.25   | -0.59-0.08                 |         |                                        |         |                  |         | -0.25            |         | -0.20                                                      |   | -0.28 | -0.64-0.09    |
| Sex                        |                             |         |                            |         |                                        |         |                  |         |                  |         |                                                            |   |       |               |
| (ref=men)                  |                             |         |                            |         |                                        |         |                  |         |                  |         |                                                            |   | 0     |               |
| Women                      |                             |         |                            |         |                                        |         |                  |         |                  |         | -0.29                                                      |   | -0.10 | -0.28-0.07    |
| LMCA involvement           |                             |         |                            |         |                                        |         |                  |         |                  |         |                                                            |   |       |               |
| (ref=no)                   |                             |         |                            |         |                                        |         |                  |         |                  |         |                                                            |   | 0     |               |
| Yes                        |                             |         |                            |         |                                        |         |                  |         |                  |         |                                                            |   | 0.66  | -0.06-1.37    |
| Number of occluded vessels |                             |         |                            |         |                                        |         |                  |         |                  |         |                                                            |   |       |               |
| (ref=1)                    |                             |         |                            |         |                                        |         |                  |         |                  |         |                                                            |   | 0     |               |
| 2                          |                             |         |                            |         |                                        |         |                  |         |                  |         |                                                            |   | -0.35 | -0.54-(-0.16) |
| 3                          |                             |         |                            |         |                                        |         |                  |         |                  |         |                                                            |   | -1.34 | -1.62-(-1.05) |

5.1.c CABG

| Unstable angina                    | Year categorical<br>n=4,089 | Year continuous<br>n=4,089 | + fixed treatment<br>protocols<br>n=4,089 | + age<br>n=3,981   | + sex<br>n=3,981     | + Number of occluded<br>vessels and LMCA<br>involvement, n=2,556 |
|------------------------------------|-----------------------------|----------------------------|-------------------------------------------|--------------------|----------------------|------------------------------------------------------------------|
| Year                               | $\beta$ CI 95               | $\beta$ CI 95              | $\beta$ CI 95                             | B CI 95            | $\beta$ CI 95        | $\beta$ CI 95                                                    |
| 2001                               | 0                           | -0.18 -0.22(-0.13)         | -0.17 -0.22(-0.12)                        | -0.18 -0.22(-0.12) | -0.17 -0.23(-0.12)   | -0.13 -0.20(-0.06)                                               |
| 2002                               | 0.02 -0.37-0.41             |                            |                                           |                    |                      |                                                                  |
| 2003                               | -0.05 -0.45-0.34            |                            |                                           |                    |                      |                                                                  |
| 2004                               | -0.17 -0.59-0.24            |                            |                                           |                    |                      |                                                                  |
| 2005                               | -0.89 -1.39(-0.39)          |                            |                                           |                    |                      |                                                                  |
| 2006                               | -0.78 -1.26(-0.29)          |                            |                                           |                    |                      |                                                                  |
| 2007                               | -1.07 -1.61(-0.54)          |                            |                                           |                    |                      |                                                                  |
| 2008                               | -0.96 -1.42(-0.50)          |                            |                                           |                    |                      |                                                                  |
| 2009                               | -1.36 -1.93(-0.78)          |                            |                                           |                    |                      |                                                                  |
| Fixed treatment protocols          |                             |                            | -0.11 -0.69-0.47                          | -0.11 -0.69-0.48   | -0.10 -0.68-0.48     | -0.41 -1.28-0.45                                                 |
| Age (ref = < 50)                   |                             |                            |                                           |                    |                      |                                                                  |
| 50-59                              |                             |                            |                                           | 0                  | 0                    | 0                                                                |
| 60-79                              |                             |                            |                                           | 0.49 -0.09-1.07    | 0.48 -0.10-1.05      | -0.15 -0.80-0.49                                                 |
| >80                                |                             |                            |                                           | 1.26 0.74-1.79     | 1.30 0.77-1.82       | 0.14 -0.45-0.73                                                  |
|                                    |                             |                            |                                           | 0.76 0.05-1.46     | 0.87 0.16-1.58       | -1.12 -2.12(-0.11)                                               |
| Sex (ref=men)                      |                             |                            |                                           |                    |                      |                                                                  |
| Women                              |                             |                            |                                           |                    | 0 -0.64 -0.92(-0.36) | 0 -0.33 -0.69-0.02                                               |
| LMCA involvement (ref=no)          |                             |                            |                                           |                    |                      |                                                                  |
| Yes                                |                             |                            |                                           |                    |                      | 0 -1.14 -1.50(-0.77)                                             |
| Number of occluded vessels (ref=1) |                             |                            |                                           |                    |                      |                                                                  |
| 2                                  |                             |                            |                                           |                    |                      | 0 2.28 1.53-3.02                                                 |
| 3                                  |                             |                            |                                           |                    |                      | 3.33 2.61-4.05                                                   |

5.2. Results from the Fine Grey model for unstable angina at 60 days

5.2.a CAG

| Unstable angina | Year categorical<br>n=8,820 | Year continuous<br>n=8,820 | + age<br>n=8,419   | + sex<br>n=8,419   |
|-----------------|-----------------------------|----------------------------|--------------------|--------------------|
| Year            | $\beta$ CI 95               | $\beta$ CI 95              | $\beta$ CI 95      | $\beta$ CI 95      |
| 2001            | 0                           | 0.11 0.10-0.12             | 0                  | 0                  |
| 2002            | 0.05 -0.05-0.15             |                            | 0.13 -0.03-0.24    | 0.13 -0.03-0.24    |
| 2003            | 0.16 0.05-0.27              |                            | 0.16 0.05-0.27     | 0.15 0.05-0.26     |
| 2004            | 0.31 0.21-0.41              |                            | 0.32 0.22-0.42     | 0.32 0.22-0.43     |
| 2005            | 0.42 0.32-0.52              |                            | 0.45 0.35-0.55     | 0.45 0.34-0.55     |
| 2006            | 0.41 0.31-0.52              |                            | 0.42 0.32-0.52     | 0.42 0.32-0.52     |
| 2007            | 0.61 0.50-0.72              |                            | 0.57 0.46-0.68     | 0.57 0.46-0.68     |
| 2008            | 0.79 0.69-0.90              |                            | 0.79 0.68-0.90     | 0.79 0.68-0.90     |
| 2009            | 0.78 0.67-0.89              |                            | 0.77 0.66-0.89     | 0.77 0.66-0.89     |
| Age (Ref: < 50) |                             |                            |                    |                    |
| 50-59           |                             |                            | 0                  | 0                  |
| 60-79           |                             |                            | 0.14 0.05-0.22     | 0.14 0.05-0.22     |
| >80             |                             |                            | 0.03 -0.05-0.11    | 0.04 -0.04-0.12    |
|                 |                             |                            | -1.01 -1.14(-0.89) | -0.97 -1.10(-0.85) |
| Sex             |                             |                            |                    |                    |
| Men             |                             |                            |                    | 0                  |
| Women           |                             |                            |                    | -0.17 -0.23(-0.12) |

1  
2  
3  
4  
5  
6  
7  
8  
9  
10  
11  
12  
13  
14  
15  
16  
17  
18  
19  
20  
21  
22  
23  
24  
25  
26  
27  
28  
29  
30  
31  
32  
33  
34  
35  
36  
37  
38  
39  
40  
41  
42  
43  
44  
45  
46  
47  
48  
49  
50  
51  
52  
53  
54  
55  
56  
57  
58  
59  
60

## 5.2.b PCI

| Unstable angina                    | Year categorical n=4,089 |              | Year continuous n=4,089 |           | + age n=3,981 |              | + sex n=3,981 |              | + Number of occluded vessels and LMCA involvement, n=2,556 |              |
|------------------------------------|--------------------------|--------------|-------------------------|-----------|---------------|--------------|---------------|--------------|------------------------------------------------------------|--------------|
|                                    | $\beta$                  | CI 95        | $\beta$                 | CI 95     | $\beta$       | CI 95        | $\beta$       | CI 95        | B                                                          | CI 95        |
| Year                               |                          |              |                         |           |               |              |               |              |                                                            |              |
| 2001                               | 0                        |              | 0.02                    | 0.01-0.04 | 0             |              | 0             |              | 0                                                          |              |
| 2002                               | -0.07                    | -0.26-0.11   |                         |           | -0.08         | -0.27-0.10   | -0.08         | -0.27-0.10   | -0.03                                                      | -0.23-0.17   |
| 2003                               | -0.02                    | -0.21-0.16   |                         |           | -0.04         | -0.23-0.14   | -0.04         | -0.22-0.14   | 0.01                                                       | -0.19-0.21   |
| 2004                               | -0.23                    | -0.42(-0.05) |                         |           | -0.23         | -0.42(-0.04) | -0.22         | -0.41(-0.03) | -0.12                                                      | -0.34-0.09   |
| 2005                               | 0.06                     | -0.12-0.24   |                         |           | 0.07          | -0.11-0.25   | 0.07          | -0.11-0.25   | 0.07                                                       | -0.12-0.27   |
| 2006                               | 0.06                     | -0.12-0.24   |                         |           | 0.04          | -0.14-0.22   | 0.03          | -0.15-0.21   | 0.06                                                       | -0.13-0.24   |
| 2007                               | 0.00                     | -0.18-0.18   |                         |           | 0.04          | -0.22-0.15   | -0.03         | -0.22-0.15   | 0.02                                                       | -0.18-0.22   |
| 2008                               | 0.10                     | -0.07-0.27   |                         |           | 0.11          | -0.07-0.28   | 0.11          | -0.06-0.28   | 0.22                                                       | 0.03-0.41    |
| 2009                               | 0.14                     | -0.04-0.32   |                         |           | 0.12          | -0.06-0.31   | 0.13          | -0.06-0.32   | 0.33                                                       | 0.12-0.53    |
| Age (ref = < 50)                   |                          |              |                         |           | 0             |              | 0             |              | 0                                                          |              |
| 50-59                              |                          |              |                         |           | 0.19          | 0.03-0.34    | 0.18          | 0.03-0.34    | -0.02                                                      | -0.21-0.16   |
| 60-79                              |                          |              |                         |           | 0.02          | -0.12-0.16   | 0.02          | -0.12-0.17   | -0.17                                                      | -0.34-0.00   |
| >80                                |                          |              |                         |           | 0.16          | 0.04-0.36    | 0.18          | -0.02-0.38   | -0.04                                                      | -0.27-0.20   |
| Sex (ref=men)                      |                          |              |                         |           |               |              | 0             |              | 0                                                          |              |
| Women                              |                          |              |                         |           |               |              | -0.12         | -0.21(-0.02) | 0.08                                                       | -0.03-0.18   |
| LMCA involvement (ref=no)          |                          |              |                         |           |               |              |               |              | 0                                                          |              |
| Yes                                |                          |              |                         |           |               |              |               |              | 1.43                                                       | 0.92-1.94    |
| Number of occluded vessels (ref=1) |                          |              |                         |           |               |              |               |              | 0                                                          |              |
| 2                                  |                          |              |                         |           |               |              |               |              | -0.22                                                      | -0.33(-0.11) |
| 3                                  |                          |              |                         |           |               |              |               |              | -1.45                                                      | -1.62(-1.29) |

## 5.2.b CABG

| Unstable angina                    | Year categorical n=4,089 |              | Year continuous n=4,089 |              | + age n=3,981 |              | + sex n=3,981 |              | + Number of occluded vessels and LMCA involvement, n=2,556 |              |
|------------------------------------|--------------------------|--------------|-------------------------|--------------|---------------|--------------|---------------|--------------|------------------------------------------------------------|--------------|
|                                    | $\beta$                  | CI 95        | $\beta$                 | CI 95        | B             | CI 95        | $\beta$       | CI 95        | $\beta$                                                    | CI 95        |
| Year                               |                          |              |                         |              |               |              |               |              |                                                            |              |
| 2001                               | 0                        |              | -0.14                   | -0.17(-0.11) | 0             |              | 0             |              | 0                                                          |              |
| 2002                               | 0.07                     | -0.18-0.33   |                         |              | -0.05         | -0.21-0.31   | 0.05          | -0.21-0.31   | 0.10                                                       | -0.21-0.42   |
| 2003                               | -0.17                    | -0.44-0.11   |                         |              | -0.19         | -0.47-0.08   | -0.18         | -0.46-0.10   | 0.34                                                       | 0.02-0.67    |
| 2004                               | -0.30                    | -0.59(-0.02) |                         |              | -0.32         | -0.62(-0.03) | -0.28         | -0.57-0.02   | -0.19                                                      | -0.56(-0.19) |
| 2005                               | -0.69                    | -1.00(-0.39) |                         |              | -0.75         | -1.06(-0.45) | -0.75         | -1.06(-0.45) | -0.56                                                      | -0.93(-0.20) |
| 2006                               | -0.73                    | -1.04(-0.42) |                         |              | -0.73         | -1.05(-0.42) | -0.74         | -1.05(-0.42) | -0.54                                                      | -0.93(-0.15) |
| 2007                               | -0.61                    | -0.91(-0.32) |                         |              | -0.60         | -0.90(-0.30) | -0.59         | -0.89(-0.29) | -0.41                                                      | -0.79(-0.04) |
| 2008                               | -0.93                    | -1.22(-0.63) |                         |              | -0.96         | -1.26(-0.66) | -0.95         | -1.25(-0.65) | -0.45                                                      | -0.83(-0.07) |
| 2009                               | -0.95                    | -1.27(-0.63) |                         |              | -0.99         | -1.31(-0.66) | -0.97         | -1.29(-0.64) | -0.42                                                      | -0.81(-0.03) |
| Age (ref = < 50)                   |                          |              |                         |              | 0             |              | 0             |              | 0                                                          |              |
| 50-59                              |                          |              |                         |              | 0.71          | 0.34-1.07    | 0.70          | 0.33-1.06    | 0.07                                                       | -0.38-0.52   |
| 60-79                              |                          |              |                         |              | 1.35          | 1.01-1.69    | 1.39          | 1.04-1.73    | 0.30                                                       | 0.12-0.73    |
| >80                                |                          |              |                         |              | 0.57          | 0.01-1.05    | 0.69          | 0.21-1.17    | -1.30                                                      | -1.97(-0.62) |
| Sex (ref=men)                      |                          |              |                         |              |               |              | 0             |              | 0                                                          |              |
| Women                              |                          |              |                         |              |               |              | -0.65         | -0.82(-0.47) | -0.25                                                      | -0.47(-0.04) |
| LMCA involvement (ref=no)          |                          |              |                         |              |               |              |               |              | 0                                                          |              |
| Yes                                |                          |              |                         |              |               |              |               |              | -1.04                                                      | -1.32(-0.76) |
| Number of occluded vessels (ref=1) |                          |              |                         |              |               |              |               |              | 0                                                          |              |
| 2                                  |                          |              |                         |              |               |              |               |              | 2.14                                                       | 1.73-2.56    |
| 3                                  |                          |              |                         |              |               |              |               |              | 3.49                                                       | 3.09-3.90    |

## STROBE Statement—checklist of items that should be included in reports of observational studies

|                              | Item No | Recommendation                                                                                                                                                                                                                                                                                                                                                                                                                                                                                                                                                                                                                                                                                   |   |
|------------------------------|---------|--------------------------------------------------------------------------------------------------------------------------------------------------------------------------------------------------------------------------------------------------------------------------------------------------------------------------------------------------------------------------------------------------------------------------------------------------------------------------------------------------------------------------------------------------------------------------------------------------------------------------------------------------------------------------------------------------|---|
| <b>Title and abstract</b>    | 1       | (a) Indicate the study's design with a commonly used term in the title or the abstract<br>(b) Provide in the abstract an informative and balanced summary of what was done and what was found                                                                                                                                                                                                                                                                                                                                                                                                                                                                                                    | ✓ |
| <b>Introduction</b>          |         |                                                                                                                                                                                                                                                                                                                                                                                                                                                                                                                                                                                                                                                                                                  |   |
| Background/rationale         | 2       | Explain the scientific background and rationale for the investigation being reported                                                                                                                                                                                                                                                                                                                                                                                                                                                                                                                                                                                                             | ✓ |
| Objectives                   | 3       | State specific objectives, including any prespecified hypotheses                                                                                                                                                                                                                                                                                                                                                                                                                                                                                                                                                                                                                                 | ✓ |
| <b>Methods</b>               |         |                                                                                                                                                                                                                                                                                                                                                                                                                                                                                                                                                                                                                                                                                                  |   |
| Study design                 | 4       | Present key elements of study design early in the paper                                                                                                                                                                                                                                                                                                                                                                                                                                                                                                                                                                                                                                          | ✓ |
| Setting                      | 5       | Describe the setting, locations, and relevant dates, including periods of recruitment, exposure, follow-up, and data collection                                                                                                                                                                                                                                                                                                                                                                                                                                                                                                                                                                  | ✓ |
| Participants                 | 6       | (a) <i>Cohort study</i> —Give the eligibility criteria, and the sources and methods of selection of participants. Describe methods of follow-up<br><i>Case-control study</i> —Give the eligibility criteria, and the sources and methods of case ascertainment and control selection. Give the rationale for the choice of cases and controls<br><i>Cross-sectional study</i> —Give the eligibility criteria, and the sources and methods of selection of participants<br>(b) <i>Cohort study</i> —For matched studies, give matching criteria and number of exposed and unexposed<br><i>Case-control study</i> —For matched studies, give matching criteria and the number of controls per case | ✓ |
| Variables                    | 7       | Clearly define all outcomes, exposures, predictors, potential confounders, and effect modifiers. Give diagnostic criteria, if applicable                                                                                                                                                                                                                                                                                                                                                                                                                                                                                                                                                         | ✓ |
| Data sources/<br>measurement | 8*      | For each variable of interest, give sources of data and details of methods of assessment (measurement). Describe comparability of assessment methods if there is more than one group                                                                                                                                                                                                                                                                                                                                                                                                                                                                                                             | ✓ |
| Bias                         | 9       | Describe any efforts to address potential sources of bias                                                                                                                                                                                                                                                                                                                                                                                                                                                                                                                                                                                                                                        | ✓ |
| Study size                   | 10      | Explain how the study size was arrived at                                                                                                                                                                                                                                                                                                                                                                                                                                                                                                                                                                                                                                                        | ✓ |
| Quantitative variables       | 11      | Explain how quantitative variables were handled in the analyses. If applicable, describe which groupings were chosen and why                                                                                                                                                                                                                                                                                                                                                                                                                                                                                                                                                                     | ✓ |
| Statistical methods          | 12      | (a) Describe all statistical methods, including those used to control for confounding<br>(b) Describe any methods used to examine subgroups and interactions<br>(c) Explain how missing data were addressed<br>(d) <i>Cohort study</i> —If applicable, explain how loss to follow-up was addressed<br><i>Case-control study</i> —If applicable, explain how matching of cases and controls was addressed<br><i>Cross-sectional study</i> —If applicable, describe analytical methods taking account of sampling strategy<br>(e) Describe any sensitivity analyses                                                                                                                                | ✓ |

Continued on next page

1  
2  
3  
4  
5  
6  
7  
8  
9  
10  
11  
12  
13  
14  
15  
16  
17  
18  
19  
20  
21  
22  
23  
24  
25  
26  
27  
28  
29  
30  
31  
32  
33  
34  
35  
36  
37  
38  
39  
40  
41  
42  
43  
44  
45  
46  
47  
48  
49  
50  
51  
52  
53  
54  
55  
56  
57  
58  
59  
60**Results**

|                  |     |                                                                                                                                                                                                              |   |
|------------------|-----|--------------------------------------------------------------------------------------------------------------------------------------------------------------------------------------------------------------|---|
| Participants     | 13* | (a) Report numbers of individuals at each stage of study—eg numbers potentially eligible, examined for eligibility, confirmed eligible, included in the study, completing follow-up, and analysed            | ✓ |
|                  |     | (b) Give reasons for non-participation at each stage                                                                                                                                                         | ✓ |
|                  |     | (c) Consider use of a flow diagram                                                                                                                                                                           | ✓ |
| Descriptive data | 14* | (a) Give characteristics of study participants (eg demographic, clinical, social) and information on exposures and potential confounders                                                                     | ✓ |
|                  |     | (b) Indicate number of participants with missing data for each variable of interest                                                                                                                          | ✓ |
|                  |     | (c) <i>Cohort study</i> —Summarise follow-up time (eg, average and total amount)                                                                                                                             | ✗ |
| Outcome data     | 15* | <i>Cohort study</i> —Report numbers of outcome events or summary measures over time                                                                                                                          | ✓ |
|                  |     | <i>Case-control study</i> —Report numbers in each exposure category, or summary measures of exposure                                                                                                         |   |
|                  |     | <i>Cross-sectional study</i> —Report numbers of outcome events or summary measures                                                                                                                           |   |
| Main results     | 16  | (a) Give unadjusted estimates and, if applicable, confounder-adjusted estimates and their precision (eg, 95% confidence interval). Make clear which confounders were adjusted for and why they were included | ✓ |
|                  |     | (b) Report category boundaries when continuous variables were categorized                                                                                                                                    | ✓ |
|                  |     | (c) If relevant, consider translating estimates of relative risk into absolute risk for a meaningful time period                                                                                             |   |
| Other analyses   | 17  | Report other analyses done—eg analyses of subgroups and interactions, and sensitivity analyses                                                                                                               | ✓ |

**Discussion**

|                          |    |                                                                                                                                                                            |   |
|--------------------------|----|----------------------------------------------------------------------------------------------------------------------------------------------------------------------------|---|
| Key results              | 18 | Summarise key results with reference to study objectives                                                                                                                   | ✓ |
| Limitations              | 19 | Discuss limitations of the study, taking into account sources of potential bias or imprecision. Discuss both direction and magnitude of any potential bias                 | ✓ |
| Interpretation           | 20 | Give a cautious overall interpretation of results considering objectives, limitations, multiplicity of analyses, results from similar studies, and other relevant evidence | ✓ |
| Generalisability         | 21 | Discuss the generalisability (external validity) of the study results                                                                                                      | ✓ |
| <b>Other information</b> |    |                                                                                                                                                                            |   |
| Funding                  | 22 | Give the source of funding and the role of the funders for the present study and, if applicable, for the original study on which the present article is based              | ✓ |

\*Give information separately for cases and controls in case-control studies and, if applicable, for exposed and unexposed groups in cohort and cross-sectional studies.

**Note:** An Explanation and Elaboration article discusses each checklist item and gives methodological background and published examples of transparent reporting. The STROBE checklist is best used in conjunction with this article (freely available on the Web sites of PLoS Medicine at <http://www.plosmedicine.org/>, Annals of Internal Medicine at <http://www.annals.org/>, and Epidemiology at <http://www.epidem.com/>). Information on the STROBE Initiative is available at [www.strobe-statement.org](http://www.strobe-statement.org).
